# Supplementary material for: Model-based analysis of N-glycosylation in Chinese hamster ovary cells
Source: PLoS One. 2017 May 9;12(5):e0175376. doi: 10.1371/journal.pone.0175376 (PMC5423595; doi:10.1371/journal.pone.0175376)
Supplement: S2 Table — (CSV) [file pone.0175376.s003.csv]

Index	Component
1	water
2	GDP-Fuc
3	UDP-GlcNAc
4	UDP-Gal
5	CMP-NeuAc
6	mannose
7	GDP
8	UDP
9	CMP
10	Ma2Ma2Ma3(Ma2Ma3(Ma2Ma6)Ma6)Mb4GNb4GN;Asn
11	Ma2Ma2Ma3(Ma3(Ma2Ma6)Ma6)Mb4GNb4GN;Asn
12	Ga3Ma2Ma2Ma3(Ma2Ma3(Ma2Ma6)Ma6)Mb4GNb4GN;Asn
13	Ma2Ma3(Ma2Ma3(Ma2Ma6)Ma6)Mb4GNb4GN;Asn
14	Ma2Ma2Ma3(Ma2Ma3(Ma6)Ma6)Mb4GNb4GN;Asn
15	Ma2Ma3(Ma3(Ma2Ma6)Ma6)Mb4GNb4GN;Asn
16	Ma2Ma2Ma3(Ma3(Ma6)Ma6)Mb4GNb4GN;Asn
17	Ma3(Ma2Ma3(Ma2Ma6)Ma6)Mb4GNb4GN;Asn
18	Ma2Ma3(Ma2Ma3(Ma6)Ma6)Mb4GNb4GN;Asn
19	Ma3(Ma3(Ma2Ma6)Ma6)Mb4GNb4GN;Asn
20	Ma2Ma3(Ma3(Ma6)Ma6)Mb4GNb4GN;Asn
21	Ma3(Ma2Ma3(Ma6)Ma6)Mb4GNb4GN;Asn
22	Ma3(Ma3(Ma6)Ma6)Mb4GNb4GN;Asn
23	GNb2Ma3(Ma3(Ma6)Ma6)Mb4GNb4GN;Asn
24	GNb2Ma3(Ma6Ma6)Mb4GNb4GN;Asn
25	GNb2Ma3(Ma3(Ma6)Ma6)Mb4GNb4(Fa6)GN;Asn
26	GNb2Ma3(GNb4)(Ma3(Ma6)Ma6)Mb4GNb4GN;Asn
27	GNb2(GNb4)Ma3(Ma3(Ma6)Ma6)Mb4GNb4GN;Asn
28	Ab4GNb2Ma3(Ma3(Ma6)Ma6)Mb4GNb4GN;Asn
29	GNb2Ma3(Ma6)Mb4GNb4GN;Asn
30	GNb2Ma3(Ma6Ma6)Mb4GNb4(Fa6)GN;Asn
31	GNb2(GNb4)Ma3(Ma6Ma6)Mb4GNb4GN;Asn
32	Ab4GNb2Ma3(Ma6Ma6)Mb4GNb4GN;Asn
33	GNb2Ma3(GNb4)(Ma3(Ma6)Ma6)Mb4GNb4(Fa6)GN;Asn
34	GNb2(GNb4)Ma3(Ma3(Ma6)Ma6)Mb4GNb4(Fa6)GN;Asn
35	Ab4GNb2Ma3(Ma3(Ma6)Ma6)Mb4GNb4(Fa6)GN;Asn
36	Ab4GNb2Ma3(GNb4)(Ma3(Ma6)Ma6)Mb4GNb4GN;Asn
37	GNb2(GNb4)Ma3(GNb4)(Ma3(Ma6)Ma6)Mb4GNb4GN;Asn
38	Ab4GNb2(GNb4)Ma3(Ma3(Ma6)Ma6)Mb4GNb4GN;Asn
39	GNb2(Ab4GNb4)Ma3(Ma3(Ma6)Ma6)Mb4GNb4GN;Asn
40	GNb3Ab4GNb2Ma3(Ma3(Ma6)Ma6)Mb4GNb4GN;Asn
41	NNa3Ab4GNb2Ma3(Ma3(Ma6)Ma6)Mb4GNb4GN;Asn
42	Fa3(Ab4)GNb2Ma3(Ma3(Ma6)Ma6)Mb4GNb4GN;Asn
43	Aa3Ab4GNb2Ma3(Ma3(Ma6)Ma6)Mb4GNb4GN;Asn
44	GNb2Ma3(Ma6)Mb4GNb4(Fa6)GN;Asn
45	GNb2Ma3(GNb2Ma6)Mb4GNb4GN;Asn
46	GNb2Ma3(GNb4)(Ma6)Mb4GNb4GN;Asn
47	GNb2(GNb4)Ma3(Ma6)Mb4GNb4GN;Asn
48	Ab4GNb2Ma3(Ma6)Mb4GNb4GN;Asn
49	GNb2(GNb4)Ma3(Ma6Ma6)Mb4GNb4(Fa6)GN;Asn
50	Ab4GNb2Ma3(Ma6Ma6)Mb4GNb4(Fa6)GN;Asn
51	Ab4GNb2(GNb4)Ma3(Ma6Ma6)Mb4GNb4GN;Asn
52	GNb2(Ab4GNb4)Ma3(Ma6Ma6)Mb4GNb4GN;Asn
53	GNb3Ab4GNb2Ma3(Ma6Ma6)Mb4GNb4GN;Asn
54	NNa3Ab4GNb2Ma3(Ma6Ma6)Mb4GNb4GN;Asn
55	Fa3(Ab4)GNb2Ma3(Ma6Ma6)Mb4GNb4GN;Asn
56	Aa3Ab4GNb2Ma3(Ma6Ma6)Mb4GNb4GN;Asn
57	Ab4GNb2Ma3(GNb4)(Ma3(Ma6)Ma6)Mb4GNb4(Fa6)GN;Asn
58	GNb2(GNb4)Ma3(GNb4)(Ma3(Ma6)Ma6)Mb4GNb4(Fa6)GN;Asn
59	Ab4GNb2(GNb4)Ma3(Ma3(Ma6)Ma6)Mb4GNb4(Fa6)GN;Asn
60	GNb2(Ab4GNb4)Ma3(Ma3(Ma6)Ma6)Mb4GNb4(Fa6)GN;Asn
61	GNb3Ab4GNb2Ma3(Ma3(Ma6)Ma6)Mb4GNb4(Fa6)GN;Asn
62	NNa3Ab4GNb2Ma3(Ma3(Ma6)Ma6)Mb4GNb4(Fa6)GN;Asn
63	Fa3(Ab4)GNb2Ma3(Ma3(Ma6)Ma6)Mb4GNb4(Fa6)GN;Asn
64	Aa3Ab4GNb2Ma3(Ma3(Ma6)Ma6)Mb4GNb4(Fa6)GN;Asn
65	GNb3Ab4GNb2Ma3(GNb4)(Ma3(Ma6)Ma6)Mb4GNb4GN;Asn
66	NNa3Ab4GNb2Ma3(GNb4)(Ma3(Ma6)Ma6)Mb4GNb4GN;Asn
67	Fa3(Ab4)GNb2Ma3(GNb4)(Ma3(Ma6)Ma6)Mb4GNb4GN;Asn
68	Aa3Ab4GNb2Ma3(GNb4)(Ma3(Ma6)Ma6)Mb4GNb4GN;Asn
69	Ab4GNb2(GNb4)Ma3(GNb4)(Ma3(Ma6)Ma6)Mb4GNb4GN;Asn
70	GNb2(Ab4GNb4)Ma3(GNb4)(Ma3(Ma6)Ma6)Mb4GNb4GN;Asn
71	GNb3Ab4GNb2(GNb4)Ma3(Ma3(Ma6)Ma6)Mb4GNb4GN;Asn
72	Ab4GNb2(Ab4GNb4)Ma3(Ma3(Ma6)Ma6)Mb4GNb4GN;Asn
73	NNa3Ab4GNb2(GNb4)Ma3(Ma3(Ma6)Ma6)Mb4GNb4GN;Asn
74	Fa3(Ab4)GNb2(GNb4)Ma3(Ma3(Ma6)Ma6)Mb4GNb4GN;Asn
75	Aa3Ab4GNb2(GNb4)Ma3(Ma3(Ma6)Ma6)Mb4GNb4GN;Asn
76	GNb2(GNb3Ab4GNb4)Ma3(Ma3(Ma6)Ma6)Mb4GNb4GN;Asn
77	GNb2(NNa3Ab4GNb4)Ma3(Ma3(Ma6)Ma6)Mb4GNb4GN;Asn
78	GNb2(Fa3(Ab4)GNb4)Ma3(Ma3(Ma6)Ma6)Mb4GNb4GN;Asn
79	GNb2(Aa3Ab4GNb4)Ma3(Ma3(Ma6)Ma6)Mb4GNb4GN;Asn
80	Ab4GNb3Ab4GNb2Ma3(Ma3(Ma6)Ma6)Mb4GNb4GN;Asn
81	Fa3(GNb3Ab4)GNb2Ma3(Ma3(Ma6)Ma6)Mb4GNb4GN;Asn
82	Fa3(NNa3Ab4)GNb2Ma3(Ma3(Ma6)Ma6)Mb4GNb4GN;Asn
83	Fa3(Aa3Ab4)GNb2Ma3(Ma3(Ma6)Ma6)Mb4GNb4GN;Asn
84	GNb2Ma3(GNb2Ma6)Mb4GNb4(Fa6)GN;Asn
85	GNb2Ma3(GNb4)(Ma6)Mb4GNb4(Fa6)GN;Asn
86	GNb2(GNb4)Ma3(Ma6)Mb4GNb4(Fa6)GN;Asn
87	Ab4GNb2Ma3(Ma6)Mb4GNb4(Fa6)GN;Asn
88	GNb2Ma3(GNb4)(GNb2Ma6)Mb4GNb4GN;Asn
89	GNb2(GNb4)Ma3(GNb2Ma6)Mb4GNb4GN;Asn
90	GNb2Ma3(GNb2(GNb6)Ma6)Mb4GNb4GN;Asn
91	Ab4GNb2Ma3(GNb2Ma6)Mb4GNb4GN;Asn
92	GNb2Ma3(Ab4GNb2Ma6)Mb4GNb4GN;Asn
93	Ab4GNb2Ma3(GNb4)(Ma6)Mb4GNb4GN;Asn
94	GNb2(GNb4)Ma3(GNb4)(Ma6)Mb4GNb4GN;Asn
95	Ab4GNb2(GNb4)Ma3(Ma6)Mb4GNb4GN;Asn
96	GNb2(Ab4GNb4)Ma3(Ma6)Mb4GNb4GN;Asn
97	GNb3Ab4GNb2Ma3(Ma6)Mb4GNb4GN;Asn
98	NNa3Ab4GNb2Ma3(Ma6)Mb4GNb4GN;Asn
99	Fa3(Ab4)GNb2Ma3(Ma6)Mb4GNb4GN;Asn
100	Aa3Ab4GNb2Ma3(Ma6)Mb4GNb4GN;Asn
101	Ab4GNb2(GNb4)Ma3(Ma6Ma6)Mb4GNb4(Fa6)GN;Asn
102	GNb2(Ab4GNb4)Ma3(Ma6Ma6)Mb4GNb4(Fa6)GN;Asn
103	GNb3Ab4GNb2Ma3(Ma6Ma6)Mb4GNb4(Fa6)GN;Asn
104	NNa3Ab4GNb2Ma3(Ma6Ma6)Mb4GNb4(Fa6)GN;Asn
105	Fa3(Ab4)GNb2Ma3(Ma6Ma6)Mb4GNb4(Fa6)GN;Asn
106	Aa3Ab4GNb2Ma3(Ma6Ma6)Mb4GNb4(Fa6)GN;Asn
107	Ab4GNb2(Ab4GNb4)Ma3(Ma6Ma6)Mb4GNb4GN;Asn
108	NNa3Ab4GNb2(GNb4)Ma3(Ma6Ma6)Mb4GNb4GN;Asn
109	Fa3(Ab4)GNb2(GNb4)Ma3(Ma6Ma6)Mb4GNb4GN;Asn
110	Aa3Ab4GNb2(GNb4)Ma3(Ma6Ma6)Mb4GNb4GN;Asn
111	GNb2(GNb3Ab4GNb4)Ma3(Ma6Ma6)Mb4GNb4GN;Asn
112	GNb2(NNa3Ab4GNb4)Ma3(Ma6Ma6)Mb4GNb4GN;Asn
113	GNb2(Fa3(Ab4)GNb4)Ma3(Ma6Ma6)Mb4GNb4GN;Asn
114	GNb2(Aa3Ab4GNb4)Ma3(Ma6Ma6)Mb4GNb4GN;Asn
115	Ab4GNb3Ab4GNb2Ma3(Ma6Ma6)Mb4GNb4GN;Asn
116	Fa3(GNb3Ab4)GNb2Ma3(Ma6Ma6)Mb4GNb4GN;Asn
117	Fa3(NNa3Ab4)GNb2Ma3(Ma6Ma6)Mb4GNb4GN;Asn
118	Fa3(Aa3Ab4)GNb2Ma3(Ma6Ma6)Mb4GNb4GN;Asn
119	NNa3Ab4GNb2Ma3(GNb4)(Ma3(Ma6)Ma6)Mb4GNb4(Fa6)GN;Asn
120	Fa3(Ab4)GNb2Ma3(GNb4)(Ma3(Ma6)Ma6)Mb4GNb4(Fa6)GN;Asn
121	Aa3Ab4GNb2Ma3(GNb4)(Ma3(Ma6)Ma6)Mb4GNb4(Fa6)GN;Asn
122	Ab4GNb2(GNb4)Ma3(GNb4)(Ma3(Ma6)Ma6)Mb4GNb4(Fa6)GN;Asn
123	GNb2(Ab4GNb4)Ma3(GNb4)(Ma3(Ma6)Ma6)Mb4GNb4(Fa6)GN;Asn
124	Ab4GNb2(Ab4GNb4)Ma3(Ma3(Ma6)Ma6)Mb4GNb4(Fa6)GN;Asn
125	NNa3Ab4GNb2(GNb4)Ma3(Ma3(Ma6)Ma6)Mb4GNb4(Fa6)GN;Asn
126	Fa3(Ab4)GNb2(GNb4)Ma3(Ma3(Ma6)Ma6)Mb4GNb4(Fa6)GN;Asn
127	Aa3Ab4GNb2(GNb4)Ma3(Ma3(Ma6)Ma6)Mb4GNb4(Fa6)GN;Asn
128	GNb2(NNa3Ab4GNb4)Ma3(Ma3(Ma6)Ma6)Mb4GNb4(Fa6)GN;Asn
129	GNb2(Fa3(Ab4)GNb4)Ma3(Ma3(Ma6)Ma6)Mb4GNb4(Fa6)GN;Asn
130	GNb2(Aa3Ab4GNb4)Ma3(Ma3(Ma6)Ma6)Mb4GNb4(Fa6)GN;Asn
131	Ab4GNb3Ab4GNb2Ma3(Ma3(Ma6)Ma6)Mb4GNb4(Fa6)GN;Asn
132	Fa3(NNa3Ab4)GNb2Ma3(Ma3(Ma6)Ma6)Mb4GNb4(Fa6)GN;Asn
133	Fa3(Aa3Ab4)GNb2Ma3(Ma3(Ma6)Ma6)Mb4GNb4(Fa6)GN;Asn
134	Ab4GNb3Ab4GNb2Ma3(GNb4)(Ma3(Ma6)Ma6)Mb4GNb4GN;Asn
135	Fa3(NNa3Ab4)GNb2Ma3(GNb4)(Ma3(Ma6)Ma6)Mb4GNb4GN;Asn
136	Fa3(Aa3Ab4)GNb2Ma3(GNb4)(Ma3(Ma6)Ma6)Mb4GNb4GN;Asn
137	Ab4GNb2(Ab4GNb4)Ma3(GNb4)(Ma3(Ma6)Ma6)Mb4GNb4GN;Asn
138	NNa3Ab4GNb2(GNb4)Ma3(GNb4)(Ma3(Ma6)Ma6)Mb4GNb4GN;Asn
139	GNb2(NNa3Ab4GNb4)Ma3(GNb4)(Ma3(Ma6)Ma6)Mb4GNb4GN;Asn
140	GNb3Ab4GNb2(Ab4GNb4)Ma3(Ma3(Ma6)Ma6)Mb4GNb4GN;Asn
141	Ab4GNb2(GNb3Ab4GNb4)Ma3(Ma3(Ma6)Ma6)Mb4GNb4GN;Asn
142	NNa3Ab4GNb2(Ab4GNb4)Ma3(Ma3(Ma6)Ma6)Mb4GNb4GN;Asn
143	Ab4GNb2(NNa3Ab4GNb4)Ma3(Ma3(Ma6)Ma6)Mb4GNb4GN;Asn
144	Fa3(Ab4)GNb2(Ab4GNb4)Ma3(Ma3(Ma6)Ma6)Mb4GNb4GN;Asn
145	Ab4GNb2(Fa3(Ab4)GNb4)Ma3(Ma3(Ma6)Ma6)Mb4GNb4GN;Asn
146	Aa3Ab4GNb2(Ab4GNb4)Ma3(Ma3(Ma6)Ma6)Mb4GNb4GN;Asn
147	Ab4GNb2(Aa3Ab4GNb4)Ma3(Ma3(Ma6)Ma6)Mb4GNb4GN;Asn
148	Fa3(NNa3Ab4)GNb2(GNb4)Ma3(Ma3(Ma6)Ma6)Mb4GNb4GN;Asn
149	GNb2(Fa3(NNa3Ab4)GNb4)Ma3(Ma3(Ma6)Ma6)Mb4GNb4GN;Asn
150	NNa3Ab4GNb3Ab4GNb2Ma3(Ma3(Ma6)Ma6)Mb4GNb4GN;Asn
151	Fa3(Ab4)GNb3Ab4GNb2Ma3(Ma3(Ma6)Ma6)Mb4GNb4GN;Asn
152	Fa3(Ab4GNb3Ab4)GNb2Ma3(Ma3(Ma6)Ma6)Mb4GNb4GN;Asn
153	Aa3Ab4GNb3Ab4GNb2Ma3(Ma3(Ma6)Ma6)Mb4GNb4GN;Asn
154	GNb2Ma3(GNb4)(GNb2Ma6)Mb4GNb4(Fa6)GN;Asn
155	GNb2(GNb4)Ma3(GNb2Ma6)Mb4GNb4(Fa6)GN;Asn
156	GNb2Ma3(GNb2(GNb6)Ma6)Mb4GNb4(Fa6)GN;Asn
157	Ab4GNb2Ma3(GNb2Ma6)Mb4GNb4(Fa6)GN;Asn
158	GNb2Ma3(Ab4GNb2Ma6)Mb4GNb4(Fa6)GN;Asn
159	Ab4GNb2Ma3(GNb4)(Ma6)Mb4GNb4(Fa6)GN;Asn
160	GNb2(GNb4)Ma3(GNb4)(Ma6)Mb4GNb4(Fa6)GN;Asn
161	Ab4GNb2(GNb4)Ma3(Ma6)Mb4GNb4(Fa6)GN;Asn
162	GNb2(Ab4GNb4)Ma3(Ma6)Mb4GNb4(Fa6)GN;Asn
163	GNb3Ab4GNb2Ma3(Ma6)Mb4GNb4(Fa6)GN;Asn
164	NNa3Ab4GNb2Ma3(Ma6)Mb4GNb4(Fa6)GN;Asn
165	Fa3(Ab4)GNb2Ma3(Ma6)Mb4GNb4(Fa6)GN;Asn
166	Aa3Ab4GNb2Ma3(Ma6)Mb4GNb4(Fa6)GN;Asn
167	Ab4GNb2Ma3(GNb4)(GNb2Ma6)Mb4GNb4GN;Asn
168	GNb2Ma3(GNb4)(Ab4GNb2Ma6)Mb4GNb4GN;Asn
169	GNb2(GNb4)Ma3(GNb4)(GNb2Ma6)Mb4GNb4GN;Asn
170	GNb2(GNb4)Ma3(GNb2(GNb6)Ma6)Mb4GNb4GN;Asn
171	Ab4GNb2(GNb4)Ma3(GNb2Ma6)Mb4GNb4GN;Asn
172	GNb2(Ab4GNb4)Ma3(GNb2Ma6)Mb4GNb4GN;Asn
173	GNb2(GNb4)Ma3(Ab4GNb2Ma6)Mb4GNb4GN;Asn
174	GNb2Ma3(GNb4)(GNb2(GNb6)Ma6)Mb4GNb4GN;Asn
175	Ab4GNb2Ma3(GNb2(GNb6)Ma6)Mb4GNb4GN;Asn
176	GNb2Ma3(Ab4GNb2(GNb6)Ma6)Mb4GNb4GN;Asn
177	GNb2Ma3(GNb2(Ab4GNb6)Ma6)Mb4GNb4GN;Asn
178	GNb3Ab4GNb2Ma3(GNb2Ma6)Mb4GNb4GN;Asn
179	Ab4GNb2Ma3(Ab4GNb2Ma6)Mb4GNb4GN;Asn
180	NNa3Ab4GNb2Ma3(GNb2Ma6)Mb4GNb4GN;Asn
181	Fa3(Ab4)GNb2Ma3(GNb2Ma6)Mb4GNb4GN;Asn
182	Aa3Ab4GNb2Ma3(GNb2Ma6)Mb4GNb4GN;Asn
183	GNb2Ma3(GNb3Ab4GNb2Ma6)Mb4GNb4GN;Asn
184	GNb2Ma3(NNa3Ab4GNb2Ma6)Mb4GNb4GN;Asn
185	GNb2Ma3(Fa3(Ab4)GNb2Ma6)Mb4GNb4GN;Asn
186	GNb2Ma3(Aa3Ab4GNb2Ma6)Mb4GNb4GN;Asn
187	NNa3Ab4GNb2Ma3(GNb4)(Ma6)Mb4GNb4GN;Asn
188	Fa3(Ab4)GNb2Ma3(GNb4)(Ma6)Mb4GNb4GN;Asn
189	Aa3Ab4GNb2Ma3(GNb4)(Ma6)Mb4GNb4GN;Asn
190	Ab4GNb2(GNb4)Ma3(GNb4)(Ma6)Mb4GNb4GN;Asn
191	GNb2(Ab4GNb4)Ma3(GNb4)(Ma6)Mb4GNb4GN;Asn
192	Ab4GNb2(Ab4GNb4)Ma3(Ma6)Mb4GNb4GN;Asn
193	NNa3Ab4GNb2(GNb4)Ma3(Ma6)Mb4GNb4GN;Asn
194	Fa3(Ab4)GNb2(GNb4)Ma3(Ma6)Mb4GNb4GN;Asn
195	Aa3Ab4GNb2(GNb4)Ma3(Ma6)Mb4GNb4GN;Asn
196	GNb2(GNb3Ab4GNb4)Ma3(Ma6)Mb4GNb4GN;Asn
197	GNb2(NNa3Ab4GNb4)Ma3(Ma6)Mb4GNb4GN;Asn
198	GNb2(Fa3(Ab4)GNb4)Ma3(Ma6)Mb4GNb4GN;Asn
199	GNb2(Aa3Ab4GNb4)Ma3(Ma6)Mb4GNb4GN;Asn
200	Ab4GNb3Ab4GNb2Ma3(Ma6)Mb4GNb4GN;Asn
201	Fa3(NNa3Ab4)GNb2Ma3(Ma6)Mb4GNb4GN;Asn
202	Fa3(Aa3Ab4)GNb2Ma3(Ma6)Mb4GNb4GN;Asn
203	Ab4GNb2(Ab4GNb4)Ma3(Ma6Ma6)Mb4GNb4(Fa6)GN;Asn
204	NNa3Ab4GNb2(GNb4)Ma3(Ma6Ma6)Mb4GNb4(Fa6)GN;Asn
205	Fa3(Ab4)GNb2(GNb4)Ma3(Ma6Ma6)Mb4GNb4(Fa6)GN;Asn
206	GNb2(NNa3Ab4GNb4)Ma3(Ma6Ma6)Mb4GNb4(Fa6)GN;Asn
207	GNb2(Fa3(Ab4)GNb4)Ma3(Ma6Ma6)Mb4GNb4(Fa6)GN;Asn
208	GNb2(Aa3Ab4GNb4)Ma3(Ma6Ma6)Mb4GNb4(Fa6)GN;Asn
209	Ab4GNb3Ab4GNb2Ma3(Ma6Ma6)Mb4GNb4(Fa6)GN;Asn
210	Fa3(NNa3Ab4)GNb2Ma3(Ma6Ma6)Mb4GNb4(Fa6)GN;Asn
211	Fa3(Aa3Ab4)GNb2Ma3(Ma6Ma6)Mb4GNb4(Fa6)GN;Asn
212	NNa3Ab4GNb2(Ab4GNb4)Ma3(Ma6Ma6)Mb4GNb4GN;Asn
213	Ab4GNb2(NNa3Ab4GNb4)Ma3(Ma6Ma6)Mb4GNb4GN;Asn
214	Fa3(Ab4)GNb2(Ab4GNb4)Ma3(Ma6Ma6)Mb4GNb4GN;Asn
215	Ab4GNb2(Fa3(Ab4)GNb4)Ma3(Ma6Ma6)Mb4GNb4GN;Asn
216	Aa3Ab4GNb2(Ab4GNb4)Ma3(Ma6Ma6)Mb4GNb4GN;Asn
217	Ab4GNb2(Aa3Ab4GNb4)Ma3(Ma6Ma6)Mb4GNb4GN;Asn
218	Fa3(NNa3Ab4)GNb2(GNb4)Ma3(Ma6Ma6)Mb4GNb4GN;Asn
219	GNb2(Fa3(NNa3Ab4)GNb4)Ma3(Ma6Ma6)Mb4GNb4GN;Asn
220	NNa3Ab4GNb3Ab4GNb2Ma3(Ma6Ma6)Mb4GNb4GN;Asn
221	Fa3(NNa3Ab4)GNb2Ma3(GNb4)(Ma3(Ma6)Ma6)Mb4GNb4(Fa6)GN;Asn
222	Fa3(Aa3Ab4)GNb2Ma3(GNb4)(Ma3(Ma6)Ma6)Mb4GNb4(Fa6)GN;Asn
223	NNa3Ab4GNb2(Ab4GNb4)Ma3(Ma3(Ma6)Ma6)Mb4GNb4(Fa6)GN;Asn
224	Ab4GNb2(NNa3Ab4GNb4)Ma3(Ma3(Ma6)Ma6)Mb4GNb4(Fa6)GN;Asn
225	Fa3(Ab4)GNb2(Ab4GNb4)Ma3(Ma3(Ma6)Ma6)Mb4GNb4(Fa6)GN;Asn
226	Ab4GNb2(Fa3(Ab4)GNb4)Ma3(Ma3(Ma6)Ma6)Mb4GNb4(Fa6)GN;Asn
227	NNa3Ab4GNb2(Ab4GNb4)Ma3(GNb4)(Ma3(Ma6)Ma6)Mb4GNb4GN;Asn
228	Ab4GNb2(NNa3Ab4GNb4)Ma3(GNb4)(Ma3(Ma6)Ma6)Mb4GNb4GN;Asn
229	NNa3Ab4GNb2(NNa3Ab4GNb4)Ma3(Ma3(Ma6)Ma6)Mb4GNb4GN;Asn
230	Fa3(NNa3Ab4)GNb2(Ab4GNb4)Ma3(Ma3(Ma6)Ma6)Mb4GNb4GN;Asn
231	NNa3Ab4GNb2(Fa3(Ab4)GNb4)Ma3(Ma3(Ma6)Ma6)Mb4GNb4GN;Asn
232	NNa3Ab4GNb2(Aa3Ab4GNb4)Ma3(Ma3(Ma6)Ma6)Mb4GNb4GN;Asn
233	Fa3(Ab4)GNb2(NNa3Ab4GNb4)Ma3(Ma3(Ma6)Ma6)Mb4GNb4GN;Asn
234	Ab4GNb2(Fa3(NNa3Ab4)GNb4)Ma3(Ma3(Ma6)Ma6)Mb4GNb4GN;Asn
235	Aa3Ab4GNb2(NNa3Ab4GNb4)Ma3(Ma3(Ma6)Ma6)Mb4GNb4GN;Asn
236	Fa3(Ab4)GNb2(Fa3(Ab4)GNb4)Ma3(Ma3(Ma6)Ma6)Mb4GNb4GN;Asn
237	Fa3(Fa3(Ab4)GNb3Ab4)GNb2Ma3(Ma3(Ma6)Ma6)Mb4GNb4GN;Asn
238	Ab4GNb2Ma3(GNb4)(GNb2Ma6)Mb4GNb4(Fa6)GN;Asn
239	GNb2Ma3(GNb4)(Ab4GNb2Ma6)Mb4GNb4(Fa6)GN;Asn
240	GNb2(GNb4)Ma3(GNb4)(GNb2Ma6)Mb4GNb4(Fa6)GN;Asn
241	GNb2(GNb4)Ma3(GNb2(GNb6)Ma6)Mb4GNb4(Fa6)GN;Asn
242	Ab4GNb2(GNb4)Ma3(GNb2Ma6)Mb4GNb4(Fa6)GN;Asn
243	GNb2(Ab4GNb4)Ma3(GNb2Ma6)Mb4GNb4(Fa6)GN;Asn
244	GNb2(GNb4)Ma3(Ab4GNb2Ma6)Mb4GNb4(Fa6)GN;Asn
245	GNb2Ma3(GNb4)(GNb2(GNb6)Ma6)Mb4GNb4(Fa6)GN;Asn
246	Ab4GNb2Ma3(GNb2(GNb6)Ma6)Mb4GNb4(Fa6)GN;Asn
247	GNb2Ma3(Ab4GNb2(GNb6)Ma6)Mb4GNb4(Fa6)GN;Asn
248	GNb2Ma3(GNb2(Ab4GNb6)Ma6)Mb4GNb4(Fa6)GN;Asn
249	GNb3Ab4GNb2Ma3(GNb2Ma6)Mb4GNb4(Fa6)GN;Asn
250	Ab4GNb2Ma3(Ab4GNb2Ma6)Mb4GNb4(Fa6)GN;Asn
251	NNa3Ab4GNb2Ma3(GNb2Ma6)Mb4GNb4(Fa6)GN;Asn
252	Fa3(Ab4)GNb2Ma3(GNb2Ma6)Mb4GNb4(Fa6)GN;Asn
253	Aa3Ab4GNb2Ma3(GNb2Ma6)Mb4GNb4(Fa6)GN;Asn
254	GNb2Ma3(GNb3Ab4GNb2Ma6)Mb4GNb4(Fa6)GN;Asn
255	GNb2Ma3(NNa3Ab4GNb2Ma6)Mb4GNb4(Fa6)GN;Asn
256	GNb2Ma3(Fa3(Ab4)GNb2Ma6)Mb4GNb4(Fa6)GN;Asn
257	GNb2Ma3(Aa3Ab4GNb2Ma6)Mb4GNb4(Fa6)GN;Asn
258	NNa3Ab4GNb2Ma3(GNb4)(Ma6)Mb4GNb4(Fa6)GN;Asn
259	Fa3(Ab4)GNb2Ma3(GNb4)(Ma6)Mb4GNb4(Fa6)GN;Asn
260	GNb2(Ab4GNb4)Ma3(GNb4)(Ma6)Mb4GNb4(Fa6)GN;Asn
261	Ab4GNb2(Ab4GNb4)Ma3(Ma6)Mb4GNb4(Fa6)GN;Asn
262	NNa3Ab4GNb2(GNb4)Ma3(Ma6)Mb4GNb4(Fa6)GN;Asn
263	Fa3(Ab4)GNb2(GNb4)Ma3(Ma6)Mb4GNb4(Fa6)GN;Asn
264	GNb2(NNa3Ab4GNb4)Ma3(Ma6)Mb4GNb4(Fa6)GN;Asn
265	GNb2(Fa3(Ab4)GNb4)Ma3(Ma6)Mb4GNb4(Fa6)GN;Asn
266	GNb2(Aa3Ab4GNb4)Ma3(Ma6)Mb4GNb4(Fa6)GN;Asn
267	Fa3(NNa3Ab4)GNb2Ma3(Ma6)Mb4GNb4(Fa6)GN;Asn
268	Fa3(Aa3Ab4)GNb2Ma3(Ma6)Mb4GNb4(Fa6)GN;Asn
269	GNb3Ab4GNb2Ma3(GNb4)(GNb2Ma6)Mb4GNb4GN;Asn
270	Ab4GNb2Ma3(GNb4)(Ab4GNb2Ma6)Mb4GNb4GN;Asn
271	NNa3Ab4GNb2Ma3(GNb4)(GNb2Ma6)Mb4GNb4GN;Asn
272	Fa3(Ab4)GNb2Ma3(GNb4)(GNb2Ma6)Mb4GNb4GN;Asn
273	Aa3Ab4GNb2Ma3(GNb4)(GNb2Ma6)Mb4GNb4GN;Asn
274	GNb2Ma3(GNb4)(GNb3Ab4GNb2Ma6)Mb4GNb4GN;Asn
275	GNb2Ma3(GNb4)(NNa3Ab4GNb2Ma6)Mb4GNb4GN;Asn
276	GNb2Ma3(GNb4)(Fa3(Ab4)GNb2Ma6)Mb4GNb4GN;Asn
277	GNb2Ma3(GNb4)(Aa3Ab4GNb2Ma6)Mb4GNb4GN;Asn
278	Ab4GNb2(GNb4)Ma3(GNb4)(GNb2Ma6)Mb4GNb4GN;Asn
279	GNb2(Ab4GNb4)Ma3(GNb4)(GNb2Ma6)Mb4GNb4GN;Asn
280	GNb2(GNb4)Ma3(GNb4)(Ab4GNb2Ma6)Mb4GNb4GN;Asn
281	GNb2(GNb4)Ma3(GNb4)(GNb2(GNb6)Ma6)Mb4GNb4GN;Asn
282	Ab4GNb2(GNb4)Ma3(GNb2(GNb6)Ma6)Mb4GNb4GN;Asn
283	GNb2(Ab4GNb4)Ma3(GNb2(GNb6)Ma6)Mb4GNb4GN;Asn
284	GNb2(GNb4)Ma3(Ab4GNb2(GNb6)Ma6)Mb4GNb4GN;Asn
285	GNb2(GNb4)Ma3(GNb2(Ab4GNb6)Ma6)Mb4GNb4GN;Asn
286	Ab4GNb2(Ab4GNb4)Ma3(GNb2Ma6)Mb4GNb4GN;Asn
287	Ab4GNb2(GNb4)Ma3(Ab4GNb2Ma6)Mb4GNb4GN;Asn
288	NNa3Ab4GNb2(GNb4)Ma3(GNb2Ma6)Mb4GNb4GN;Asn
289	Fa3(Ab4)GNb2(GNb4)Ma3(GNb2Ma6)Mb4GNb4GN;Asn
290	Aa3Ab4GNb2(GNb4)Ma3(GNb2Ma6)Mb4GNb4GN;Asn
291	GNb2(GNb3Ab4GNb4)Ma3(GNb2Ma6)Mb4GNb4GN;Asn
292	GNb2(Ab4GNb4)Ma3(Ab4GNb2Ma6)Mb4GNb4GN;Asn
293	GNb2(NNa3Ab4GNb4)Ma3(GNb2Ma6)Mb4GNb4GN;Asn
294	GNb2(Fa3(Ab4)GNb4)Ma3(GNb2Ma6)Mb4GNb4GN;Asn
295	GNb2(Aa3Ab4GNb4)Ma3(GNb2Ma6)Mb4GNb4GN;Asn
296	GNb2(GNb4)Ma3(NNa3Ab4GNb2Ma6)Mb4GNb4GN;Asn
297	GNb2(GNb4)Ma3(Fa3(Ab4)GNb2Ma6)Mb4GNb4GN;Asn
298	GNb2(GNb4)Ma3(Aa3Ab4GNb2Ma6)Mb4GNb4GN;Asn
299	Ab4GNb2Ma3(GNb4)(GNb2(GNb6)Ma6)Mb4GNb4GN;Asn
300	GNb2Ma3(GNb4)(Ab4GNb2(GNb6)Ma6)Mb4GNb4GN;Asn
301	GNb2Ma3(GNb4)(GNb2(Ab4GNb6)Ma6)Mb4GNb4GN;Asn
302	GNb3Ab4GNb2Ma3(GNb2(GNb6)Ma6)Mb4GNb4GN;Asn
303	Ab4GNb2Ma3(Ab4GNb2(GNb6)Ma6)Mb4GNb4GN;Asn
304	Ab4GNb2Ma3(GNb2(Ab4GNb6)Ma6)Mb4GNb4GN;Asn
305	NNa3Ab4GNb2Ma3(GNb2(GNb6)Ma6)Mb4GNb4GN;Asn
306	Fa3(Ab4)GNb2Ma3(GNb2(GNb6)Ma6)Mb4GNb4GN;Asn
307	Aa3Ab4GNb2Ma3(GNb2(GNb6)Ma6)Mb4GNb4GN;Asn
308	GNb2Ma3(GNb3Ab4GNb2(GNb6)Ma6)Mb4GNb4GN;Asn
309	GNb2Ma3(Ab4GNb2(Ab4GNb6)Ma6)Mb4GNb4GN;Asn
310	GNb2Ma3(NNa3Ab4GNb2(GNb6)Ma6)Mb4GNb4GN;Asn
311	GNb2Ma3(Fa3(Ab4)GNb2(GNb6)Ma6)Mb4GNb4GN;Asn
312	GNb2Ma3(Aa3Ab4GNb2(GNb6)Ma6)Mb4GNb4GN;Asn
313	GNb2Ma3(GNb2(GNb3Ab4GNb6)Ma6)Mb4GNb4GN;Asn
314	GNb2Ma3(GNb2(NNa3Ab4GNb6)Ma6)Mb4GNb4GN;Asn
315	GNb2Ma3(GNb2(Fa3(Ab4)GNb6)Ma6)Mb4GNb4GN;Asn
316	GNb2Ma3(GNb2(Aa3Ab4GNb6)Ma6)Mb4GNb4GN;Asn
317	Ab4GNb3Ab4GNb2Ma3(GNb2Ma6)Mb4GNb4GN;Asn
318	GNb3Ab4GNb2Ma3(Ab4GNb2Ma6)Mb4GNb4GN;Asn
319	Fa3(GNb3Ab4)GNb2Ma3(GNb2Ma6)Mb4GNb4GN;Asn
320	Ab4GNb2Ma3(GNb3Ab4GNb2Ma6)Mb4GNb4GN;Asn
321	NNa3Ab4GNb2Ma3(Ab4GNb2Ma6)Mb4GNb4GN;Asn
322	Ab4GNb2Ma3(NNa3Ab4GNb2Ma6)Mb4GNb4GN;Asn
323	Fa3(Ab4)GNb2Ma3(Ab4GNb2Ma6)Mb4GNb4GN;Asn
324	Ab4GNb2Ma3(Fa3(Ab4)GNb2Ma6)Mb4GNb4GN;Asn
325	Aa3Ab4GNb2Ma3(Ab4GNb2Ma6)Mb4GNb4GN;Asn
326	Ab4GNb2Ma3(Aa3Ab4GNb2Ma6)Mb4GNb4GN;Asn
327	Fa3(NNa3Ab4)GNb2Ma3(GNb2Ma6)Mb4GNb4GN;Asn
328	Fa3(Aa3Ab4)GNb2Ma3(GNb2Ma6)Mb4GNb4GN;Asn
329	GNb2Ma3(Ab4GNb3Ab4GNb2Ma6)Mb4GNb4GN;Asn
330	GNb2Ma3(Fa3(GNb3Ab4)GNb2Ma6)Mb4GNb4GN;Asn
331	GNb2Ma3(Fa3(NNa3Ab4)GNb2Ma6)Mb4GNb4GN;Asn
332	GNb2Ma3(Fa3(Aa3Ab4)GNb2Ma6)Mb4GNb4GN;Asn
333	Fa3(NNa3Ab4)GNb2Ma3(GNb4)(Ma6)Mb4GNb4GN;Asn
334	Fa3(Aa3Ab4)GNb2Ma3(GNb4)(Ma6)Mb4GNb4GN;Asn
335	NNa3Ab4GNb2(Ab4GNb4)Ma3(Ma6)Mb4GNb4GN;Asn
336	Ab4GNb2(NNa3Ab4GNb4)Ma3(Ma6)Mb4GNb4GN;Asn
337	Fa3(Ab4)GNb2(Ab4GNb4)Ma3(Ma6)Mb4GNb4GN;Asn
338	Ab4GNb2(Fa3(Ab4)GNb4)Ma3(Ma6)Mb4GNb4GN;Asn
339	Aa3Ab4GNb2(Ab4GNb4)Ma3(Ma6)Mb4GNb4GN;Asn
340	Ab4GNb2(Aa3Ab4GNb4)Ma3(Ma6)Mb4GNb4GN;Asn
341	GNb2(Fa3(NNa3Ab4)GNb4)Ma3(Ma6)Mb4GNb4GN;Asn
342	NNa3Ab4GNb2(Ab4GNb4)Ma3(Ma6Ma6)Mb4GNb4(Fa6)GN;Asn
343	Ab4GNb2(NNa3Ab4GNb4)Ma3(Ma6Ma6)Mb4GNb4(Fa6)GN;Asn
344	Fa3(Ab4)GNb2(Ab4GNb4)Ma3(Ma6Ma6)Mb4GNb4(Fa6)GN;Asn
345	Ab4GNb2(Fa3(Ab4)GNb4)Ma3(Ma6Ma6)Mb4GNb4(Fa6)GN;Asn
346	NNa3Ab4GNb2(NNa3Ab4GNb4)Ma3(Ma6Ma6)Mb4GNb4GN;Asn
347	Fa3(NNa3Ab4)GNb2(Ab4GNb4)Ma3(Ma6Ma6)Mb4GNb4GN;Asn
348	NNa3Ab4GNb2(Fa3(Ab4)GNb4)Ma3(Ma6Ma6)Mb4GNb4GN;Asn
349	Fa3(Ab4)GNb2(NNa3Ab4GNb4)Ma3(Ma6Ma6)Mb4GNb4GN;Asn
350	Ab4GNb2(Fa3(NNa3Ab4)GNb4)Ma3(Ma6Ma6)Mb4GNb4GN;Asn
351	Fa3(Ab4)GNb2(Fa3(Ab4)GNb4)Ma3(Ma6Ma6)Mb4GNb4GN;Asn
352	NNa3Ab4GNb2(NNa3Ab4GNb4)Ma3(Ma3(Ma6)Ma6)Mb4GNb4(Fa6)GN;Asn
353	Fa3(Ab4)GNb2(Fa3(Ab4)GNb4)Ma3(Ma3(Ma6)Ma6)Mb4GNb4(Fa6)GN;Asn
354	Fa3(NNa3Ab4)GNb2(Fa3(Ab4)GNb4)Ma3(Ma3(Ma6)Ma6)Mb4GNb4GN;Asn
355	Fa3(Ab4)GNb2(Fa3(NNa3Ab4)GNb4)Ma3(Ma3(Ma6)Ma6)Mb4GNb4GN;Asn
356	Ab4GNb2Ma3(GNb4)(Ab4GNb2Ma6)Mb4GNb4(Fa6)GN;Asn
357	NNa3Ab4GNb2Ma3(GNb4)(GNb2Ma6)Mb4GNb4(Fa6)GN;Asn
358	Fa3(Ab4)GNb2Ma3(GNb4)(GNb2Ma6)Mb4GNb4(Fa6)GN;Asn
359	Aa3Ab4GNb2Ma3(GNb4)(GNb2Ma6)Mb4GNb4(Fa6)GN;Asn
360	GNb2Ma3(GNb4)(NNa3Ab4GNb2Ma6)Mb4GNb4(Fa6)GN;Asn
361	GNb2Ma3(GNb4)(Fa3(Ab4)GNb2Ma6)Mb4GNb4(Fa6)GN;Asn
362	GNb2Ma3(GNb4)(Aa3Ab4GNb2Ma6)Mb4GNb4(Fa6)GN;Asn
363	Ab4GNb2(GNb4)Ma3(GNb4)(GNb2Ma6)Mb4GNb4(Fa6)GN;Asn
364	GNb2(Ab4GNb4)Ma3(GNb4)(GNb2Ma6)Mb4GNb4(Fa6)GN;Asn
365	GNb2(GNb4)Ma3(GNb4)(Ab4GNb2Ma6)Mb4GNb4(Fa6)GN;Asn
366	GNb2(GNb4)Ma3(GNb4)(GNb2(GNb6)Ma6)Mb4GNb4(Fa6)GN;Asn
367	Ab4GNb2(GNb4)Ma3(GNb2(GNb6)Ma6)Mb4GNb4(Fa6)GN;Asn
368	GNb2(Ab4GNb4)Ma3(GNb2(GNb6)Ma6)Mb4GNb4(Fa6)GN;Asn
369	GNb2(GNb4)Ma3(Ab4GNb2(GNb6)Ma6)Mb4GNb4(Fa6)GN;Asn
370	GNb2(GNb4)Ma3(GNb2(Ab4GNb6)Ma6)Mb4GNb4(Fa6)GN;Asn
371	Ab4GNb2(Ab4GNb4)Ma3(GNb2Ma6)Mb4GNb4(Fa6)GN;Asn
372	Ab4GNb2(GNb4)Ma3(Ab4GNb2Ma6)Mb4GNb4(Fa6)GN;Asn
373	NNa3Ab4GNb2(GNb4)Ma3(GNb2Ma6)Mb4GNb4(Fa6)GN;Asn
374	Fa3(Ab4)GNb2(GNb4)Ma3(GNb2Ma6)Mb4GNb4(Fa6)GN;Asn
375	Aa3Ab4GNb2(GNb4)Ma3(GNb2Ma6)Mb4GNb4(Fa6)GN;Asn
376	GNb2(Ab4GNb4)Ma3(Ab4GNb2Ma6)Mb4GNb4(Fa6)GN;Asn
377	GNb2(NNa3Ab4GNb4)Ma3(GNb2Ma6)Mb4GNb4(Fa6)GN;Asn
378	GNb2(Fa3(Ab4)GNb4)Ma3(GNb2Ma6)Mb4GNb4(Fa6)GN;Asn
379	GNb2(Aa3Ab4GNb4)Ma3(GNb2Ma6)Mb4GNb4(Fa6)GN;Asn
380	GNb2(GNb4)Ma3(NNa3Ab4GNb2Ma6)Mb4GNb4(Fa6)GN;Asn
381	GNb2(GNb4)Ma3(Fa3(Ab4)GNb2Ma6)Mb4GNb4(Fa6)GN;Asn
382	GNb2(GNb4)Ma3(Aa3Ab4GNb2Ma6)Mb4GNb4(Fa6)GN;Asn
383	Ab4GNb2Ma3(GNb4)(GNb2(GNb6)Ma6)Mb4GNb4(Fa6)GN;Asn
384	GNb2Ma3(GNb4)(Ab4GNb2(GNb6)Ma6)Mb4GNb4(Fa6)GN;Asn
385	GNb2Ma3(GNb4)(GNb2(Ab4GNb6)Ma6)Mb4GNb4(Fa6)GN;Asn
386	GNb3Ab4GNb2Ma3(GNb2(GNb6)Ma6)Mb4GNb4(Fa6)GN;Asn
387	Ab4GNb2Ma3(Ab4GNb2(GNb6)Ma6)Mb4GNb4(Fa6)GN;Asn
388	Ab4GNb2Ma3(GNb2(Ab4GNb6)Ma6)Mb4GNb4(Fa6)GN;Asn
389	NNa3Ab4GNb2Ma3(GNb2(GNb6)Ma6)Mb4GNb4(Fa6)GN;Asn
390	Fa3(Ab4)GNb2Ma3(GNb2(GNb6)Ma6)Mb4GNb4(Fa6)GN;Asn
391	Aa3Ab4GNb2Ma3(GNb2(GNb6)Ma6)Mb4GNb4(Fa6)GN;Asn
392	GNb2Ma3(GNb3Ab4GNb2(GNb6)Ma6)Mb4GNb4(Fa6)GN;Asn
393	GNb2Ma3(Ab4GNb2(Ab4GNb6)Ma6)Mb4GNb4(Fa6)GN;Asn
394	GNb2Ma3(NNa3Ab4GNb2(GNb6)Ma6)Mb4GNb4(Fa6)GN;Asn
395	GNb2Ma3(Fa3(Ab4)GNb2(GNb6)Ma6)Mb4GNb4(Fa6)GN;Asn
396	GNb2Ma3(Aa3Ab4GNb2(GNb6)Ma6)Mb4GNb4(Fa6)GN;Asn
397	GNb2Ma3(GNb2(GNb3Ab4GNb6)Ma6)Mb4GNb4(Fa6)GN;Asn
398	GNb2Ma3(GNb2(NNa3Ab4GNb6)Ma6)Mb4GNb4(Fa6)GN;Asn
399	GNb2Ma3(GNb2(Fa3(Ab4)GNb6)Ma6)Mb4GNb4(Fa6)GN;Asn
400	GNb2Ma3(GNb2(Aa3Ab4GNb6)Ma6)Mb4GNb4(Fa6)GN;Asn
401	Ab4GNb3Ab4GNb2Ma3(GNb2Ma6)Mb4GNb4(Fa6)GN;Asn
402	GNb3Ab4GNb2Ma3(Ab4GNb2Ma6)Mb4GNb4(Fa6)GN;Asn
403	Ab4GNb2Ma3(GNb3Ab4GNb2Ma6)Mb4GNb4(Fa6)GN;Asn
404	NNa3Ab4GNb2Ma3(Ab4GNb2Ma6)Mb4GNb4(Fa6)GN;Asn
405	Ab4GNb2Ma3(NNa3Ab4GNb2Ma6)Mb4GNb4(Fa6)GN;Asn
406	Fa3(Ab4)GNb2Ma3(Ab4GNb2Ma6)Mb4GNb4(Fa6)GN;Asn
407	Ab4GNb2Ma3(Fa3(Ab4)GNb2Ma6)Mb4GNb4(Fa6)GN;Asn
408	Aa3Ab4GNb2Ma3(Ab4GNb2Ma6)Mb4GNb4(Fa6)GN;Asn
409	Ab4GNb2Ma3(Aa3Ab4GNb2Ma6)Mb4GNb4(Fa6)GN;Asn
410	Fa3(NNa3Ab4)GNb2Ma3(GNb2Ma6)Mb4GNb4(Fa6)GN;Asn
411	Fa3(Aa3Ab4)GNb2Ma3(GNb2Ma6)Mb4GNb4(Fa6)GN;Asn
412	GNb2Ma3(Ab4GNb3Ab4GNb2Ma6)Mb4GNb4(Fa6)GN;Asn
413	GNb2Ma3(Fa3(NNa3Ab4)GNb2Ma6)Mb4GNb4(Fa6)GN;Asn
414	GNb2Ma3(Fa3(Aa3Ab4)GNb2Ma6)Mb4GNb4(Fa6)GN;Asn
415	Fa3(NNa3Ab4)GNb2Ma3(GNb4)(Ma6)Mb4GNb4(Fa6)GN;Asn
416	NNa3Ab4GNb2(Ab4GNb4)Ma3(Ma6)Mb4GNb4(Fa6)GN;Asn
417	Ab4GNb2(NNa3Ab4GNb4)Ma3(Ma6)Mb4GNb4(Fa6)GN;Asn
418	Fa3(Ab4)GNb2(Ab4GNb4)Ma3(Ma6)Mb4GNb4(Fa6)GN;Asn
419	Ab4GNb2(Fa3(Ab4)GNb4)Ma3(Ma6)Mb4GNb4(Fa6)GN;Asn
420	Ab4GNb2Ma3(GNb4)(GNb3Ab4GNb2Ma6)Mb4GNb4GN;Asn
421	NNa3Ab4GNb2Ma3(GNb4)(Ab4GNb2Ma6)Mb4GNb4GN;Asn
422	Ab4GNb2Ma3(GNb4)(NNa3Ab4GNb2Ma6)Mb4GNb4GN;Asn
423	Fa3(Ab4)GNb2Ma3(GNb4)(Ab4GNb2Ma6)Mb4GNb4GN;Asn
424	Ab4GNb2Ma3(GNb4)(Fa3(Ab4)GNb2Ma6)Mb4GNb4GN;Asn
425	Aa3Ab4GNb2Ma3(GNb4)(Ab4GNb2Ma6)Mb4GNb4GN;Asn
426	Ab4GNb2Ma3(GNb4)(Aa3Ab4GNb2Ma6)Mb4GNb4GN;Asn
427	Fa3(NNa3Ab4)GNb2Ma3(GNb4)(GNb2Ma6)Mb4GNb4GN;Asn
428	GNb2Ma3(GNb4)(Fa3(NNa3Ab4)GNb2Ma6)Mb4GNb4GN;Asn
429	Ab4GNb2(Ab4GNb4)Ma3(GNb4)(GNb2Ma6)Mb4GNb4GN;Asn
430	Ab4GNb2(GNb4)Ma3(GNb4)(Ab4GNb2Ma6)Mb4GNb4GN;Asn
431	NNa3Ab4GNb2(GNb4)Ma3(GNb4)(GNb2Ma6)Mb4GNb4GN;Asn
432	GNb2(Ab4GNb4)Ma3(GNb4)(Ab4GNb2Ma6)Mb4GNb4GN;Asn
433	GNb2(NNa3Ab4GNb4)Ma3(GNb4)(GNb2Ma6)Mb4GNb4GN;Asn
434	Ab4GNb2(GNb4)Ma3(GNb4)(GNb2(GNb6)Ma6)Mb4GNb4GN;Asn
435	GNb2(Ab4GNb4)Ma3(GNb4)(GNb2(GNb6)Ma6)Mb4GNb4GN;Asn
436	GNb2(GNb4)Ma3(GNb4)(Ab4GNb2(GNb6)Ma6)Mb4GNb4GN;Asn
437	GNb2(GNb4)Ma3(GNb4)(GNb2(Ab4GNb6)Ma6)Mb4GNb4GN;Asn
438	Ab4GNb2(Ab4GNb4)Ma3(GNb2(GNb6)Ma6)Mb4GNb4GN;Asn
439	Ab4GNb2(GNb4)Ma3(Ab4GNb2(GNb6)Ma6)Mb4GNb4GN;Asn
440	Ab4GNb2(GNb4)Ma3(GNb2(Ab4GNb6)Ma6)Mb4GNb4GN;Asn
441	NNa3Ab4GNb2(GNb4)Ma3(GNb2(GNb6)Ma6)Mb4GNb4GN;Asn
442	Fa3(Ab4)GNb2(GNb4)Ma3(GNb2(GNb6)Ma6)Mb4GNb4GN;Asn
443	Aa3Ab4GNb2(GNb4)Ma3(GNb2(GNb6)Ma6)Mb4GNb4GN;Asn
444	GNb2(GNb3Ab4GNb4)Ma3(GNb2(GNb6)Ma6)Mb4GNb4GN;Asn
445	GNb2(Ab4GNb4)Ma3(Ab4GNb2(GNb6)Ma6)Mb4GNb4GN;Asn
446	GNb2(Ab4GNb4)Ma3(GNb2(Ab4GNb6)Ma6)Mb4GNb4GN;Asn
447	GNb2(NNa3Ab4GNb4)Ma3(GNb2(GNb6)Ma6)Mb4GNb4GN;Asn
448	GNb2(Fa3(Ab4)GNb4)Ma3(GNb2(GNb6)Ma6)Mb4GNb4GN;Asn
449	GNb2(Aa3Ab4GNb4)Ma3(GNb2(GNb6)Ma6)Mb4GNb4GN;Asn
450	GNb2(GNb4)Ma3(GNb3Ab4GNb2(GNb6)Ma6)Mb4GNb4GN;Asn
451	GNb2(GNb4)Ma3(Ab4GNb2(Ab4GNb6)Ma6)Mb4GNb4GN;Asn
452	GNb2(GNb4)Ma3(NNa3Ab4GNb2(GNb6)Ma6)Mb4GNb4GN;Asn
453	GNb2(GNb4)Ma3(Fa3(Ab4)GNb2(GNb6)Ma6)Mb4GNb4GN;Asn
454	GNb2(GNb4)Ma3(Aa3Ab4GNb2(GNb6)Ma6)Mb4GNb4GN;Asn
455	GNb2(GNb4)Ma3(GNb2(GNb3Ab4GNb6)Ma6)Mb4GNb4GN;Asn
456	GNb2(GNb4)Ma3(GNb2(NNa3Ab4GNb6)Ma6)Mb4GNb4GN;Asn
457	GNb2(GNb4)Ma3(GNb2(Fa3(Ab4)GNb6)Ma6)Mb4GNb4GN;Asn
458	GNb2(GNb4)Ma3(GNb2(Aa3Ab4GNb6)Ma6)Mb4GNb4GN;Asn
459	GNb3Ab4GNb2(Ab4GNb4)Ma3(GNb2Ma6)Mb4GNb4GN;Asn
460	Ab4GNb2(GNb3Ab4GNb4)Ma3(GNb2Ma6)Mb4GNb4GN;Asn
461	Ab4GNb2(Ab4GNb4)Ma3(Ab4GNb2Ma6)Mb4GNb4GN;Asn
462	NNa3Ab4GNb2(Ab4GNb4)Ma3(GNb2Ma6)Mb4GNb4GN;Asn
463	Ab4GNb2(NNa3Ab4GNb4)Ma3(GNb2Ma6)Mb4GNb4GN;Asn
464	Fa3(Ab4)GNb2(Ab4GNb4)Ma3(GNb2Ma6)Mb4GNb4GN;Asn
465	Ab4GNb2(Fa3(Ab4)GNb4)Ma3(GNb2Ma6)Mb4GNb4GN;Asn
466	Aa3Ab4GNb2(Ab4GNb4)Ma3(GNb2Ma6)Mb4GNb4GN;Asn
467	Ab4GNb2(Aa3Ab4GNb4)Ma3(GNb2Ma6)Mb4GNb4GN;Asn
468	Ab4GNb2(GNb4)Ma3(GNb3Ab4GNb2Ma6)Mb4GNb4GN;Asn
469	NNa3Ab4GNb2(GNb4)Ma3(Ab4GNb2Ma6)Mb4GNb4GN;Asn
470	Ab4GNb2(GNb4)Ma3(NNa3Ab4GNb2Ma6)Mb4GNb4GN;Asn
471	Fa3(Ab4)GNb2(GNb4)Ma3(Ab4GNb2Ma6)Mb4GNb4GN;Asn
472	Ab4GNb2(GNb4)Ma3(Fa3(Ab4)GNb2Ma6)Mb4GNb4GN;Asn
473	Aa3Ab4GNb2(GNb4)Ma3(Ab4GNb2Ma6)Mb4GNb4GN;Asn
474	Ab4GNb2(GNb4)Ma3(Aa3Ab4GNb2Ma6)Mb4GNb4GN;Asn
475	GNb2(Ab4GNb3Ab4GNb4)Ma3(GNb2Ma6)Mb4GNb4GN;Asn
476	GNb2(GNb3Ab4GNb4)Ma3(Ab4GNb2Ma6)Mb4GNb4GN;Asn
477	GNb2(Ab4GNb4)Ma3(GNb3Ab4GNb2Ma6)Mb4GNb4GN;Asn
478	GNb2(NNa3Ab4GNb4)Ma3(Ab4GNb2Ma6)Mb4GNb4GN;Asn
479	GNb2(Ab4GNb4)Ma3(NNa3Ab4GNb2Ma6)Mb4GNb4GN;Asn
480	GNb2(Fa3(Ab4)GNb4)Ma3(Ab4GNb2Ma6)Mb4GNb4GN;Asn
481	GNb2(Ab4GNb4)Ma3(Fa3(Ab4)GNb2Ma6)Mb4GNb4GN;Asn
482	GNb2(Aa3Ab4GNb4)Ma3(Ab4GNb2Ma6)Mb4GNb4GN;Asn
483	GNb2(Ab4GNb4)Ma3(Aa3Ab4GNb2Ma6)Mb4GNb4GN;Asn
484	GNb2(Fa3(NNa3Ab4)GNb4)Ma3(GNb2Ma6)Mb4GNb4GN;Asn
485	Ab4GNb2Ma3(GNb4)(Ab4GNb2(GNb6)Ma6)Mb4GNb4GN;Asn
486	Ab4GNb2Ma3(GNb4)(GNb2(Ab4GNb6)Ma6)Mb4GNb4GN;Asn
487	NNa3Ab4GNb2Ma3(GNb4)(GNb2(GNb6)Ma6)Mb4GNb4GN;Asn
488	Fa3(Ab4)GNb2Ma3(GNb4)(GNb2(GNb6)Ma6)Mb4GNb4GN;Asn
489	Aa3Ab4GNb2Ma3(GNb4)(GNb2(GNb6)Ma6)Mb4GNb4GN;Asn
490	GNb2Ma3(GNb4)(GNb3Ab4GNb2(GNb6)Ma6)Mb4GNb4GN;Asn
491	GNb2Ma3(GNb4)(Ab4GNb2(Ab4GNb6)Ma6)Mb4GNb4GN;Asn
492	GNb2Ma3(GNb4)(NNa3Ab4GNb2(GNb6)Ma6)Mb4GNb4GN;Asn
493	GNb2Ma3(GNb4)(Fa3(Ab4)GNb2(GNb6)Ma6)Mb4GNb4GN;Asn
494	GNb2Ma3(GNb4)(Aa3Ab4GNb2(GNb6)Ma6)Mb4GNb4GN;Asn
495	GNb2Ma3(GNb4)(GNb2(GNb3Ab4GNb6)Ma6)Mb4GNb4GN;Asn
496	GNb2Ma3(GNb4)(GNb2(NNa3Ab4GNb6)Ma6)Mb4GNb4GN;Asn
497	GNb2Ma3(GNb4)(GNb2(Fa3(Ab4)GNb6)Ma6)Mb4GNb4GN;Asn
498	GNb2Ma3(GNb4)(GNb2(Aa3Ab4GNb6)Ma6)Mb4GNb4GN;Asn
499	Ab4GNb3Ab4GNb2Ma3(GNb2(GNb6)Ma6)Mb4GNb4GN;Asn
500	GNb3Ab4GNb2Ma3(Ab4GNb2(GNb6)Ma6)Mb4GNb4GN;Asn
501	GNb3Ab4GNb2Ma3(GNb2(Ab4GNb6)Ma6)Mb4GNb4GN;Asn
502	Ab4GNb2Ma3(GNb3Ab4GNb2(GNb6)Ma6)Mb4GNb4GN;Asn
503	Ab4GNb2Ma3(Ab4GNb2(Ab4GNb6)Ma6)Mb4GNb4GN;Asn
504	NNa3Ab4GNb2Ma3(Ab4GNb2(GNb6)Ma6)Mb4GNb4GN;Asn
505	Ab4GNb2Ma3(NNa3Ab4GNb2(GNb6)Ma6)Mb4GNb4GN;Asn
506	Fa3(Ab4)GNb2Ma3(Ab4GNb2(GNb6)Ma6)Mb4GNb4GN;Asn
507	Ab4GNb2Ma3(Fa3(Ab4)GNb2(GNb6)Ma6)Mb4GNb4GN;Asn
508	Aa3Ab4GNb2Ma3(Ab4GNb2(GNb6)Ma6)Mb4GNb4GN;Asn
509	Ab4GNb2Ma3(Aa3Ab4GNb2(GNb6)Ma6)Mb4GNb4GN;Asn
510	Ab4GNb2Ma3(GNb2(GNb3Ab4GNb6)Ma6)Mb4GNb4GN;Asn
511	NNa3Ab4GNb2Ma3(GNb2(Ab4GNb6)Ma6)Mb4GNb4GN;Asn
512	Ab4GNb2Ma3(GNb2(NNa3Ab4GNb6)Ma6)Mb4GNb4GN;Asn
513	Fa3(Ab4)GNb2Ma3(GNb2(Ab4GNb6)Ma6)Mb4GNb4GN;Asn
514	Ab4GNb2Ma3(GNb2(Fa3(Ab4)GNb6)Ma6)Mb4GNb4GN;Asn
515	Aa3Ab4GNb2Ma3(GNb2(Ab4GNb6)Ma6)Mb4GNb4GN;Asn
516	Ab4GNb2Ma3(GNb2(Aa3Ab4GNb6)Ma6)Mb4GNb4GN;Asn
517	Fa3(NNa3Ab4)GNb2Ma3(GNb2(GNb6)Ma6)Mb4GNb4GN;Asn
518	Fa3(Aa3Ab4)GNb2Ma3(GNb2(GNb6)Ma6)Mb4GNb4GN;Asn
519	GNb2Ma3(Ab4GNb3Ab4GNb2(GNb6)Ma6)Mb4GNb4GN;Asn
520	GNb2Ma3(GNb3Ab4GNb2(Ab4GNb6)Ma6)Mb4GNb4GN;Asn
521	GNb2Ma3(Ab4GNb2(GNb3Ab4GNb6)Ma6)Mb4GNb4GN;Asn
522	GNb2Ma3(NNa3Ab4GNb2(Ab4GNb6)Ma6)Mb4GNb4GN;Asn
523	GNb2Ma3(Ab4GNb2(NNa3Ab4GNb6)Ma6)Mb4GNb4GN;Asn
524	GNb2Ma3(Fa3(Ab4)GNb2(Ab4GNb6)Ma6)Mb4GNb4GN;Asn
525	GNb2Ma3(Ab4GNb2(Fa3(Ab4)GNb6)Ma6)Mb4GNb4GN;Asn
526	GNb2Ma3(Aa3Ab4GNb2(Ab4GNb6)Ma6)Mb4GNb4GN;Asn
527	GNb2Ma3(Ab4GNb2(Aa3Ab4GNb6)Ma6)Mb4GNb4GN;Asn
528	GNb2Ma3(Fa3(NNa3Ab4)GNb2(GNb6)Ma6)Mb4GNb4GN;Asn
529	GNb2Ma3(GNb2(Ab4GNb3Ab4GNb6)Ma6)Mb4GNb4GN;Asn
530	GNb2Ma3(GNb2(Fa3(GNb3Ab4)GNb6)Ma6)Mb4GNb4GN;Asn
531	GNb2Ma3(GNb2(Fa3(NNa3Ab4)GNb6)Ma6)Mb4GNb4GN;Asn
532	GNb2Ma3(GNb2(Fa3(Aa3Ab4)GNb6)Ma6)Mb4GNb4GN;Asn
533	Ab4GNb3Ab4GNb2Ma3(Ab4GNb2Ma6)Mb4GNb4GN;Asn
534	NNa3Ab4GNb3Ab4GNb2Ma3(GNb2Ma6)Mb4GNb4GN;Asn
535	Fa3(Ab4)GNb3Ab4GNb2Ma3(GNb2Ma6)Mb4GNb4GN;Asn
536	Fa3(Ab4GNb3Ab4)GNb2Ma3(GNb2Ma6)Mb4GNb4GN;Asn
537	GNb3Ab4GNb2Ma3(NNa3Ab4GNb2Ma6)Mb4GNb4GN;Asn
538	Fa3(GNb3Ab4)GNb2Ma3(Ab4GNb2Ma6)Mb4GNb4GN;Asn
539	GNb3Ab4GNb2Ma3(Fa3(Ab4)GNb2Ma6)Mb4GNb4GN;Asn
540	Ab4GNb2Ma3(Ab4GNb3Ab4GNb2Ma6)Mb4GNb4GN;Asn
541	NNa3Ab4GNb2Ma3(GNb3Ab4GNb2Ma6)Mb4GNb4GN;Asn
542	Fa3(Ab4)GNb2Ma3(GNb3Ab4GNb2Ma6)Mb4GNb4GN;Asn
543	Ab4GNb2Ma3(Fa3(GNb3Ab4)GNb2Ma6)Mb4GNb4GN;Asn
544	Aa3Ab4GNb2Ma3(GNb3Ab4GNb2Ma6)Mb4GNb4GN;Asn
545	NNa3Ab4GNb2Ma3(NNa3Ab4GNb2Ma6)Mb4GNb4GN;Asn
546	Fa3(NNa3Ab4)GNb2Ma3(Ab4GNb2Ma6)Mb4GNb4GN;Asn
547	NNa3Ab4GNb2Ma3(Fa3(Ab4)GNb2Ma6)Mb4GNb4GN;Asn
548	NNa3Ab4GNb2Ma3(Aa3Ab4GNb2Ma6)Mb4GNb4GN;Asn
549	Fa3(Ab4)GNb2Ma3(NNa3Ab4GNb2Ma6)Mb4GNb4GN;Asn
550	Ab4GNb2Ma3(Fa3(NNa3Ab4)GNb2Ma6)Mb4GNb4GN;Asn
551	Aa3Ab4GNb2Ma3(NNa3Ab4GNb2Ma6)Mb4GNb4GN;Asn
552	Fa3(Ab4)GNb2Ma3(Fa3(Ab4)GNb2Ma6)Mb4GNb4GN;Asn
553	Fa3(Ab4)GNb2Ma3(Aa3Ab4GNb2Ma6)Mb4GNb4GN;Asn
554	Aa3Ab4GNb2Ma3(Fa3(Ab4)GNb2Ma6)Mb4GNb4GN;Asn
555	Fa3(Aa3Ab4)GNb2Ma3(Ab4GNb2Ma6)Mb4GNb4GN;Asn
556	Aa3Ab4GNb2Ma3(Aa3Ab4GNb2Ma6)Mb4GNb4GN;Asn
557	Ab4GNb2Ma3(Fa3(Aa3Ab4)GNb2Ma6)Mb4GNb4GN;Asn
558	GNb2Ma3(NNa3Ab4GNb3Ab4GNb2Ma6)Mb4GNb4GN;Asn
559	GNb2Ma3(Fa3(Ab4GNb3Ab4)GNb2Ma6)Mb4GNb4GN;Asn
560	NNa3Ab4GNb2(NNa3Ab4GNb4)Ma3(Ma6)Mb4GNb4GN;Asn
561	NNa3Ab4GNb2(Fa3(Ab4)GNb4)Ma3(Ma6)Mb4GNb4GN;Asn
562	Fa3(Ab4)GNb2(NNa3Ab4GNb4)Ma3(Ma6)Mb4GNb4GN;Asn
563	Ab4GNb2(Fa3(NNa3Ab4)GNb4)Ma3(Ma6)Mb4GNb4GN;Asn
564	Fa3(Ab4)GNb2(Fa3(Ab4)GNb4)Ma3(Ma6)Mb4GNb4GN;Asn
565	Fa3(Ab4)GNb2(Fa3(Ab4)GNb4)Ma3(Ma6Ma6)Mb4GNb4(Fa6)GN;Asn
566	Fa3(NNa3Ab4)GNb2(Fa3(Ab4)GNb4)Ma3(Ma6Ma6)Mb4GNb4GN;Asn
567	Fa3(Ab4)GNb2(Fa3(NNa3Ab4)GNb4)Ma3(Ma6Ma6)Mb4GNb4GN;Asn
568	NNa3Ab4GNb2Ma3(GNb4)(Ab4GNb2Ma6)Mb4GNb4(Fa6)GN;Asn
569	Ab4GNb2Ma3(GNb4)(NNa3Ab4GNb2Ma6)Mb4GNb4(Fa6)GN;Asn
570	Fa3(Ab4)GNb2Ma3(GNb4)(Ab4GNb2Ma6)Mb4GNb4(Fa6)GN;Asn
571	Ab4GNb2Ma3(GNb4)(Fa3(Ab4)GNb2Ma6)Mb4GNb4(Fa6)GN;Asn
572	Aa3Ab4GNb2Ma3(GNb4)(Ab4GNb2Ma6)Mb4GNb4(Fa6)GN;Asn
573	Ab4GNb2Ma3(GNb4)(Aa3Ab4GNb2Ma6)Mb4GNb4(Fa6)GN;Asn
574	Fa3(NNa3Ab4)GNb2Ma3(GNb4)(GNb2Ma6)Mb4GNb4(Fa6)GN;Asn
575	Ab4GNb2(Ab4GNb4)Ma3(GNb4)(GNb2Ma6)Mb4GNb4(Fa6)GN;Asn
576	Ab4GNb2(GNb4)Ma3(GNb4)(Ab4GNb2Ma6)Mb4GNb4(Fa6)GN;Asn
577	NNa3Ab4GNb2(GNb4)Ma3(GNb4)(GNb2Ma6)Mb4GNb4(Fa6)GN;Asn
578	GNb2(Ab4GNb4)Ma3(GNb4)(Ab4GNb2Ma6)Mb4GNb4(Fa6)GN;Asn
579	GNb2(NNa3Ab4GNb4)Ma3(GNb4)(GNb2Ma6)Mb4GNb4(Fa6)GN;Asn
580	GNb2(Fa3(Ab4)GNb4)Ma3(GNb4)(GNb2Ma6)Mb4GNb4(Fa6)GN;Asn
581	Ab4GNb2(GNb4)Ma3(GNb4)(GNb2(GNb6)Ma6)Mb4GNb4(Fa6)GN;Asn
582	GNb2(Ab4GNb4)Ma3(GNb4)(GNb2(GNb6)Ma6)Mb4GNb4(Fa6)GN;Asn
583	GNb2(GNb4)Ma3(GNb4)(Ab4GNb2(GNb6)Ma6)Mb4GNb4(Fa6)GN;Asn
584	GNb2(GNb4)Ma3(GNb4)(GNb2(Ab4GNb6)Ma6)Mb4GNb4(Fa6)GN;Asn
585	Ab4GNb2(Ab4GNb4)Ma3(GNb2(GNb6)Ma6)Mb4GNb4(Fa6)GN;Asn
586	Ab4GNb2(GNb4)Ma3(Ab4GNb2(GNb6)Ma6)Mb4GNb4(Fa6)GN;Asn
587	Ab4GNb2(GNb4)Ma3(GNb2(Ab4GNb6)Ma6)Mb4GNb4(Fa6)GN;Asn
588	NNa3Ab4GNb2(GNb4)Ma3(GNb2(GNb6)Ma6)Mb4GNb4(Fa6)GN;Asn
589	Fa3(Ab4)GNb2(GNb4)Ma3(GNb2(GNb6)Ma6)Mb4GNb4(Fa6)GN;Asn
590	Aa3Ab4GNb2(GNb4)Ma3(GNb2(GNb6)Ma6)Mb4GNb4(Fa6)GN;Asn
591	GNb2(GNb3Ab4GNb4)Ma3(GNb2(GNb6)Ma6)Mb4GNb4(Fa6)GN;Asn
592	GNb2(Ab4GNb4)Ma3(Ab4GNb2(GNb6)Ma6)Mb4GNb4(Fa6)GN;Asn
593	GNb2(Ab4GNb4)Ma3(GNb2(Ab4GNb6)Ma6)Mb4GNb4(Fa6)GN;Asn
594	GNb2(NNa3Ab4GNb4)Ma3(GNb2(GNb6)Ma6)Mb4GNb4(Fa6)GN;Asn
595	GNb2(Fa3(Ab4)GNb4)Ma3(GNb2(GNb6)Ma6)Mb4GNb4(Fa6)GN;Asn
596	GNb2(Aa3Ab4GNb4)Ma3(GNb2(GNb6)Ma6)Mb4GNb4(Fa6)GN;Asn
597	GNb2(GNb4)Ma3(GNb3Ab4GNb2(GNb6)Ma6)Mb4GNb4(Fa6)GN;Asn
598	GNb2(GNb4)Ma3(Ab4GNb2(Ab4GNb6)Ma6)Mb4GNb4(Fa6)GN;Asn
599	GNb2(GNb4)Ma3(NNa3Ab4GNb2(GNb6)Ma6)Mb4GNb4(Fa6)GN;Asn
600	GNb2(GNb4)Ma3(Fa3(Ab4)GNb2(GNb6)Ma6)Mb4GNb4(Fa6)GN;Asn
601	GNb2(GNb4)Ma3(Aa3Ab4GNb2(GNb6)Ma6)Mb4GNb4(Fa6)GN;Asn
602	GNb2(GNb4)Ma3(GNb2(GNb3Ab4GNb6)Ma6)Mb4GNb4(Fa6)GN;Asn
603	GNb2(GNb4)Ma3(GNb2(NNa3Ab4GNb6)Ma6)Mb4GNb4(Fa6)GN;Asn
604	GNb2(GNb4)Ma3(GNb2(Fa3(Ab4)GNb6)Ma6)Mb4GNb4(Fa6)GN;Asn
605	GNb2(GNb4)Ma3(GNb2(Aa3Ab4GNb6)Ma6)Mb4GNb4(Fa6)GN;Asn
606	GNb3Ab4GNb2(Ab4GNb4)Ma3(GNb2Ma6)Mb4GNb4(Fa6)GN;Asn
607	Ab4GNb2(GNb3Ab4GNb4)Ma3(GNb2Ma6)Mb4GNb4(Fa6)GN;Asn
608	Ab4GNb2(Ab4GNb4)Ma3(Ab4GNb2Ma6)Mb4GNb4(Fa6)GN;Asn
609	NNa3Ab4GNb2(Ab4GNb4)Ma3(GNb2Ma6)Mb4GNb4(Fa6)GN;Asn
610	Ab4GNb2(NNa3Ab4GNb4)Ma3(GNb2Ma6)Mb4GNb4(Fa6)GN;Asn
611	Fa3(Ab4)GNb2(Ab4GNb4)Ma3(GNb2Ma6)Mb4GNb4(Fa6)GN;Asn
612	Ab4GNb2(Fa3(Ab4)GNb4)Ma3(GNb2Ma6)Mb4GNb4(Fa6)GN;Asn
613	Aa3Ab4GNb2(Ab4GNb4)Ma3(GNb2Ma6)Mb4GNb4(Fa6)GN;Asn
614	Ab4GNb2(Aa3Ab4GNb4)Ma3(GNb2Ma6)Mb4GNb4(Fa6)GN;Asn
615	NNa3Ab4GNb2(GNb4)Ma3(Ab4GNb2Ma6)Mb4GNb4(Fa6)GN;Asn
616	Ab4GNb2(GNb4)Ma3(NNa3Ab4GNb2Ma6)Mb4GNb4(Fa6)GN;Asn
617	Fa3(Ab4)GNb2(GNb4)Ma3(Ab4GNb2Ma6)Mb4GNb4(Fa6)GN;Asn
618	Ab4GNb2(GNb4)Ma3(Fa3(Ab4)GNb2Ma6)Mb4GNb4(Fa6)GN;Asn
619	Aa3Ab4GNb2(GNb4)Ma3(Ab4GNb2Ma6)Mb4GNb4(Fa6)GN;Asn
620	Ab4GNb2(GNb4)Ma3(Aa3Ab4GNb2Ma6)Mb4GNb4(Fa6)GN;Asn
621	GNb2(Ab4GNb4)Ma3(GNb3Ab4GNb2Ma6)Mb4GNb4(Fa6)GN;Asn
622	GNb2(NNa3Ab4GNb4)Ma3(Ab4GNb2Ma6)Mb4GNb4(Fa6)GN;Asn
623	GNb2(Ab4GNb4)Ma3(NNa3Ab4GNb2Ma6)Mb4GNb4(Fa6)GN;Asn
624	GNb2(Fa3(Ab4)GNb4)Ma3(Ab4GNb2Ma6)Mb4GNb4(Fa6)GN;Asn
625	GNb2(Ab4GNb4)Ma3(Fa3(Ab4)GNb2Ma6)Mb4GNb4(Fa6)GN;Asn
626	GNb2(Aa3Ab4GNb4)Ma3(Ab4GNb2Ma6)Mb4GNb4(Fa6)GN;Asn
627	GNb2(Ab4GNb4)Ma3(Aa3Ab4GNb2Ma6)Mb4GNb4(Fa6)GN;Asn
628	GNb2(Fa3(NNa3Ab4)GNb4)Ma3(GNb2Ma6)Mb4GNb4(Fa6)GN;Asn
629	Ab4GNb2Ma3(GNb4)(Ab4GNb2(GNb6)Ma6)Mb4GNb4(Fa6)GN;Asn
630	Ab4GNb2Ma3(GNb4)(GNb2(Ab4GNb6)Ma6)Mb4GNb4(Fa6)GN;Asn
631	NNa3Ab4GNb2Ma3(GNb4)(GNb2(GNb6)Ma6)Mb4GNb4(Fa6)GN;Asn
632	Fa3(Ab4)GNb2Ma3(GNb4)(GNb2(GNb6)Ma6)Mb4GNb4(Fa6)GN;Asn
633	Aa3Ab4GNb2Ma3(GNb4)(GNb2(GNb6)Ma6)Mb4GNb4(Fa6)GN;Asn
634	GNb2Ma3(GNb4)(Ab4GNb2(Ab4GNb6)Ma6)Mb4GNb4(Fa6)GN;Asn
635	GNb2Ma3(GNb4)(NNa3Ab4GNb2(GNb6)Ma6)Mb4GNb4(Fa6)GN;Asn
636	GNb2Ma3(GNb4)(Fa3(Ab4)GNb2(GNb6)Ma6)Mb4GNb4(Fa6)GN;Asn
637	GNb2Ma3(GNb4)(Aa3Ab4GNb2(GNb6)Ma6)Mb4GNb4(Fa6)GN;Asn
638	GNb2Ma3(GNb4)(GNb2(GNb3Ab4GNb6)Ma6)Mb4GNb4(Fa6)GN;Asn
639	GNb2Ma3(GNb4)(GNb2(NNa3Ab4GNb6)Ma6)Mb4GNb4(Fa6)GN;Asn
640	GNb2Ma3(GNb4)(GNb2(Fa3(Ab4)GNb6)Ma6)Mb4GNb4(Fa6)GN;Asn
641	GNb2Ma3(GNb4)(GNb2(Aa3Ab4GNb6)Ma6)Mb4GNb4(Fa6)GN;Asn
642	Ab4GNb3Ab4GNb2Ma3(GNb2(GNb6)Ma6)Mb4GNb4(Fa6)GN;Asn
643	GNb3Ab4GNb2Ma3(Ab4GNb2(GNb6)Ma6)Mb4GNb4(Fa6)GN;Asn
644	GNb3Ab4GNb2Ma3(GNb2(Ab4GNb6)Ma6)Mb4GNb4(Fa6)GN;Asn
645	Ab4GNb2Ma3(GNb3Ab4GNb2(GNb6)Ma6)Mb4GNb4(Fa6)GN;Asn
646	Ab4GNb2Ma3(Ab4GNb2(Ab4GNb6)Ma6)Mb4GNb4(Fa6)GN;Asn
647	NNa3Ab4GNb2Ma3(Ab4GNb2(GNb6)Ma6)Mb4GNb4(Fa6)GN;Asn
648	Ab4GNb2Ma3(NNa3Ab4GNb2(GNb6)Ma6)Mb4GNb4(Fa6)GN;Asn
649	Fa3(Ab4)GNb2Ma3(Ab4GNb2(GNb6)Ma6)Mb4GNb4(Fa6)GN;Asn
650	Ab4GNb2Ma3(Fa3(Ab4)GNb2(GNb6)Ma6)Mb4GNb4(Fa6)GN;Asn
651	Aa3Ab4GNb2Ma3(Ab4GNb2(GNb6)Ma6)Mb4GNb4(Fa6)GN;Asn
652	Ab4GNb2Ma3(Aa3Ab4GNb2(GNb6)Ma6)Mb4GNb4(Fa6)GN;Asn
653	Ab4GNb2Ma3(GNb2(GNb3Ab4GNb6)Ma6)Mb4GNb4(Fa6)GN;Asn
654	NNa3Ab4GNb2Ma3(GNb2(Ab4GNb6)Ma6)Mb4GNb4(Fa6)GN;Asn
655	Ab4GNb2Ma3(GNb2(NNa3Ab4GNb6)Ma6)Mb4GNb4(Fa6)GN;Asn
656	Fa3(Ab4)GNb2Ma3(GNb2(Ab4GNb6)Ma6)Mb4GNb4(Fa6)GN;Asn
657	Ab4GNb2Ma3(GNb2(Fa3(Ab4)GNb6)Ma6)Mb4GNb4(Fa6)GN;Asn
658	Aa3Ab4GNb2Ma3(GNb2(Ab4GNb6)Ma6)Mb4GNb4(Fa6)GN;Asn
659	Ab4GNb2Ma3(GNb2(Aa3Ab4GNb6)Ma6)Mb4GNb4(Fa6)GN;Asn
660	Fa3(NNa3Ab4)GNb2Ma3(GNb2(GNb6)Ma6)Mb4GNb4(Fa6)GN;Asn
661	Fa3(Aa3Ab4)GNb2Ma3(GNb2(GNb6)Ma6)Mb4GNb4(Fa6)GN;Asn
662	GNb2Ma3(Ab4GNb3Ab4GNb2(GNb6)Ma6)Mb4GNb4(Fa6)GN;Asn
663	GNb2Ma3(GNb3Ab4GNb2(Ab4GNb6)Ma6)Mb4GNb4(Fa6)GN;Asn
664	GNb2Ma3(Ab4GNb2(GNb3Ab4GNb6)Ma6)Mb4GNb4(Fa6)GN;Asn
665	GNb2Ma3(NNa3Ab4GNb2(Ab4GNb6)Ma6)Mb4GNb4(Fa6)GN;Asn
666	GNb2Ma3(Ab4GNb2(NNa3Ab4GNb6)Ma6)Mb4GNb4(Fa6)GN;Asn
667	GNb2Ma3(Fa3(Ab4)GNb2(Ab4GNb6)Ma6)Mb4GNb4(Fa6)GN;Asn
668	GNb2Ma3(Ab4GNb2(Fa3(Ab4)GNb6)Ma6)Mb4GNb4(Fa6)GN;Asn
669	GNb2Ma3(Aa3Ab4GNb2(Ab4GNb6)Ma6)Mb4GNb4(Fa6)GN;Asn
670	GNb2Ma3(Ab4GNb2(Aa3Ab4GNb6)Ma6)Mb4GNb4(Fa6)GN;Asn
671	GNb2Ma3(Fa3(NNa3Ab4)GNb2(GNb6)Ma6)Mb4GNb4(Fa6)GN;Asn
672	GNb2Ma3(GNb2(Ab4GNb3Ab4GNb6)Ma6)Mb4GNb4(Fa6)GN;Asn
673	GNb2Ma3(GNb2(Fa3(GNb3Ab4)GNb6)Ma6)Mb4GNb4(Fa6)GN;Asn
674	GNb2Ma3(GNb2(Fa3(NNa3Ab4)GNb6)Ma6)Mb4GNb4(Fa6)GN;Asn
675	GNb2Ma3(GNb2(Fa3(Aa3Ab4)GNb6)Ma6)Mb4GNb4(Fa6)GN;Asn
676	Ab4GNb3Ab4GNb2Ma3(Ab4GNb2Ma6)Mb4GNb4(Fa6)GN;Asn
677	NNa3Ab4GNb3Ab4GNb2Ma3(GNb2Ma6)Mb4GNb4(Fa6)GN;Asn
678	GNb3Ab4GNb2Ma3(NNa3Ab4GNb2Ma6)Mb4GNb4(Fa6)GN;Asn
679	Ab4GNb2Ma3(Ab4GNb3Ab4GNb2Ma6)Mb4GNb4(Fa6)GN;Asn
680	NNa3Ab4GNb2Ma3(GNb3Ab4GNb2Ma6)Mb4GNb4(Fa6)GN;Asn
681	Fa3(Ab4)GNb2Ma3(GNb3Ab4GNb2Ma6)Mb4GNb4(Fa6)GN;Asn
682	Ab4GNb2Ma3(Fa3(GNb3Ab4)GNb2Ma6)Mb4GNb4(Fa6)GN;Asn
683	NNa3Ab4GNb2Ma3(NNa3Ab4GNb2Ma6)Mb4GNb4(Fa6)GN;Asn
684	Fa3(NNa3Ab4)GNb2Ma3(Ab4GNb2Ma6)Mb4GNb4(Fa6)GN;Asn
685	NNa3Ab4GNb2Ma3(Fa3(Ab4)GNb2Ma6)Mb4GNb4(Fa6)GN;Asn
686	NNa3Ab4GNb2Ma3(Aa3Ab4GNb2Ma6)Mb4GNb4(Fa6)GN;Asn
687	Fa3(Ab4)GNb2Ma3(NNa3Ab4GNb2Ma6)Mb4GNb4(Fa6)GN;Asn
688	Ab4GNb2Ma3(Fa3(NNa3Ab4)GNb2Ma6)Mb4GNb4(Fa6)GN;Asn
689	Aa3Ab4GNb2Ma3(NNa3Ab4GNb2Ma6)Mb4GNb4(Fa6)GN;Asn
690	Fa3(Ab4)GNb2Ma3(Fa3(Ab4)GNb2Ma6)Mb4GNb4(Fa6)GN;Asn
691	Fa3(Ab4)GNb2Ma3(Aa3Ab4GNb2Ma6)Mb4GNb4(Fa6)GN;Asn
692	Aa3Ab4GNb2Ma3(Fa3(Ab4)GNb2Ma6)Mb4GNb4(Fa6)GN;Asn
693	Fa3(Aa3Ab4)GNb2Ma3(Ab4GNb2Ma6)Mb4GNb4(Fa6)GN;Asn
694	Aa3Ab4GNb2Ma3(Aa3Ab4GNb2Ma6)Mb4GNb4(Fa6)GN;Asn
695	Ab4GNb2Ma3(Fa3(Aa3Ab4)GNb2Ma6)Mb4GNb4(Fa6)GN;Asn
696	Fa3(Ab4)GNb2(Fa3(Ab4)GNb4)Ma3(Ma6)Mb4GNb4(Fa6)GN;Asn
697	NNa3Ab4GNb2Ma3(GNb4)(NNa3Ab4GNb2Ma6)Mb4GNb4GN;Asn
698	Fa3(NNa3Ab4)GNb2Ma3(GNb4)(Ab4GNb2Ma6)Mb4GNb4GN;Asn
699	NNa3Ab4GNb2Ma3(GNb4)(Fa3(Ab4)GNb2Ma6)Mb4GNb4GN;Asn
700	Fa3(Ab4)GNb2Ma3(GNb4)(NNa3Ab4GNb2Ma6)Mb4GNb4GN;Asn
701	Ab4GNb2Ma3(GNb4)(Fa3(NNa3Ab4)GNb2Ma6)Mb4GNb4GN;Asn
702	Fa3(Ab4)GNb2Ma3(GNb4)(Fa3(Ab4)GNb2Ma6)Mb4GNb4GN;Asn
703	Ab4GNb2(Ab4GNb4)Ma3(GNb4)(Ab4GNb2Ma6)Mb4GNb4GN;Asn
704	NNa3Ab4GNb2(Ab4GNb4)Ma3(GNb4)(GNb2Ma6)Mb4GNb4GN;Asn
705	Ab4GNb2(NNa3Ab4GNb4)Ma3(GNb4)(GNb2Ma6)Mb4GNb4GN;Asn
706	Fa3(Ab4)GNb2(Ab4GNb4)Ma3(GNb4)(GNb2Ma6)Mb4GNb4GN;Asn
707	Ab4GNb2(Fa3(Ab4)GNb4)Ma3(GNb4)(GNb2Ma6)Mb4GNb4GN;Asn
708	GNb2(NNa3Ab4GNb4)Ma3(GNb4)(Ab4GNb2Ma6)Mb4GNb4GN;Asn
709	Ab4GNb2(Ab4GNb4)Ma3(GNb4)(GNb2(GNb6)Ma6)Mb4GNb4GN;Asn
710	Ab4GNb2(GNb4)Ma3(GNb4)(Ab4GNb2(GNb6)Ma6)Mb4GNb4GN;Asn
711	Ab4GNb2(GNb4)Ma3(GNb4)(GNb2(Ab4GNb6)Ma6)Mb4GNb4GN;Asn
712	NNa3Ab4GNb2(GNb4)Ma3(GNb4)(GNb2(GNb6)Ma6)Mb4GNb4GN;Asn
713	GNb2(Ab4GNb4)Ma3(GNb4)(Ab4GNb2(GNb6)Ma6)Mb4GNb4GN;Asn
714	GNb2(Ab4GNb4)Ma3(GNb4)(GNb2(Ab4GNb6)Ma6)Mb4GNb4GN;Asn
715	GNb2(NNa3Ab4GNb4)Ma3(GNb4)(GNb2(GNb6)Ma6)Mb4GNb4GN;Asn
716	GNb2(GNb4)Ma3(GNb4)(Ab4GNb2(Ab4GNb6)Ma6)Mb4GNb4GN;Asn
717	GNb2(GNb4)Ma3(GNb4)(GNb2(NNa3Ab4GNb6)Ma6)Mb4GNb4GN;Asn
718	GNb3Ab4GNb2(Ab4GNb4)Ma3(GNb2(GNb6)Ma6)Mb4GNb4GN;Asn
719	Ab4GNb2(GNb3Ab4GNb4)Ma3(GNb2(GNb6)Ma6)Mb4GNb4GN;Asn
720	Ab4GNb2(Ab4GNb4)Ma3(Ab4GNb2(GNb6)Ma6)Mb4GNb4GN;Asn
721	Ab4GNb2(Ab4GNb4)Ma3(GNb2(Ab4GNb6)Ma6)Mb4GNb4GN;Asn
722	NNa3Ab4GNb2(Ab4GNb4)Ma3(GNb2(GNb6)Ma6)Mb4GNb4GN;Asn
723	Ab4GNb2(NNa3Ab4GNb4)Ma3(GNb2(GNb6)Ma6)Mb4GNb4GN;Asn
724	Fa3(Ab4)GNb2(Ab4GNb4)Ma3(GNb2(GNb6)Ma6)Mb4GNb4GN;Asn
725	Ab4GNb2(Fa3(Ab4)GNb4)Ma3(GNb2(GNb6)Ma6)Mb4GNb4GN;Asn
726	Aa3Ab4GNb2(Ab4GNb4)Ma3(GNb2(GNb6)Ma6)Mb4GNb4GN;Asn
727	Ab4GNb2(Aa3Ab4GNb4)Ma3(GNb2(GNb6)Ma6)Mb4GNb4GN;Asn
728	Ab4GNb2(GNb4)Ma3(GNb3Ab4GNb2(GNb6)Ma6)Mb4GNb4GN;Asn
729	Ab4GNb2(GNb4)Ma3(Ab4GNb2(Ab4GNb6)Ma6)Mb4GNb4GN;Asn
730	NNa3Ab4GNb2(GNb4)Ma3(Ab4GNb2(GNb6)Ma6)Mb4GNb4GN;Asn
731	Ab4GNb2(GNb4)Ma3(NNa3Ab4GNb2(GNb6)Ma6)Mb4GNb4GN;Asn
732	Fa3(Ab4)GNb2(GNb4)Ma3(Ab4GNb2(GNb6)Ma6)Mb4GNb4GN;Asn
733	Ab4GNb2(GNb4)Ma3(Fa3(Ab4)GNb2(GNb6)Ma6)Mb4GNb4GN;Asn
734	Aa3Ab4GNb2(GNb4)Ma3(Ab4GNb2(GNb6)Ma6)Mb4GNb4GN;Asn
735	Ab4GNb2(GNb4)Ma3(Aa3Ab4GNb2(GNb6)Ma6)Mb4GNb4GN;Asn
736	GNb3Ab4GNb2(GNb4)Ma3(GNb2(Ab4GNb6)Ma6)Mb4GNb4GN;Asn
737	Ab4GNb2(GNb4)Ma3(GNb2(GNb3Ab4GNb6)Ma6)Mb4GNb4GN;Asn
738	NNa3Ab4GNb2(GNb4)Ma3(GNb2(Ab4GNb6)Ma6)Mb4GNb4GN;Asn
739	Ab4GNb2(GNb4)Ma3(GNb2(NNa3Ab4GNb6)Ma6)Mb4GNb4GN;Asn
740	Fa3(Ab4)GNb2(GNb4)Ma3(GNb2(Ab4GNb6)Ma6)Mb4GNb4GN;Asn
741	Ab4GNb2(GNb4)Ma3(GNb2(Fa3(Ab4)GNb6)Ma6)Mb4GNb4GN;Asn
742	Aa3Ab4GNb2(GNb4)Ma3(GNb2(Ab4GNb6)Ma6)Mb4GNb4GN;Asn
743	Ab4GNb2(GNb4)Ma3(GNb2(Aa3Ab4GNb6)Ma6)Mb4GNb4GN;Asn
744	Fa3(NNa3Ab4)GNb2(GNb4)Ma3(GNb2(GNb6)Ma6)Mb4GNb4GN;Asn
745	GNb2(Ab4GNb3Ab4GNb4)Ma3(GNb2(GNb6)Ma6)Mb4GNb4GN;Asn
746	GNb2(GNb3Ab4GNb4)Ma3(Ab4GNb2(GNb6)Ma6)Mb4GNb4GN;Asn
747	GNb2(GNb3Ab4GNb4)Ma3(GNb2(Ab4GNb6)Ma6)Mb4GNb4GN;Asn
748	GNb2(Ab4GNb4)Ma3(GNb3Ab4GNb2(GNb6)Ma6)Mb4GNb4GN;Asn
749	GNb2(Ab4GNb4)Ma3(Ab4GNb2(Ab4GNb6)Ma6)Mb4GNb4GN;Asn
750	GNb2(NNa3Ab4GNb4)Ma3(Ab4GNb2(GNb6)Ma6)Mb4GNb4GN;Asn
751	GNb2(Ab4GNb4)Ma3(NNa3Ab4GNb2(GNb6)Ma6)Mb4GNb4GN;Asn
752	GNb2(Fa3(Ab4)GNb4)Ma3(Ab4GNb2(GNb6)Ma6)Mb4GNb4GN;Asn
753	GNb2(Ab4GNb4)Ma3(Fa3(Ab4)GNb2(GNb6)Ma6)Mb4GNb4GN;Asn
754	GNb2(Aa3Ab4GNb4)Ma3(Ab4GNb2(GNb6)Ma6)Mb4GNb4GN;Asn
755	GNb2(Ab4GNb4)Ma3(Aa3Ab4GNb2(GNb6)Ma6)Mb4GNb4GN;Asn
756	GNb2(Ab4GNb4)Ma3(GNb2(GNb3Ab4GNb6)Ma6)Mb4GNb4GN;Asn
757	GNb2(NNa3Ab4GNb4)Ma3(GNb2(Ab4GNb6)Ma6)Mb4GNb4GN;Asn
758	GNb2(Ab4GNb4)Ma3(GNb2(NNa3Ab4GNb6)Ma6)Mb4GNb4GN;Asn
759	GNb2(Fa3(Ab4)GNb4)Ma3(GNb2(Ab4GNb6)Ma6)Mb4GNb4GN;Asn
760	GNb2(Ab4GNb4)Ma3(GNb2(Fa3(Ab4)GNb6)Ma6)Mb4GNb4GN;Asn
761	GNb2(Aa3Ab4GNb4)Ma3(GNb2(Ab4GNb6)Ma6)Mb4GNb4GN;Asn
762	GNb2(Ab4GNb4)Ma3(GNb2(Aa3Ab4GNb6)Ma6)Mb4GNb4GN;Asn
763	GNb2(Fa3(NNa3Ab4)GNb4)Ma3(GNb2(GNb6)Ma6)Mb4GNb4GN;Asn
764	GNb2(GNb4)Ma3(Ab4GNb3Ab4GNb2(GNb6)Ma6)Mb4GNb4GN;Asn
765	GNb2(GNb4)Ma3(GNb3Ab4GNb2(Ab4GNb6)Ma6)Mb4GNb4GN;Asn
766	GNb2(GNb4)Ma3(Ab4GNb2(GNb3Ab4GNb6)Ma6)Mb4GNb4GN;Asn
767	GNb2(GNb4)Ma3(NNa3Ab4GNb2(Ab4GNb6)Ma6)Mb4GNb4GN;Asn
768	GNb2(GNb4)Ma3(Ab4GNb2(NNa3Ab4GNb6)Ma6)Mb4GNb4GN;Asn
769	GNb2(GNb4)Ma3(Fa3(Ab4)GNb2(Ab4GNb6)Ma6)Mb4GNb4GN;Asn
770	GNb2(GNb4)Ma3(Ab4GNb2(Fa3(Ab4)GNb6)Ma6)Mb4GNb4GN;Asn
771	GNb2(GNb4)Ma3(Aa3Ab4GNb2(Ab4GNb6)Ma6)Mb4GNb4GN;Asn
772	GNb2(GNb4)Ma3(Ab4GNb2(Aa3Ab4GNb6)Ma6)Mb4GNb4GN;Asn
773	GNb2(GNb4)Ma3(GNb2(Ab4GNb3Ab4GNb6)Ma6)Mb4GNb4GN;Asn
774	GNb2(GNb4)Ma3(GNb2(Fa3(NNa3Ab4)GNb6)Ma6)Mb4GNb4GN;Asn
775	Ab4GNb3Ab4GNb2(Ab4GNb4)Ma3(GNb2Ma6)Mb4GNb4GN;Asn
776	GNb3Ab4GNb2(Ab4GNb4)Ma3(Ab4GNb2Ma6)Mb4GNb4GN;Asn
777	Ab4GNb2(Ab4GNb3Ab4GNb4)Ma3(GNb2Ma6)Mb4GNb4GN;Asn
778	Ab4GNb2(GNb3Ab4GNb4)Ma3(Ab4GNb2Ma6)Mb4GNb4GN;Asn
779	Ab4GNb2(Ab4GNb4)Ma3(GNb3Ab4GNb2Ma6)Mb4GNb4GN;Asn
780	NNa3Ab4GNb2(Ab4GNb4)Ma3(Ab4GNb2Ma6)Mb4GNb4GN;Asn
781	Ab4GNb2(NNa3Ab4GNb4)Ma3(Ab4GNb2Ma6)Mb4GNb4GN;Asn
782	Ab4GNb2(Ab4GNb4)Ma3(NNa3Ab4GNb2Ma6)Mb4GNb4GN;Asn
783	Fa3(Ab4)GNb2(Ab4GNb4)Ma3(Ab4GNb2Ma6)Mb4GNb4GN;Asn
784	Ab4GNb2(Fa3(Ab4)GNb4)Ma3(Ab4GNb2Ma6)Mb4GNb4GN;Asn
785	Ab4GNb2(Ab4GNb4)Ma3(Fa3(Ab4)GNb2Ma6)Mb4GNb4GN;Asn
786	Aa3Ab4GNb2(Ab4GNb4)Ma3(Ab4GNb2Ma6)Mb4GNb4GN;Asn
787	Ab4GNb2(Aa3Ab4GNb4)Ma3(Ab4GNb2Ma6)Mb4GNb4GN;Asn
788	Ab4GNb2(Ab4GNb4)Ma3(Aa3Ab4GNb2Ma6)Mb4GNb4GN;Asn
789	NNa3Ab4GNb2(NNa3Ab4GNb4)Ma3(GNb2Ma6)Mb4GNb4GN;Asn
790	Fa3(NNa3Ab4)GNb2(Ab4GNb4)Ma3(GNb2Ma6)Mb4GNb4GN;Asn
791	NNa3Ab4GNb2(Fa3(Ab4)GNb4)Ma3(GNb2Ma6)Mb4GNb4GN;Asn
792	NNa3Ab4GNb2(Aa3Ab4GNb4)Ma3(GNb2Ma6)Mb4GNb4GN;Asn
793	Fa3(Ab4)GNb2(NNa3Ab4GNb4)Ma3(GNb2Ma6)Mb4GNb4GN;Asn
794	Ab4GNb2(Fa3(NNa3Ab4)GNb4)Ma3(GNb2Ma6)Mb4GNb4GN;Asn
795	Aa3Ab4GNb2(NNa3Ab4GNb4)Ma3(GNb2Ma6)Mb4GNb4GN;Asn
796	Fa3(Ab4)GNb2(Fa3(Ab4)GNb4)Ma3(GNb2Ma6)Mb4GNb4GN;Asn
797	Fa3(Ab4)GNb2(Aa3Ab4GNb4)Ma3(GNb2Ma6)Mb4GNb4GN;Asn
798	Aa3Ab4GNb2(Fa3(Ab4)GNb4)Ma3(GNb2Ma6)Mb4GNb4GN;Asn
799	Ab4GNb2(Fa3(Aa3Ab4)GNb4)Ma3(GNb2Ma6)Mb4GNb4GN;Asn
800	Ab4GNb2(GNb4)Ma3(Ab4GNb3Ab4GNb2Ma6)Mb4GNb4GN;Asn
801	NNa3Ab4GNb2(GNb4)Ma3(NNa3Ab4GNb2Ma6)Mb4GNb4GN;Asn
802	Fa3(NNa3Ab4)GNb2(GNb4)Ma3(Ab4GNb2Ma6)Mb4GNb4GN;Asn
803	NNa3Ab4GNb2(GNb4)Ma3(Fa3(Ab4)GNb2Ma6)Mb4GNb4GN;Asn
804	Fa3(Ab4)GNb2(GNb4)Ma3(NNa3Ab4GNb2Ma6)Mb4GNb4GN;Asn
805	Ab4GNb2(GNb4)Ma3(Fa3(NNa3Ab4)GNb2Ma6)Mb4GNb4GN;Asn
806	GNb2(Ab4GNb3Ab4GNb4)Ma3(Ab4GNb2Ma6)Mb4GNb4GN;Asn
807	GNb2(Ab4GNb4)Ma3(Ab4GNb3Ab4GNb2Ma6)Mb4GNb4GN;Asn
808	GNb2(NNa3Ab4GNb4)Ma3(NNa3Ab4GNb2Ma6)Mb4GNb4GN;Asn
809	GNb2(Fa3(NNa3Ab4)GNb4)Ma3(Ab4GNb2Ma6)Mb4GNb4GN;Asn
810	GNb2(NNa3Ab4GNb4)Ma3(Fa3(Ab4)GNb2Ma6)Mb4GNb4GN;Asn
811	GNb2(NNa3Ab4GNb4)Ma3(Aa3Ab4GNb2Ma6)Mb4GNb4GN;Asn
812	GNb2(Fa3(Ab4)GNb4)Ma3(NNa3Ab4GNb2Ma6)Mb4GNb4GN;Asn
813	GNb2(Ab4GNb4)Ma3(Fa3(NNa3Ab4)GNb2Ma6)Mb4GNb4GN;Asn
814	GNb2(Aa3Ab4GNb4)Ma3(NNa3Ab4GNb2Ma6)Mb4GNb4GN;Asn
815	GNb2(Fa3(Ab4)GNb4)Ma3(Fa3(Ab4)GNb2Ma6)Mb4GNb4GN;Asn
816	Ab4GNb2Ma3(GNb4)(GNb3Ab4GNb2(GNb6)Ma6)Mb4GNb4GN;Asn
817	Ab4GNb2Ma3(GNb4)(Ab4GNb2(Ab4GNb6)Ma6)Mb4GNb4GN;Asn
818	NNa3Ab4GNb2Ma3(GNb4)(Ab4GNb2(GNb6)Ma6)Mb4GNb4GN;Asn
819	Ab4GNb2Ma3(GNb4)(NNa3Ab4GNb2(GNb6)Ma6)Mb4GNb4GN;Asn
820	Fa3(Ab4)GNb2Ma3(GNb4)(Ab4GNb2(GNb6)Ma6)Mb4GNb4GN;Asn
821	Ab4GNb2Ma3(GNb4)(Fa3(Ab4)GNb2(GNb6)Ma6)Mb4GNb4GN;Asn
822	Aa3Ab4GNb2Ma3(GNb4)(Ab4GNb2(GNb6)Ma6)Mb4GNb4GN;Asn
823	Ab4GNb2Ma3(GNb4)(Aa3Ab4GNb2(GNb6)Ma6)Mb4GNb4GN;Asn
824	Ab4GNb2Ma3(GNb4)(GNb2(GNb3Ab4GNb6)Ma6)Mb4GNb4GN;Asn
825	NNa3Ab4GNb2Ma3(GNb4)(GNb2(Ab4GNb6)Ma6)Mb4GNb4GN;Asn
826	Ab4GNb2Ma3(GNb4)(GNb2(NNa3Ab4GNb6)Ma6)Mb4GNb4GN;Asn
827	Fa3(Ab4)GNb2Ma3(GNb4)(GNb2(Ab4GNb6)Ma6)Mb4GNb4GN;Asn
828	Ab4GNb2Ma3(GNb4)(GNb2(Fa3(Ab4)GNb6)Ma6)Mb4GNb4GN;Asn
829	Aa3Ab4GNb2Ma3(GNb4)(GNb2(Ab4GNb6)Ma6)Mb4GNb4GN;Asn
830	Ab4GNb2Ma3(GNb4)(GNb2(Aa3Ab4GNb6)Ma6)Mb4GNb4GN;Asn
831	Fa3(NNa3Ab4)GNb2Ma3(GNb4)(GNb2(GNb6)Ma6)Mb4GNb4GN;Asn
832	GNb2Ma3(GNb4)(GNb3Ab4GNb2(Ab4GNb6)Ma6)Mb4GNb4GN;Asn
833	GNb2Ma3(GNb4)(Ab4GNb2(GNb3Ab4GNb6)Ma6)Mb4GNb4GN;Asn
834	GNb2Ma3(GNb4)(NNa3Ab4GNb2(Ab4GNb6)Ma6)Mb4GNb4GN;Asn
835	GNb2Ma3(GNb4)(Ab4GNb2(NNa3Ab4GNb6)Ma6)Mb4GNb4GN;Asn
836	GNb2Ma3(GNb4)(Fa3(Ab4)GNb2(Ab4GNb6)Ma6)Mb4GNb4GN;Asn
837	GNb2Ma3(GNb4)(Ab4GNb2(Fa3(Ab4)GNb6)Ma6)Mb4GNb4GN;Asn
838	GNb2Ma3(GNb4)(Aa3Ab4GNb2(Ab4GNb6)Ma6)Mb4GNb4GN;Asn
839	GNb2Ma3(GNb4)(Ab4GNb2(Aa3Ab4GNb6)Ma6)Mb4GNb4GN;Asn
840	GNb2Ma3(GNb4)(GNb2(Ab4GNb3Ab4GNb6)Ma6)Mb4GNb4GN;Asn
841	GNb2Ma3(GNb4)(GNb2(Fa3(NNa3Ab4)GNb6)Ma6)Mb4GNb4GN;Asn
842	Ab4GNb3Ab4GNb2Ma3(Ab4GNb2(GNb6)Ma6)Mb4GNb4GN;Asn
843	Ab4GNb3Ab4GNb2Ma3(GNb2(Ab4GNb6)Ma6)Mb4GNb4GN;Asn
844	NNa3Ab4GNb3Ab4GNb2Ma3(GNb2(GNb6)Ma6)Mb4GNb4GN;Asn
845	Fa3(Ab4)GNb3Ab4GNb2Ma3(GNb2(GNb6)Ma6)Mb4GNb4GN;Asn
846	Fa3(Ab4GNb3Ab4)GNb2Ma3(GNb2(GNb6)Ma6)Mb4GNb4GN;Asn
847	GNb3Ab4GNb2Ma3(Ab4GNb2(Ab4GNb6)Ma6)Mb4GNb4GN;Asn
848	GNb3Ab4GNb2Ma3(NNa3Ab4GNb2(GNb6)Ma6)Mb4GNb4GN;Asn
849	GNb3Ab4GNb2Ma3(GNb2(NNa3Ab4GNb6)Ma6)Mb4GNb4GN;Asn
850	Fa3(GNb3Ab4)GNb2Ma3(GNb2(Ab4GNb6)Ma6)Mb4GNb4GN;Asn
851	GNb3Ab4GNb2Ma3(GNb2(Fa3(Ab4)GNb6)Ma6)Mb4GNb4GN;Asn
852	Ab4GNb2Ma3(Ab4GNb3Ab4GNb2(GNb6)Ma6)Mb4GNb4GN;Asn
853	Ab4GNb2Ma3(GNb3Ab4GNb2(Ab4GNb6)Ma6)Mb4GNb4GN;Asn
854	NNa3Ab4GNb2Ma3(GNb3Ab4GNb2(GNb6)Ma6)Mb4GNb4GN;Asn
855	Fa3(Ab4)GNb2Ma3(GNb3Ab4GNb2(GNb6)Ma6)Mb4GNb4GN;Asn
856	Ab4GNb2Ma3(Fa3(GNb3Ab4)GNb2(GNb6)Ma6)Mb4GNb4GN;Asn
857	Aa3Ab4GNb2Ma3(GNb3Ab4GNb2(GNb6)Ma6)Mb4GNb4GN;Asn
858	Ab4GNb2Ma3(Ab4GNb2(GNb3Ab4GNb6)Ma6)Mb4GNb4GN;Asn
859	NNa3Ab4GNb2Ma3(Ab4GNb2(Ab4GNb6)Ma6)Mb4GNb4GN;Asn
860	Ab4GNb2Ma3(NNa3Ab4GNb2(Ab4GNb6)Ma6)Mb4GNb4GN;Asn
861	Ab4GNb2Ma3(Ab4GNb2(NNa3Ab4GNb6)Ma6)Mb4GNb4GN;Asn
862	Fa3(Ab4)GNb2Ma3(Ab4GNb2(Ab4GNb6)Ma6)Mb4GNb4GN;Asn
863	Ab4GNb2Ma3(Fa3(Ab4)GNb2(Ab4GNb6)Ma6)Mb4GNb4GN;Asn
864	Ab4GNb2Ma3(Ab4GNb2(Fa3(Ab4)GNb6)Ma6)Mb4GNb4GN;Asn
865	Aa3Ab4GNb2Ma3(Ab4GNb2(Ab4GNb6)Ma6)Mb4GNb4GN;Asn
866	Ab4GNb2Ma3(Aa3Ab4GNb2(Ab4GNb6)Ma6)Mb4GNb4GN;Asn
867	Ab4GNb2Ma3(Ab4GNb2(Aa3Ab4GNb6)Ma6)Mb4GNb4GN;Asn
868	NNa3Ab4GNb2Ma3(NNa3Ab4GNb2(GNb6)Ma6)Mb4GNb4GN;Asn
869	Fa3(NNa3Ab4)GNb2Ma3(Ab4GNb2(GNb6)Ma6)Mb4GNb4GN;Asn
870	NNa3Ab4GNb2Ma3(Fa3(Ab4)GNb2(GNb6)Ma6)Mb4GNb4GN;Asn
871	NNa3Ab4GNb2Ma3(Aa3Ab4GNb2(GNb6)Ma6)Mb4GNb4GN;Asn
872	Fa3(Ab4)GNb2Ma3(NNa3Ab4GNb2(GNb6)Ma6)Mb4GNb4GN;Asn
873	Ab4GNb2Ma3(Fa3(NNa3Ab4)GNb2(GNb6)Ma6)Mb4GNb4GN;Asn
874	Aa3Ab4GNb2Ma3(NNa3Ab4GNb2(GNb6)Ma6)Mb4GNb4GN;Asn
875	Fa3(Ab4)GNb2Ma3(Fa3(Ab4)GNb2(GNb6)Ma6)Mb4GNb4GN;Asn
876	Fa3(Ab4)GNb2Ma3(Aa3Ab4GNb2(GNb6)Ma6)Mb4GNb4GN;Asn
877	Aa3Ab4GNb2Ma3(Fa3(Ab4)GNb2(GNb6)Ma6)Mb4GNb4GN;Asn
878	Fa3(Aa3Ab4)GNb2Ma3(Ab4GNb2(GNb6)Ma6)Mb4GNb4GN;Asn
879	Aa3Ab4GNb2Ma3(Aa3Ab4GNb2(GNb6)Ma6)Mb4GNb4GN;Asn
880	Ab4GNb2Ma3(Fa3(Aa3Ab4)GNb2(GNb6)Ma6)Mb4GNb4GN;Asn
881	Ab4GNb2Ma3(GNb2(Ab4GNb3Ab4GNb6)Ma6)Mb4GNb4GN;Asn
882	NNa3Ab4GNb2Ma3(GNb2(GNb3Ab4GNb6)Ma6)Mb4GNb4GN;Asn
883	Fa3(Ab4)GNb2Ma3(GNb2(GNb3Ab4GNb6)Ma6)Mb4GNb4GN;Asn
884	Ab4GNb2Ma3(GNb2(Fa3(GNb3Ab4)GNb6)Ma6)Mb4GNb4GN;Asn
885	Aa3Ab4GNb2Ma3(GNb2(GNb3Ab4GNb6)Ma6)Mb4GNb4GN;Asn
886	NNa3Ab4GNb2Ma3(GNb2(NNa3Ab4GNb6)Ma6)Mb4GNb4GN;Asn
887	Fa3(NNa3Ab4)GNb2Ma3(GNb2(Ab4GNb6)Ma6)Mb4GNb4GN;Asn
888	NNa3Ab4GNb2Ma3(GNb2(Fa3(Ab4)GNb6)Ma6)Mb4GNb4GN;Asn
889	NNa3Ab4GNb2Ma3(GNb2(Aa3Ab4GNb6)Ma6)Mb4GNb4GN;Asn
890	Fa3(Ab4)GNb2Ma3(GNb2(NNa3Ab4GNb6)Ma6)Mb4GNb4GN;Asn
891	Ab4GNb2Ma3(GNb2(Fa3(NNa3Ab4)GNb6)Ma6)Mb4GNb4GN;Asn
892	Aa3Ab4GNb2Ma3(GNb2(NNa3Ab4GNb6)Ma6)Mb4GNb4GN;Asn
893	Fa3(Ab4)GNb2Ma3(GNb2(Fa3(Ab4)GNb6)Ma6)Mb4GNb4GN;Asn
894	Fa3(Ab4)GNb2Ma3(GNb2(Aa3Ab4GNb6)Ma6)Mb4GNb4GN;Asn
895	Aa3Ab4GNb2Ma3(GNb2(Fa3(Ab4)GNb6)Ma6)Mb4GNb4GN;Asn
896	Fa3(Aa3Ab4)GNb2Ma3(GNb2(Ab4GNb6)Ma6)Mb4GNb4GN;Asn
897	Aa3Ab4GNb2Ma3(GNb2(Aa3Ab4GNb6)Ma6)Mb4GNb4GN;Asn
898	Ab4GNb2Ma3(GNb2(Fa3(Aa3Ab4)GNb6)Ma6)Mb4GNb4GN;Asn
899	GNb2Ma3(Ab4GNb3Ab4GNb2(Ab4GNb6)Ma6)Mb4GNb4GN;Asn
900	GNb2Ma3(NNa3Ab4GNb3Ab4GNb2(GNb6)Ma6)Mb4GNb4GN;Asn
901	GNb2Ma3(GNb3Ab4GNb2(GNb3Ab4GNb6)Ma6)Mb4GNb4GN;Asn
902	GNb2Ma3(GNb3Ab4GNb2(NNa3Ab4GNb6)Ma6)Mb4GNb4GN;Asn
903	GNb2Ma3(Fa3(GNb3Ab4)GNb2(Ab4GNb6)Ma6)Mb4GNb4GN;Asn
904	GNb2Ma3(GNb3Ab4GNb2(Fa3(Ab4)GNb6)Ma6)Mb4GNb4GN;Asn
905	GNb2Ma3(GNb3Ab4GNb2(Aa3Ab4GNb6)Ma6)Mb4GNb4GN;Asn
906	GNb2Ma3(Ab4GNb2(Ab4GNb3Ab4GNb6)Ma6)Mb4GNb4GN;Asn
907	GNb2Ma3(NNa3Ab4GNb2(GNb3Ab4GNb6)Ma6)Mb4GNb4GN;Asn
908	GNb2Ma3(Fa3(Ab4)GNb2(GNb3Ab4GNb6)Ma6)Mb4GNb4GN;Asn
909	GNb2Ma3(Ab4GNb2(Fa3(GNb3Ab4)GNb6)Ma6)Mb4GNb4GN;Asn
910	GNb2Ma3(Aa3Ab4GNb2(GNb3Ab4GNb6)Ma6)Mb4GNb4GN;Asn
911	GNb2Ma3(NNa3Ab4GNb2(NNa3Ab4GNb6)Ma6)Mb4GNb4GN;Asn
912	GNb2Ma3(Fa3(NNa3Ab4)GNb2(Ab4GNb6)Ma6)Mb4GNb4GN;Asn
913	GNb2Ma3(NNa3Ab4GNb2(Fa3(Ab4)GNb6)Ma6)Mb4GNb4GN;Asn
914	GNb2Ma3(NNa3Ab4GNb2(Aa3Ab4GNb6)Ma6)Mb4GNb4GN;Asn
915	GNb2Ma3(Fa3(Ab4)GNb2(NNa3Ab4GNb6)Ma6)Mb4GNb4GN;Asn
916	GNb2Ma3(Ab4GNb2(Fa3(NNa3Ab4)GNb6)Ma6)Mb4GNb4GN;Asn
917	GNb2Ma3(Aa3Ab4GNb2(NNa3Ab4GNb6)Ma6)Mb4GNb4GN;Asn
918	GNb2Ma3(Fa3(Ab4)GNb2(Fa3(Ab4)GNb6)Ma6)Mb4GNb4GN;Asn
919	GNb2Ma3(Fa3(Ab4)GNb2(Aa3Ab4GNb6)Ma6)Mb4GNb4GN;Asn
920	GNb2Ma3(Aa3Ab4GNb2(Fa3(Ab4)GNb6)Ma6)Mb4GNb4GN;Asn
921	GNb2Ma3(Fa3(Aa3Ab4)GNb2(Ab4GNb6)Ma6)Mb4GNb4GN;Asn
922	GNb2Ma3(Aa3Ab4GNb2(Aa3Ab4GNb6)Ma6)Mb4GNb4GN;Asn
923	GNb2Ma3(Ab4GNb2(Fa3(Aa3Ab4)GNb6)Ma6)Mb4GNb4GN;Asn
924	GNb2Ma3(GNb2(GNb3Ab4GNb3Ab4GNb6)Ma6)Mb4GNb4GN;Asn
925	GNb2Ma3(GNb2(NNa3Ab4GNb3Ab4GNb6)Ma6)Mb4GNb4GN;Asn
926	GNb2Ma3(GNb2(Fa3(Ab4)GNb3Ab4GNb6)Ma6)Mb4GNb4GN;Asn
927	GNb2Ma3(GNb2(Fa3(Ab4GNb3Ab4)GNb6)Ma6)Mb4GNb4GN;Asn
928	GNb2Ma3(GNb2(Aa3Ab4GNb3Ab4GNb6)Ma6)Mb4GNb4GN;Asn
929	NNa3Ab4GNb3Ab4GNb2Ma3(Ab4GNb2Ma6)Mb4GNb4GN;Asn
930	Ab4GNb3Ab4GNb2Ma3(NNa3Ab4GNb2Ma6)Mb4GNb4GN;Asn
931	Fa3(Ab4)GNb3Ab4GNb2Ma3(Ab4GNb2Ma6)Mb4GNb4GN;Asn
932	Fa3(Ab4GNb3Ab4)GNb2Ma3(Ab4GNb2Ma6)Mb4GNb4GN;Asn
933	Ab4GNb3Ab4GNb2Ma3(Fa3(Ab4)GNb2Ma6)Mb4GNb4GN;Asn
934	NNa3Ab4GNb2Ma3(Ab4GNb3Ab4GNb2Ma6)Mb4GNb4GN;Asn
935	Ab4GNb2Ma3(NNa3Ab4GNb3Ab4GNb2Ma6)Mb4GNb4GN;Asn
936	Fa3(Ab4)GNb2Ma3(Ab4GNb3Ab4GNb2Ma6)Mb4GNb4GN;Asn
937	Ab4GNb2Ma3(Fa3(Ab4)GNb3Ab4GNb2Ma6)Mb4GNb4GN;Asn
938	Ab4GNb2Ma3(Fa3(Ab4GNb3Ab4)GNb2Ma6)Mb4GNb4GN;Asn
939	Aa3Ab4GNb2Ma3(Ab4GNb3Ab4GNb2Ma6)Mb4GNb4GN;Asn
940	Ab4GNb2Ma3(Aa3Ab4GNb3Ab4GNb2Ma6)Mb4GNb4GN;Asn
941	Fa3(NNa3Ab4)GNb2Ma3(GNb3Ab4GNb2Ma6)Mb4GNb4GN;Asn
942	NNa3Ab4GNb2Ma3(Fa3(GNb3Ab4)GNb2Ma6)Mb4GNb4GN;Asn
943	Fa3(NNa3Ab4)GNb2Ma3(NNa3Ab4GNb2Ma6)Mb4GNb4GN;Asn
944	NNa3Ab4GNb2Ma3(Fa3(NNa3Ab4)GNb2Ma6)Mb4GNb4GN;Asn
945	Fa3(NNa3Ab4)GNb2Ma3(Fa3(Ab4)GNb2Ma6)Mb4GNb4GN;Asn
946	Fa3(NNa3Ab4)GNb2Ma3(Aa3Ab4GNb2Ma6)Mb4GNb4GN;Asn
947	NNa3Ab4GNb2Ma3(Fa3(Aa3Ab4)GNb2Ma6)Mb4GNb4GN;Asn
948	Fa3(Ab4)GNb2Ma3(Fa3(NNa3Ab4)GNb2Ma6)Mb4GNb4GN;Asn
949	Aa3Ab4GNb2Ma3(Fa3(NNa3Ab4)GNb2Ma6)Mb4GNb4GN;Asn
950	Fa3(Aa3Ab4)GNb2Ma3(NNa3Ab4GNb2Ma6)Mb4GNb4GN;Asn
951	Fa3(Ab4)GNb2Ma3(Fa3(Aa3Ab4)GNb2Ma6)Mb4GNb4GN;Asn
952	Fa3(Aa3Ab4)GNb2Ma3(Fa3(Ab4)GNb2Ma6)Mb4GNb4GN;Asn
953	Fa3(NNa3Ab4)GNb2(Fa3(Ab4)GNb4)Ma3(Ma6)Mb4GNb4GN;Asn
954	Fa3(Ab4)GNb2(Fa3(NNa3Ab4)GNb4)Ma3(Ma6)Mb4GNb4GN;Asn
955	NNa3Ab4GNb2Ma3(GNb4)(NNa3Ab4GNb2Ma6)Mb4GNb4(Fa6)GN;Asn
956	Fa3(NNa3Ab4)GNb2Ma3(GNb4)(Ab4GNb2Ma6)Mb4GNb4(Fa6)GN;Asn
957	NNa3Ab4GNb2Ma3(GNb4)(Fa3(Ab4)GNb2Ma6)Mb4GNb4(Fa6)GN;Asn
958	Fa3(Ab4)GNb2Ma3(GNb4)(NNa3Ab4GNb2Ma6)Mb4GNb4(Fa6)GN;Asn
959	Fa3(Ab4)GNb2Ma3(GNb4)(Fa3(Ab4)GNb2Ma6)Mb4GNb4(Fa6)GN;Asn
960	Ab4GNb2(Ab4GNb4)Ma3(GNb4)(Ab4GNb2Ma6)Mb4GNb4(Fa6)GN;Asn
961	NNa3Ab4GNb2(Ab4GNb4)Ma3(GNb4)(GNb2Ma6)Mb4GNb4(Fa6)GN;Asn
962	Ab4GNb2(NNa3Ab4GNb4)Ma3(GNb4)(GNb2Ma6)Mb4GNb4(Fa6)GN;Asn
963	Fa3(Ab4)GNb2(Ab4GNb4)Ma3(GNb4)(GNb2Ma6)Mb4GNb4(Fa6)GN;Asn
964	Ab4GNb2(Fa3(Ab4)GNb4)Ma3(GNb4)(GNb2Ma6)Mb4GNb4(Fa6)GN;Asn
965	NNa3Ab4GNb2(GNb4)Ma3(GNb4)(Ab4GNb2Ma6)Mb4GNb4(Fa6)GN;Asn
966	Ab4GNb2(GNb4)Ma3(GNb4)(NNa3Ab4GNb2Ma6)Mb4GNb4(Fa6)GN;Asn
967	GNb2(NNa3Ab4GNb4)Ma3(GNb4)(Ab4GNb2Ma6)Mb4GNb4(Fa6)GN;Asn
968	GNb2(Ab4GNb4)Ma3(GNb4)(NNa3Ab4GNb2Ma6)Mb4GNb4(Fa6)GN;Asn
969	Ab4GNb2(Ab4GNb4)Ma3(GNb4)(GNb2(GNb6)Ma6)Mb4GNb4(Fa6)GN;Asn
970	Ab4GNb2(GNb4)Ma3(GNb4)(Ab4GNb2(GNb6)Ma6)Mb4GNb4(Fa6)GN;Asn
971	Ab4GNb2(GNb4)Ma3(GNb4)(GNb2(Ab4GNb6)Ma6)Mb4GNb4(Fa6)GN;Asn
972	NNa3Ab4GNb2(GNb4)Ma3(GNb4)(GNb2(GNb6)Ma6)Mb4GNb4(Fa6)GN;Asn
973	Fa3(Ab4)GNb2(GNb4)Ma3(GNb4)(GNb2(GNb6)Ma6)Mb4GNb4(Fa6)GN;Asn
974	GNb2(Ab4GNb4)Ma3(GNb4)(Ab4GNb2(GNb6)Ma6)Mb4GNb4(Fa6)GN;Asn
975	GNb2(Ab4GNb4)Ma3(GNb4)(GNb2(Ab4GNb6)Ma6)Mb4GNb4(Fa6)GN;Asn
976	GNb2(NNa3Ab4GNb4)Ma3(GNb4)(GNb2(GNb6)Ma6)Mb4GNb4(Fa6)GN;Asn
977	GNb2(Fa3(Ab4)GNb4)Ma3(GNb4)(GNb2(GNb6)Ma6)Mb4GNb4(Fa6)GN;Asn
978	GNb2(GNb4)Ma3(GNb4)(Ab4GNb2(Ab4GNb6)Ma6)Mb4GNb4(Fa6)GN;Asn
979	GNb2(GNb4)Ma3(GNb4)(NNa3Ab4GNb2(GNb6)Ma6)Mb4GNb4(Fa6)GN;Asn
980	GNb2(GNb4)Ma3(GNb4)(GNb2(NNa3Ab4GNb6)Ma6)Mb4GNb4(Fa6)GN;Asn
981	GNb2(GNb4)Ma3(GNb4)(GNb2(Fa3(Ab4)GNb6)Ma6)Mb4GNb4(Fa6)GN;Asn
982	GNb3Ab4GNb2(Ab4GNb4)Ma3(GNb2(GNb6)Ma6)Mb4GNb4(Fa6)GN;Asn
983	Ab4GNb2(GNb3Ab4GNb4)Ma3(GNb2(GNb6)Ma6)Mb4GNb4(Fa6)GN;Asn
984	Ab4GNb2(Ab4GNb4)Ma3(Ab4GNb2(GNb6)Ma6)Mb4GNb4(Fa6)GN;Asn
985	Ab4GNb2(Ab4GNb4)Ma3(GNb2(Ab4GNb6)Ma6)Mb4GNb4(Fa6)GN;Asn
986	NNa3Ab4GNb2(Ab4GNb4)Ma3(GNb2(GNb6)Ma6)Mb4GNb4(Fa6)GN;Asn
987	Ab4GNb2(NNa3Ab4GNb4)Ma3(GNb2(GNb6)Ma6)Mb4GNb4(Fa6)GN;Asn
988	Fa3(Ab4)GNb2(Ab4GNb4)Ma3(GNb2(GNb6)Ma6)Mb4GNb4(Fa6)GN;Asn
989	Ab4GNb2(Fa3(Ab4)GNb4)Ma3(GNb2(GNb6)Ma6)Mb4GNb4(Fa6)GN;Asn
990	Aa3Ab4GNb2(Ab4GNb4)Ma3(GNb2(GNb6)Ma6)Mb4GNb4(Fa6)GN;Asn
991	Ab4GNb2(Aa3Ab4GNb4)Ma3(GNb2(GNb6)Ma6)Mb4GNb4(Fa6)GN;Asn
992	Ab4GNb2(GNb4)Ma3(GNb3Ab4GNb2(GNb6)Ma6)Mb4GNb4(Fa6)GN;Asn
993	Ab4GNb2(GNb4)Ma3(Ab4GNb2(Ab4GNb6)Ma6)Mb4GNb4(Fa6)GN;Asn
994	NNa3Ab4GNb2(GNb4)Ma3(Ab4GNb2(GNb6)Ma6)Mb4GNb4(Fa6)GN;Asn
995	Ab4GNb2(GNb4)Ma3(NNa3Ab4GNb2(GNb6)Ma6)Mb4GNb4(Fa6)GN;Asn
996	Fa3(Ab4)GNb2(GNb4)Ma3(Ab4GNb2(GNb6)Ma6)Mb4GNb4(Fa6)GN;Asn
997	Ab4GNb2(GNb4)Ma3(Fa3(Ab4)GNb2(GNb6)Ma6)Mb4GNb4(Fa6)GN;Asn
998	Aa3Ab4GNb2(GNb4)Ma3(Ab4GNb2(GNb6)Ma6)Mb4GNb4(Fa6)GN;Asn
999	Ab4GNb2(GNb4)Ma3(Aa3Ab4GNb2(GNb6)Ma6)Mb4GNb4(Fa6)GN;Asn
1000	GNb3Ab4GNb2(GNb4)Ma3(GNb2(Ab4GNb6)Ma6)Mb4GNb4(Fa6)GN;Asn
1001	Ab4GNb2(GNb4)Ma3(GNb2(GNb3Ab4GNb6)Ma6)Mb4GNb4(Fa6)GN;Asn
1002	NNa3Ab4GNb2(GNb4)Ma3(GNb2(Ab4GNb6)Ma6)Mb4GNb4(Fa6)GN;Asn
1003	Ab4GNb2(GNb4)Ma3(GNb2(NNa3Ab4GNb6)Ma6)Mb4GNb4(Fa6)GN;Asn
1004	Fa3(Ab4)GNb2(GNb4)Ma3(GNb2(Ab4GNb6)Ma6)Mb4GNb4(Fa6)GN;Asn
1005	Ab4GNb2(GNb4)Ma3(GNb2(Fa3(Ab4)GNb6)Ma6)Mb4GNb4(Fa6)GN;Asn
1006	Aa3Ab4GNb2(GNb4)Ma3(GNb2(Ab4GNb6)Ma6)Mb4GNb4(Fa6)GN;Asn
1007	Ab4GNb2(GNb4)Ma3(GNb2(Aa3Ab4GNb6)Ma6)Mb4GNb4(Fa6)GN;Asn
1008	Fa3(NNa3Ab4)GNb2(GNb4)Ma3(GNb2(GNb6)Ma6)Mb4GNb4(Fa6)GN;Asn
1009	GNb2(Ab4GNb3Ab4GNb4)Ma3(GNb2(GNb6)Ma6)Mb4GNb4(Fa6)GN;Asn
1010	GNb2(GNb3Ab4GNb4)Ma3(Ab4GNb2(GNb6)Ma6)Mb4GNb4(Fa6)GN;Asn
1011	GNb2(GNb3Ab4GNb4)Ma3(GNb2(Ab4GNb6)Ma6)Mb4GNb4(Fa6)GN;Asn
1012	GNb2(Ab4GNb4)Ma3(GNb3Ab4GNb2(GNb6)Ma6)Mb4GNb4(Fa6)GN;Asn
1013	GNb2(Ab4GNb4)Ma3(Ab4GNb2(Ab4GNb6)Ma6)Mb4GNb4(Fa6)GN;Asn
1014	GNb2(NNa3Ab4GNb4)Ma3(Ab4GNb2(GNb6)Ma6)Mb4GNb4(Fa6)GN;Asn
1015	GNb2(Ab4GNb4)Ma3(NNa3Ab4GNb2(GNb6)Ma6)Mb4GNb4(Fa6)GN;Asn
1016	GNb2(Fa3(Ab4)GNb4)Ma3(Ab4GNb2(GNb6)Ma6)Mb4GNb4(Fa6)GN;Asn
1017	GNb2(Ab4GNb4)Ma3(Fa3(Ab4)GNb2(GNb6)Ma6)Mb4GNb4(Fa6)GN;Asn
1018	GNb2(Aa3Ab4GNb4)Ma3(Ab4GNb2(GNb6)Ma6)Mb4GNb4(Fa6)GN;Asn
1019	GNb2(Ab4GNb4)Ma3(Aa3Ab4GNb2(GNb6)Ma6)Mb4GNb4(Fa6)GN;Asn
1020	GNb2(Ab4GNb4)Ma3(GNb2(GNb3Ab4GNb6)Ma6)Mb4GNb4(Fa6)GN;Asn
1021	GNb2(NNa3Ab4GNb4)Ma3(GNb2(Ab4GNb6)Ma6)Mb4GNb4(Fa6)GN;Asn
1022	GNb2(Ab4GNb4)Ma3(GNb2(NNa3Ab4GNb6)Ma6)Mb4GNb4(Fa6)GN;Asn
1023	GNb2(Fa3(Ab4)GNb4)Ma3(GNb2(Ab4GNb6)Ma6)Mb4GNb4(Fa6)GN;Asn
1024	GNb2(Ab4GNb4)Ma3(GNb2(Fa3(Ab4)GNb6)Ma6)Mb4GNb4(Fa6)GN;Asn
1025	GNb2(Aa3Ab4GNb4)Ma3(GNb2(Ab4GNb6)Ma6)Mb4GNb4(Fa6)GN;Asn
1026	GNb2(Ab4GNb4)Ma3(GNb2(Aa3Ab4GNb6)Ma6)Mb4GNb4(Fa6)GN;Asn
1027	GNb2(Fa3(NNa3Ab4)GNb4)Ma3(GNb2(GNb6)Ma6)Mb4GNb4(Fa6)GN;Asn
1028	GNb2(GNb4)Ma3(Ab4GNb3Ab4GNb2(GNb6)Ma6)Mb4GNb4(Fa6)GN;Asn
1029	GNb2(GNb4)Ma3(GNb3Ab4GNb2(Ab4GNb6)Ma6)Mb4GNb4(Fa6)GN;Asn
1030	GNb2(GNb4)Ma3(Ab4GNb2(GNb3Ab4GNb6)Ma6)Mb4GNb4(Fa6)GN;Asn
1031	GNb2(GNb4)Ma3(NNa3Ab4GNb2(Ab4GNb6)Ma6)Mb4GNb4(Fa6)GN;Asn
1032	GNb2(GNb4)Ma3(Ab4GNb2(NNa3Ab4GNb6)Ma6)Mb4GNb4(Fa6)GN;Asn
1033	GNb2(GNb4)Ma3(Fa3(Ab4)GNb2(Ab4GNb6)Ma6)Mb4GNb4(Fa6)GN;Asn
1034	GNb2(GNb4)Ma3(Ab4GNb2(Fa3(Ab4)GNb6)Ma6)Mb4GNb4(Fa6)GN;Asn
1035	GNb2(GNb4)Ma3(Aa3Ab4GNb2(Ab4GNb6)Ma6)Mb4GNb4(Fa6)GN;Asn
1036	GNb2(GNb4)Ma3(Ab4GNb2(Aa3Ab4GNb6)Ma6)Mb4GNb4(Fa6)GN;Asn
1037	GNb2(GNb4)Ma3(GNb2(Ab4GNb3Ab4GNb6)Ma6)Mb4GNb4(Fa6)GN;Asn
1038	GNb2(GNb4)Ma3(GNb2(Fa3(NNa3Ab4)GNb6)Ma6)Mb4GNb4(Fa6)GN;Asn
1039	Ab4GNb3Ab4GNb2(Ab4GNb4)Ma3(GNb2Ma6)Mb4GNb4(Fa6)GN;Asn
1040	GNb3Ab4GNb2(Ab4GNb4)Ma3(Ab4GNb2Ma6)Mb4GNb4(Fa6)GN;Asn
1041	Ab4GNb2(Ab4GNb3Ab4GNb4)Ma3(GNb2Ma6)Mb4GNb4(Fa6)GN;Asn
1042	Ab4GNb2(GNb3Ab4GNb4)Ma3(Ab4GNb2Ma6)Mb4GNb4(Fa6)GN;Asn
1043	Ab4GNb2(Ab4GNb4)Ma3(GNb3Ab4GNb2Ma6)Mb4GNb4(Fa6)GN;Asn
1044	NNa3Ab4GNb2(Ab4GNb4)Ma3(Ab4GNb2Ma6)Mb4GNb4(Fa6)GN;Asn
1045	Ab4GNb2(NNa3Ab4GNb4)Ma3(Ab4GNb2Ma6)Mb4GNb4(Fa6)GN;Asn
1046	Ab4GNb2(Ab4GNb4)Ma3(NNa3Ab4GNb2Ma6)Mb4GNb4(Fa6)GN;Asn
1047	Fa3(Ab4)GNb2(Ab4GNb4)Ma3(Ab4GNb2Ma6)Mb4GNb4(Fa6)GN;Asn
1048	Ab4GNb2(Fa3(Ab4)GNb4)Ma3(Ab4GNb2Ma6)Mb4GNb4(Fa6)GN;Asn
1049	Ab4GNb2(Ab4GNb4)Ma3(Fa3(Ab4)GNb2Ma6)Mb4GNb4(Fa6)GN;Asn
1050	Aa3Ab4GNb2(Ab4GNb4)Ma3(Ab4GNb2Ma6)Mb4GNb4(Fa6)GN;Asn
1051	Ab4GNb2(Aa3Ab4GNb4)Ma3(Ab4GNb2Ma6)Mb4GNb4(Fa6)GN;Asn
1052	Ab4GNb2(Ab4GNb4)Ma3(Aa3Ab4GNb2Ma6)Mb4GNb4(Fa6)GN;Asn
1053	NNa3Ab4GNb2(NNa3Ab4GNb4)Ma3(GNb2Ma6)Mb4GNb4(Fa6)GN;Asn
1054	Fa3(NNa3Ab4)GNb2(Ab4GNb4)Ma3(GNb2Ma6)Mb4GNb4(Fa6)GN;Asn
1055	NNa3Ab4GNb2(Fa3(Ab4)GNb4)Ma3(GNb2Ma6)Mb4GNb4(Fa6)GN;Asn
1056	NNa3Ab4GNb2(Aa3Ab4GNb4)Ma3(GNb2Ma6)Mb4GNb4(Fa6)GN;Asn
1057	Fa3(Ab4)GNb2(NNa3Ab4GNb4)Ma3(GNb2Ma6)Mb4GNb4(Fa6)GN;Asn
1058	Ab4GNb2(Fa3(NNa3Ab4)GNb4)Ma3(GNb2Ma6)Mb4GNb4(Fa6)GN;Asn
1059	Aa3Ab4GNb2(NNa3Ab4GNb4)Ma3(GNb2Ma6)Mb4GNb4(Fa6)GN;Asn
1060	Fa3(Ab4)GNb2(Fa3(Ab4)GNb4)Ma3(GNb2Ma6)Mb4GNb4(Fa6)GN;Asn
1061	Fa3(Ab4)GNb2(Aa3Ab4GNb4)Ma3(GNb2Ma6)Mb4GNb4(Fa6)GN;Asn
1062	Aa3Ab4GNb2(Fa3(Ab4)GNb4)Ma3(GNb2Ma6)Mb4GNb4(Fa6)GN;Asn
1063	NNa3Ab4GNb2(GNb4)Ma3(NNa3Ab4GNb2Ma6)Mb4GNb4(Fa6)GN;Asn
1064	Fa3(NNa3Ab4)GNb2(GNb4)Ma3(Ab4GNb2Ma6)Mb4GNb4(Fa6)GN;Asn
1065	NNa3Ab4GNb2(GNb4)Ma3(Fa3(Ab4)GNb2Ma6)Mb4GNb4(Fa6)GN;Asn
1066	Fa3(Ab4)GNb2(GNb4)Ma3(NNa3Ab4GNb2Ma6)Mb4GNb4(Fa6)GN;Asn
1067	Ab4GNb2(GNb4)Ma3(Fa3(NNa3Ab4)GNb2Ma6)Mb4GNb4(Fa6)GN;Asn
1068	GNb2(Ab4GNb4)Ma3(Ab4GNb3Ab4GNb2Ma6)Mb4GNb4(Fa6)GN;Asn
1069	GNb2(NNa3Ab4GNb4)Ma3(NNa3Ab4GNb2Ma6)Mb4GNb4(Fa6)GN;Asn
1070	GNb2(Fa3(NNa3Ab4)GNb4)Ma3(Ab4GNb2Ma6)Mb4GNb4(Fa6)GN;Asn
1071	GNb2(NNa3Ab4GNb4)Ma3(Fa3(Ab4)GNb2Ma6)Mb4GNb4(Fa6)GN;Asn
1072	GNb2(Fa3(Ab4)GNb4)Ma3(NNa3Ab4GNb2Ma6)Mb4GNb4(Fa6)GN;Asn
1073	GNb2(Ab4GNb4)Ma3(Fa3(NNa3Ab4)GNb2Ma6)Mb4GNb4(Fa6)GN;Asn
1074	Ab4GNb2Ma3(GNb4)(GNb3Ab4GNb2(GNb6)Ma6)Mb4GNb4(Fa6)GN;Asn
1075	Ab4GNb2Ma3(GNb4)(Ab4GNb2(Ab4GNb6)Ma6)Mb4GNb4(Fa6)GN;Asn
1076	NNa3Ab4GNb2Ma3(GNb4)(Ab4GNb2(GNb6)Ma6)Mb4GNb4(Fa6)GN;Asn
1077	Ab4GNb2Ma3(GNb4)(NNa3Ab4GNb2(GNb6)Ma6)Mb4GNb4(Fa6)GN;Asn
1078	Fa3(Ab4)GNb2Ma3(GNb4)(Ab4GNb2(GNb6)Ma6)Mb4GNb4(Fa6)GN;Asn
1079	Ab4GNb2Ma3(GNb4)(Fa3(Ab4)GNb2(GNb6)Ma6)Mb4GNb4(Fa6)GN;Asn
1080	Aa3Ab4GNb2Ma3(GNb4)(Ab4GNb2(GNb6)Ma6)Mb4GNb4(Fa6)GN;Asn
1081	Ab4GNb2Ma3(GNb4)(Aa3Ab4GNb2(GNb6)Ma6)Mb4GNb4(Fa6)GN;Asn
1082	Ab4GNb2Ma3(GNb4)(GNb2(GNb3Ab4GNb6)Ma6)Mb4GNb4(Fa6)GN;Asn
1083	NNa3Ab4GNb2Ma3(GNb4)(GNb2(Ab4GNb6)Ma6)Mb4GNb4(Fa6)GN;Asn
1084	Ab4GNb2Ma3(GNb4)(GNb2(NNa3Ab4GNb6)Ma6)Mb4GNb4(Fa6)GN;Asn
1085	Fa3(Ab4)GNb2Ma3(GNb4)(GNb2(Ab4GNb6)Ma6)Mb4GNb4(Fa6)GN;Asn
1086	Ab4GNb2Ma3(GNb4)(GNb2(Fa3(Ab4)GNb6)Ma6)Mb4GNb4(Fa6)GN;Asn
1087	Aa3Ab4GNb2Ma3(GNb4)(GNb2(Ab4GNb6)Ma6)Mb4GNb4(Fa6)GN;Asn
1088	Ab4GNb2Ma3(GNb4)(GNb2(Aa3Ab4GNb6)Ma6)Mb4GNb4(Fa6)GN;Asn
1089	GNb2Ma3(GNb4)(GNb3Ab4GNb2(Ab4GNb6)Ma6)Mb4GNb4(Fa6)GN;Asn
1090	GNb2Ma3(GNb4)(Ab4GNb2(GNb3Ab4GNb6)Ma6)Mb4GNb4(Fa6)GN;Asn
1091	GNb2Ma3(GNb4)(NNa3Ab4GNb2(Ab4GNb6)Ma6)Mb4GNb4(Fa6)GN;Asn
1092	GNb2Ma3(GNb4)(Ab4GNb2(NNa3Ab4GNb6)Ma6)Mb4GNb4(Fa6)GN;Asn
1093	GNb2Ma3(GNb4)(Fa3(Ab4)GNb2(Ab4GNb6)Ma6)Mb4GNb4(Fa6)GN;Asn
1094	GNb2Ma3(GNb4)(Ab4GNb2(Fa3(Ab4)GNb6)Ma6)Mb4GNb4(Fa6)GN;Asn
1095	GNb2Ma3(GNb4)(Aa3Ab4GNb2(Ab4GNb6)Ma6)Mb4GNb4(Fa6)GN;Asn
1096	GNb2Ma3(GNb4)(Ab4GNb2(Aa3Ab4GNb6)Ma6)Mb4GNb4(Fa6)GN;Asn
1097	GNb2Ma3(GNb4)(GNb2(Ab4GNb3Ab4GNb6)Ma6)Mb4GNb4(Fa6)GN;Asn
1098	Ab4GNb3Ab4GNb2Ma3(Ab4GNb2(GNb6)Ma6)Mb4GNb4(Fa6)GN;Asn
1099	Ab4GNb3Ab4GNb2Ma3(GNb2(Ab4GNb6)Ma6)Mb4GNb4(Fa6)GN;Asn
1100	NNa3Ab4GNb3Ab4GNb2Ma3(GNb2(GNb6)Ma6)Mb4GNb4(Fa6)GN;Asn
1101	GNb3Ab4GNb2Ma3(Ab4GNb2(Ab4GNb6)Ma6)Mb4GNb4(Fa6)GN;Asn
1102	GNb3Ab4GNb2Ma3(GNb2(NNa3Ab4GNb6)Ma6)Mb4GNb4(Fa6)GN;Asn
1103	Fa3(GNb3Ab4)GNb2Ma3(GNb2(Ab4GNb6)Ma6)Mb4GNb4(Fa6)GN;Asn
1104	GNb3Ab4GNb2Ma3(GNb2(Fa3(Ab4)GNb6)Ma6)Mb4GNb4(Fa6)GN;Asn
1105	Ab4GNb2Ma3(Ab4GNb3Ab4GNb2(GNb6)Ma6)Mb4GNb4(Fa6)GN;Asn
1106	Ab4GNb2Ma3(GNb3Ab4GNb2(Ab4GNb6)Ma6)Mb4GNb4(Fa6)GN;Asn
1107	NNa3Ab4GNb2Ma3(GNb3Ab4GNb2(GNb6)Ma6)Mb4GNb4(Fa6)GN;Asn
1108	Fa3(Ab4)GNb2Ma3(GNb3Ab4GNb2(GNb6)Ma6)Mb4GNb4(Fa6)GN;Asn
1109	Ab4GNb2Ma3(Fa3(GNb3Ab4)GNb2(GNb6)Ma6)Mb4GNb4(Fa6)GN;Asn
1110	Aa3Ab4GNb2Ma3(GNb3Ab4GNb2(GNb6)Ma6)Mb4GNb4(Fa6)GN;Asn
1111	Ab4GNb2Ma3(Ab4GNb2(GNb3Ab4GNb6)Ma6)Mb4GNb4(Fa6)GN;Asn
1112	NNa3Ab4GNb2Ma3(Ab4GNb2(Ab4GNb6)Ma6)Mb4GNb4(Fa6)GN;Asn
1113	Ab4GNb2Ma3(NNa3Ab4GNb2(Ab4GNb6)Ma6)Mb4GNb4(Fa6)GN;Asn
1114	Ab4GNb2Ma3(Ab4GNb2(NNa3Ab4GNb6)Ma6)Mb4GNb4(Fa6)GN;Asn
1115	Fa3(Ab4)GNb2Ma3(Ab4GNb2(Ab4GNb6)Ma6)Mb4GNb4(Fa6)GN;Asn
1116	Ab4GNb2Ma3(Fa3(Ab4)GNb2(Ab4GNb6)Ma6)Mb4GNb4(Fa6)GN;Asn
1117	Ab4GNb2Ma3(Ab4GNb2(Fa3(Ab4)GNb6)Ma6)Mb4GNb4(Fa6)GN;Asn
1118	Aa3Ab4GNb2Ma3(Ab4GNb2(Ab4GNb6)Ma6)Mb4GNb4(Fa6)GN;Asn
1119	Ab4GNb2Ma3(Aa3Ab4GNb2(Ab4GNb6)Ma6)Mb4GNb4(Fa6)GN;Asn
1120	Ab4GNb2Ma3(Ab4GNb2(Aa3Ab4GNb6)Ma6)Mb4GNb4(Fa6)GN;Asn
1121	NNa3Ab4GNb2Ma3(NNa3Ab4GNb2(GNb6)Ma6)Mb4GNb4(Fa6)GN;Asn
1122	Fa3(NNa3Ab4)GNb2Ma3(Ab4GNb2(GNb6)Ma6)Mb4GNb4(Fa6)GN;Asn
1123	NNa3Ab4GNb2Ma3(Fa3(Ab4)GNb2(GNb6)Ma6)Mb4GNb4(Fa6)GN;Asn
1124	NNa3Ab4GNb2Ma3(Aa3Ab4GNb2(GNb6)Ma6)Mb4GNb4(Fa6)GN;Asn
1125	Fa3(Ab4)GNb2Ma3(NNa3Ab4GNb2(GNb6)Ma6)Mb4GNb4(Fa6)GN;Asn
1126	Ab4GNb2Ma3(Fa3(NNa3Ab4)GNb2(GNb6)Ma6)Mb4GNb4(Fa6)GN;Asn
1127	Aa3Ab4GNb2Ma3(NNa3Ab4GNb2(GNb6)Ma6)Mb4GNb4(Fa6)GN;Asn
1128	Fa3(Ab4)GNb2Ma3(Fa3(Ab4)GNb2(GNb6)Ma6)Mb4GNb4(Fa6)GN;Asn
1129	Fa3(Ab4)GNb2Ma3(Aa3Ab4GNb2(GNb6)Ma6)Mb4GNb4(Fa6)GN;Asn
1130	Aa3Ab4GNb2Ma3(Fa3(Ab4)GNb2(GNb6)Ma6)Mb4GNb4(Fa6)GN;Asn
1131	Fa3(Aa3Ab4)GNb2Ma3(Ab4GNb2(GNb6)Ma6)Mb4GNb4(Fa6)GN;Asn
1132	Aa3Ab4GNb2Ma3(Aa3Ab4GNb2(GNb6)Ma6)Mb4GNb4(Fa6)GN;Asn
1133	Ab4GNb2Ma3(Fa3(Aa3Ab4)GNb2(GNb6)Ma6)Mb4GNb4(Fa6)GN;Asn
1134	Ab4GNb2Ma3(GNb2(Ab4GNb3Ab4GNb6)Ma6)Mb4GNb4(Fa6)GN;Asn
1135	NNa3Ab4GNb2Ma3(GNb2(GNb3Ab4GNb6)Ma6)Mb4GNb4(Fa6)GN;Asn
1136	Fa3(Ab4)GNb2Ma3(GNb2(GNb3Ab4GNb6)Ma6)Mb4GNb4(Fa6)GN;Asn
1137	Ab4GNb2Ma3(GNb2(Fa3(GNb3Ab4)GNb6)Ma6)Mb4GNb4(Fa6)GN;Asn
1138	Aa3Ab4GNb2Ma3(GNb2(GNb3Ab4GNb6)Ma6)Mb4GNb4(Fa6)GN;Asn
1139	NNa3Ab4GNb2Ma3(GNb2(NNa3Ab4GNb6)Ma6)Mb4GNb4(Fa6)GN;Asn
1140	Fa3(NNa3Ab4)GNb2Ma3(GNb2(Ab4GNb6)Ma6)Mb4GNb4(Fa6)GN;Asn
1141	NNa3Ab4GNb2Ma3(GNb2(Fa3(Ab4)GNb6)Ma6)Mb4GNb4(Fa6)GN;Asn
1142	NNa3Ab4GNb2Ma3(GNb2(Aa3Ab4GNb6)Ma6)Mb4GNb4(Fa6)GN;Asn
1143	Fa3(Ab4)GNb2Ma3(GNb2(NNa3Ab4GNb6)Ma6)Mb4GNb4(Fa6)GN;Asn
1144	Ab4GNb2Ma3(GNb2(Fa3(NNa3Ab4)GNb6)Ma6)Mb4GNb4(Fa6)GN;Asn
1145	Aa3Ab4GNb2Ma3(GNb2(NNa3Ab4GNb6)Ma6)Mb4GNb4(Fa6)GN;Asn
1146	Fa3(Ab4)GNb2Ma3(GNb2(Fa3(Ab4)GNb6)Ma6)Mb4GNb4(Fa6)GN;Asn
1147	Fa3(Ab4)GNb2Ma3(GNb2(Aa3Ab4GNb6)Ma6)Mb4GNb4(Fa6)GN;Asn
1148	Aa3Ab4GNb2Ma3(GNb2(Fa3(Ab4)GNb6)Ma6)Mb4GNb4(Fa6)GN;Asn
1149	Fa3(Aa3Ab4)GNb2Ma3(GNb2(Ab4GNb6)Ma6)Mb4GNb4(Fa6)GN;Asn
1150	Aa3Ab4GNb2Ma3(GNb2(Aa3Ab4GNb6)Ma6)Mb4GNb4(Fa6)GN;Asn
1151	Ab4GNb2Ma3(GNb2(Fa3(Aa3Ab4)GNb6)Ma6)Mb4GNb4(Fa6)GN;Asn
1152	GNb2Ma3(Ab4GNb3Ab4GNb2(Ab4GNb6)Ma6)Mb4GNb4(Fa6)GN;Asn
1153	GNb2Ma3(GNb3Ab4GNb2(NNa3Ab4GNb6)Ma6)Mb4GNb4(Fa6)GN;Asn
1154	GNb2Ma3(Fa3(GNb3Ab4)GNb2(Ab4GNb6)Ma6)Mb4GNb4(Fa6)GN;Asn
1155	GNb2Ma3(GNb3Ab4GNb2(Fa3(Ab4)GNb6)Ma6)Mb4GNb4(Fa6)GN;Asn
1156	GNb2Ma3(GNb3Ab4GNb2(Aa3Ab4GNb6)Ma6)Mb4GNb4(Fa6)GN;Asn
1157	GNb2Ma3(Ab4GNb2(Ab4GNb3Ab4GNb6)Ma6)Mb4GNb4(Fa6)GN;Asn
1158	GNb2Ma3(NNa3Ab4GNb2(GNb3Ab4GNb6)Ma6)Mb4GNb4(Fa6)GN;Asn
1159	GNb2Ma3(Fa3(Ab4)GNb2(GNb3Ab4GNb6)Ma6)Mb4GNb4(Fa6)GN;Asn
1160	GNb2Ma3(Ab4GNb2(Fa3(GNb3Ab4)GNb6)Ma6)Mb4GNb4(Fa6)GN;Asn
1161	GNb2Ma3(Aa3Ab4GNb2(GNb3Ab4GNb6)Ma6)Mb4GNb4(Fa6)GN;Asn
1162	GNb2Ma3(NNa3Ab4GNb2(NNa3Ab4GNb6)Ma6)Mb4GNb4(Fa6)GN;Asn
1163	GNb2Ma3(Fa3(NNa3Ab4)GNb2(Ab4GNb6)Ma6)Mb4GNb4(Fa6)GN;Asn
1164	GNb2Ma3(NNa3Ab4GNb2(Fa3(Ab4)GNb6)Ma6)Mb4GNb4(Fa6)GN;Asn
1165	GNb2Ma3(NNa3Ab4GNb2(Aa3Ab4GNb6)Ma6)Mb4GNb4(Fa6)GN;Asn
1166	GNb2Ma3(Fa3(Ab4)GNb2(NNa3Ab4GNb6)Ma6)Mb4GNb4(Fa6)GN;Asn
1167	GNb2Ma3(Ab4GNb2(Fa3(NNa3Ab4)GNb6)Ma6)Mb4GNb4(Fa6)GN;Asn
1168	GNb2Ma3(Aa3Ab4GNb2(NNa3Ab4GNb6)Ma6)Mb4GNb4(Fa6)GN;Asn
1169	GNb2Ma3(Fa3(Ab4)GNb2(Fa3(Ab4)GNb6)Ma6)Mb4GNb4(Fa6)GN;Asn
1170	GNb2Ma3(Fa3(Ab4)GNb2(Aa3Ab4GNb6)Ma6)Mb4GNb4(Fa6)GN;Asn
1171	GNb2Ma3(Aa3Ab4GNb2(Fa3(Ab4)GNb6)Ma6)Mb4GNb4(Fa6)GN;Asn
1172	GNb2Ma3(Fa3(Aa3Ab4)GNb2(Ab4GNb6)Ma6)Mb4GNb4(Fa6)GN;Asn
1173	GNb2Ma3(Aa3Ab4GNb2(Aa3Ab4GNb6)Ma6)Mb4GNb4(Fa6)GN;Asn
1174	GNb2Ma3(Ab4GNb2(Fa3(Aa3Ab4)GNb6)Ma6)Mb4GNb4(Fa6)GN;Asn
1175	GNb2Ma3(GNb2(GNb3Ab4GNb3Ab4GNb6)Ma6)Mb4GNb4(Fa6)GN;Asn
1176	GNb2Ma3(GNb2(NNa3Ab4GNb3Ab4GNb6)Ma6)Mb4GNb4(Fa6)GN;Asn
1177	GNb2Ma3(GNb2(Fa3(Ab4)GNb3Ab4GNb6)Ma6)Mb4GNb4(Fa6)GN;Asn
1178	GNb2Ma3(GNb2(Fa3(Ab4GNb3Ab4)GNb6)Ma6)Mb4GNb4(Fa6)GN;Asn
1179	GNb2Ma3(GNb2(Aa3Ab4GNb3Ab4GNb6)Ma6)Mb4GNb4(Fa6)GN;Asn
1180	NNa3Ab4GNb3Ab4GNb2Ma3(Ab4GNb2Ma6)Mb4GNb4(Fa6)GN;Asn
1181	Ab4GNb3Ab4GNb2Ma3(NNa3Ab4GNb2Ma6)Mb4GNb4(Fa6)GN;Asn
1182	Fa3(Ab4)GNb3Ab4GNb2Ma3(Ab4GNb2Ma6)Mb4GNb4(Fa6)GN;Asn
1183	Fa3(Ab4GNb3Ab4)GNb2Ma3(Ab4GNb2Ma6)Mb4GNb4(Fa6)GN;Asn
1184	Ab4GNb3Ab4GNb2Ma3(Fa3(Ab4)GNb2Ma6)Mb4GNb4(Fa6)GN;Asn
1185	NNa3Ab4GNb2Ma3(Ab4GNb3Ab4GNb2Ma6)Mb4GNb4(Fa6)GN;Asn
1186	Ab4GNb2Ma3(NNa3Ab4GNb3Ab4GNb2Ma6)Mb4GNb4(Fa6)GN;Asn
1187	Fa3(Ab4)GNb2Ma3(Ab4GNb3Ab4GNb2Ma6)Mb4GNb4(Fa6)GN;Asn
1188	Ab4GNb2Ma3(Fa3(Ab4)GNb3Ab4GNb2Ma6)Mb4GNb4(Fa6)GN;Asn
1189	Ab4GNb2Ma3(Fa3(Ab4GNb3Ab4)GNb2Ma6)Mb4GNb4(Fa6)GN;Asn
1190	Fa3(NNa3Ab4)GNb2Ma3(NNa3Ab4GNb2Ma6)Mb4GNb4(Fa6)GN;Asn
1191	NNa3Ab4GNb2Ma3(Fa3(NNa3Ab4)GNb2Ma6)Mb4GNb4(Fa6)GN;Asn
1192	Fa3(NNa3Ab4)GNb2Ma3(Fa3(Ab4)GNb2Ma6)Mb4GNb4(Fa6)GN;Asn
1193	Fa3(Ab4)GNb2Ma3(Fa3(NNa3Ab4)GNb2Ma6)Mb4GNb4(Fa6)GN;Asn
1194	Fa3(Ab4)GNb2Ma3(Fa3(Aa3Ab4)GNb2Ma6)Mb4GNb4(Fa6)GN;Asn
1195	Fa3(Aa3Ab4)GNb2Ma3(Fa3(Ab4)GNb2Ma6)Mb4GNb4(Fa6)GN;Asn
1196	Fa3(NNa3Ab4)GNb2Ma3(GNb4)(Fa3(Ab4)GNb2Ma6)Mb4GNb4GN;Asn
1197	Fa3(Ab4)GNb2Ma3(GNb4)(Fa3(NNa3Ab4)GNb2Ma6)Mb4GNb4GN;Asn
1198	NNa3Ab4GNb2(Ab4GNb4)Ma3(GNb4)(Ab4GNb2Ma6)Mb4GNb4GN;Asn
1199	Ab4GNb2(NNa3Ab4GNb4)Ma3(GNb4)(Ab4GNb2Ma6)Mb4GNb4GN;Asn
1200	Ab4GNb2(Ab4GNb4)Ma3(GNb4)(NNa3Ab4GNb2Ma6)Mb4GNb4GN;Asn
1201	Ab4GNb2(Ab4GNb4)Ma3(GNb4)(Ab4GNb2(GNb6)Ma6)Mb4GNb4GN;Asn
1202	Ab4GNb2(Ab4GNb4)Ma3(GNb4)(GNb2(Ab4GNb6)Ma6)Mb4GNb4GN;Asn
1203	NNa3Ab4GNb2(Ab4GNb4)Ma3(GNb4)(GNb2(GNb6)Ma6)Mb4GNb4GN;Asn
1204	Ab4GNb2(NNa3Ab4GNb4)Ma3(GNb4)(GNb2(GNb6)Ma6)Mb4GNb4GN;Asn
1205	Fa3(Ab4)GNb2(Ab4GNb4)Ma3(GNb4)(GNb2(GNb6)Ma6)Mb4GNb4GN;Asn
1206	Ab4GNb2(Fa3(Ab4)GNb4)Ma3(GNb4)(GNb2(GNb6)Ma6)Mb4GNb4GN;Asn
1207	Ab4GNb2(GNb4)Ma3(GNb4)(Ab4GNb2(Ab4GNb6)Ma6)Mb4GNb4GN;Asn
1208	NNa3Ab4GNb2(GNb4)Ma3(GNb4)(Ab4GNb2(GNb6)Ma6)Mb4GNb4GN;Asn
1209	NNa3Ab4GNb2(GNb4)Ma3(GNb4)(GNb2(Ab4GNb6)Ma6)Mb4GNb4GN;Asn
1210	Ab4GNb2(GNb4)Ma3(GNb4)(GNb2(NNa3Ab4GNb6)Ma6)Mb4GNb4GN;Asn
1211	Fa3(Ab4)GNb2(GNb4)Ma3(GNb4)(GNb2(Ab4GNb6)Ma6)Mb4GNb4GN;Asn
1212	Ab4GNb2(GNb4)Ma3(GNb4)(GNb2(Fa3(Ab4)GNb6)Ma6)Mb4GNb4GN;Asn
1213	GNb2(Ab4GNb4)Ma3(GNb4)(Ab4GNb2(Ab4GNb6)Ma6)Mb4GNb4GN;Asn
1214	GNb2(NNa3Ab4GNb4)Ma3(GNb4)(Ab4GNb2(GNb6)Ma6)Mb4GNb4GN;Asn
1215	GNb2(Ab4GNb4)Ma3(GNb4)(NNa3Ab4GNb2(GNb6)Ma6)Mb4GNb4GN;Asn
1216	GNb2(NNa3Ab4GNb4)Ma3(GNb4)(GNb2(Ab4GNb6)Ma6)Mb4GNb4GN;Asn
1217	GNb2(Ab4GNb4)Ma3(GNb4)(GNb2(NNa3Ab4GNb6)Ma6)Mb4GNb4GN;Asn
1218	GNb2(Fa3(Ab4)GNb4)Ma3(GNb4)(GNb2(Ab4GNb6)Ma6)Mb4GNb4GN;Asn
1219	GNb2(Ab4GNb4)Ma3(GNb4)(GNb2(Fa3(Ab4)GNb6)Ma6)Mb4GNb4GN;Asn
1220	GNb2(GNb4)Ma3(GNb4)(Ab4GNb2(NNa3Ab4GNb6)Ma6)Mb4GNb4GN;Asn
1221	Ab4GNb3Ab4GNb2(Ab4GNb4)Ma3(GNb2(GNb6)Ma6)Mb4GNb4GN;Asn
1222	GNb3Ab4GNb2(Ab4GNb4)Ma3(Ab4GNb2(GNb6)Ma6)Mb4GNb4GN;Asn
1223	GNb3Ab4GNb2(Ab4GNb4)Ma3(GNb2(Ab4GNb6)Ma6)Mb4GNb4GN;Asn
1224	GNb3Ab4GNb2(NNa3Ab4GNb4)Ma3(GNb2(GNb6)Ma6)Mb4GNb4GN;Asn
1225	Ab4GNb2(Ab4GNb3Ab4GNb4)Ma3(GNb2(GNb6)Ma6)Mb4GNb4GN;Asn
1226	Ab4GNb2(GNb3Ab4GNb4)Ma3(Ab4GNb2(GNb6)Ma6)Mb4GNb4GN;Asn
1227	Ab4GNb2(GNb3Ab4GNb4)Ma3(GNb2(Ab4GNb6)Ma6)Mb4GNb4GN;Asn
1228	NNa3Ab4GNb2(GNb3Ab4GNb4)Ma3(GNb2(GNb6)Ma6)Mb4GNb4GN;Asn
1229	Ab4GNb2(Ab4GNb4)Ma3(GNb3Ab4GNb2(GNb6)Ma6)Mb4GNb4GN;Asn
1230	Ab4GNb2(Ab4GNb4)Ma3(Ab4GNb2(Ab4GNb6)Ma6)Mb4GNb4GN;Asn
1231	NNa3Ab4GNb2(Ab4GNb4)Ma3(Ab4GNb2(GNb6)Ma6)Mb4GNb4GN;Asn
1232	Ab4GNb2(NNa3Ab4GNb4)Ma3(Ab4GNb2(GNb6)Ma6)Mb4GNb4GN;Asn
1233	Ab4GNb2(Ab4GNb4)Ma3(NNa3Ab4GNb2(GNb6)Ma6)Mb4GNb4GN;Asn
1234	Fa3(Ab4)GNb2(Ab4GNb4)Ma3(Ab4GNb2(GNb6)Ma6)Mb4GNb4GN;Asn
1235	Ab4GNb2(Fa3(Ab4)GNb4)Ma3(Ab4GNb2(GNb6)Ma6)Mb4GNb4GN;Asn
1236	Ab4GNb2(Ab4GNb4)Ma3(Fa3(Ab4)GNb2(GNb6)Ma6)Mb4GNb4GN;Asn
1237	Aa3Ab4GNb2(Ab4GNb4)Ma3(Ab4GNb2(GNb6)Ma6)Mb4GNb4GN;Asn
1238	Ab4GNb2(Aa3Ab4GNb4)Ma3(Ab4GNb2(GNb6)Ma6)Mb4GNb4GN;Asn
1239	Ab4GNb2(Ab4GNb4)Ma3(Aa3Ab4GNb2(GNb6)Ma6)Mb4GNb4GN;Asn
1240	Ab4GNb2(Ab4GNb4)Ma3(GNb2(GNb3Ab4GNb6)Ma6)Mb4GNb4GN;Asn
1241	NNa3Ab4GNb2(Ab4GNb4)Ma3(GNb2(Ab4GNb6)Ma6)Mb4GNb4GN;Asn
1242	Ab4GNb2(NNa3Ab4GNb4)Ma3(GNb2(Ab4GNb6)Ma6)Mb4GNb4GN;Asn
1243	Ab4GNb2(Ab4GNb4)Ma3(GNb2(NNa3Ab4GNb6)Ma6)Mb4GNb4GN;Asn
1244	Fa3(Ab4)GNb2(Ab4GNb4)Ma3(GNb2(Ab4GNb6)Ma6)Mb4GNb4GN;Asn
1245	Ab4GNb2(Fa3(Ab4)GNb4)Ma3(GNb2(Ab4GNb6)Ma6)Mb4GNb4GN;Asn
1246	Ab4GNb2(Ab4GNb4)Ma3(GNb2(Fa3(Ab4)GNb6)Ma6)Mb4GNb4GN;Asn
1247	Aa3Ab4GNb2(Ab4GNb4)Ma3(GNb2(Ab4GNb6)Ma6)Mb4GNb4GN;Asn
1248	Ab4GNb2(Aa3Ab4GNb4)Ma3(GNb2(Ab4GNb6)Ma6)Mb4GNb4GN;Asn
1249	Ab4GNb2(Ab4GNb4)Ma3(GNb2(Aa3Ab4GNb6)Ma6)Mb4GNb4GN;Asn
1250	NNa3Ab4GNb2(NNa3Ab4GNb4)Ma3(GNb2(GNb6)Ma6)Mb4GNb4GN;Asn
1251	Fa3(NNa3Ab4)GNb2(Ab4GNb4)Ma3(GNb2(GNb6)Ma6)Mb4GNb4GN;Asn
1252	NNa3Ab4GNb2(Fa3(Ab4)GNb4)Ma3(GNb2(GNb6)Ma6)Mb4GNb4GN;Asn
1253	NNa3Ab4GNb2(Aa3Ab4GNb4)Ma3(GNb2(GNb6)Ma6)Mb4GNb4GN;Asn
1254	Fa3(Ab4)GNb2(NNa3Ab4GNb4)Ma3(GNb2(GNb6)Ma6)Mb4GNb4GN;Asn
1255	Ab4GNb2(Fa3(NNa3Ab4)GNb4)Ma3(GNb2(GNb6)Ma6)Mb4GNb4GN;Asn
1256	Aa3Ab4GNb2(NNa3Ab4GNb4)Ma3(GNb2(GNb6)Ma6)Mb4GNb4GN;Asn
1257	Fa3(Ab4)GNb2(Fa3(Ab4)GNb4)Ma3(GNb2(GNb6)Ma6)Mb4GNb4GN;Asn
1258	Fa3(Ab4)GNb2(Aa3Ab4GNb4)Ma3(GNb2(GNb6)Ma6)Mb4GNb4GN;Asn
1259	Aa3Ab4GNb2(Fa3(Ab4)GNb4)Ma3(GNb2(GNb6)Ma6)Mb4GNb4GN;Asn
1260	Fa3(Aa3Ab4)GNb2(Ab4GNb4)Ma3(GNb2(GNb6)Ma6)Mb4GNb4GN;Asn
1261	Ab4GNb2(Fa3(Aa3Ab4)GNb4)Ma3(GNb2(GNb6)Ma6)Mb4GNb4GN;Asn
1262	Ab4GNb2(GNb4)Ma3(Ab4GNb3Ab4GNb2(GNb6)Ma6)Mb4GNb4GN;Asn
1263	Ab4GNb2(GNb4)Ma3(GNb3Ab4GNb2(Ab4GNb6)Ma6)Mb4GNb4GN;Asn
1264	GNb3Ab4GNb2(GNb4)Ma3(Ab4GNb2(Ab4GNb6)Ma6)Mb4GNb4GN;Asn
1265	Ab4GNb2(GNb4)Ma3(Ab4GNb2(GNb3Ab4GNb6)Ma6)Mb4GNb4GN;Asn
1266	NNa3Ab4GNb2(GNb4)Ma3(Ab4GNb2(Ab4GNb6)Ma6)Mb4GNb4GN;Asn
1267	Ab4GNb2(GNb4)Ma3(NNa3Ab4GNb2(Ab4GNb6)Ma6)Mb4GNb4GN;Asn
1268	Ab4GNb2(GNb4)Ma3(Ab4GNb2(NNa3Ab4GNb6)Ma6)Mb4GNb4GN;Asn
1269	Fa3(Ab4)GNb2(GNb4)Ma3(Ab4GNb2(Ab4GNb6)Ma6)Mb4GNb4GN;Asn
1270	Ab4GNb2(GNb4)Ma3(Fa3(Ab4)GNb2(Ab4GNb6)Ma6)Mb4GNb4GN;Asn
1271	Ab4GNb2(GNb4)Ma3(Ab4GNb2(Fa3(Ab4)GNb6)Ma6)Mb4GNb4GN;Asn
1272	Aa3Ab4GNb2(GNb4)Ma3(Ab4GNb2(Ab4GNb6)Ma6)Mb4GNb4GN;Asn
1273	Ab4GNb2(GNb4)Ma3(Aa3Ab4GNb2(Ab4GNb6)Ma6)Mb4GNb4GN;Asn
1274	Ab4GNb2(GNb4)Ma3(Ab4GNb2(Aa3Ab4GNb6)Ma6)Mb4GNb4GN;Asn
1275	NNa3Ab4GNb2(GNb4)Ma3(NNa3Ab4GNb2(GNb6)Ma6)Mb4GNb4GN;Asn
1276	Fa3(NNa3Ab4)GNb2(GNb4)Ma3(Ab4GNb2(GNb6)Ma6)Mb4GNb4GN;Asn
1277	NNa3Ab4GNb2(GNb4)Ma3(Fa3(Ab4)GNb2(GNb6)Ma6)Mb4GNb4GN;Asn
1278	Fa3(Ab4)GNb2(GNb4)Ma3(NNa3Ab4GNb2(GNb6)Ma6)Mb4GNb4GN;Asn
1279	Ab4GNb2(GNb4)Ma3(Fa3(NNa3Ab4)GNb2(GNb6)Ma6)Mb4GNb4GN;Asn
1280	Ab4GNb3Ab4GNb2(GNb4)Ma3(GNb2(Ab4GNb6)Ma6)Mb4GNb4GN;Asn
1281	Ab4GNb2(GNb4)Ma3(GNb2(Ab4GNb3Ab4GNb6)Ma6)Mb4GNb4GN;Asn
1282	NNa3Ab4GNb2(GNb4)Ma3(GNb2(GNb3Ab4GNb6)Ma6)Mb4GNb4GN;Asn
1283	NNa3Ab4GNb2(GNb4)Ma3(GNb2(NNa3Ab4GNb6)Ma6)Mb4GNb4GN;Asn
1284	Fa3(NNa3Ab4)GNb2(GNb4)Ma3(GNb2(Ab4GNb6)Ma6)Mb4GNb4GN;Asn
1285	NNa3Ab4GNb2(GNb4)Ma3(GNb2(Fa3(Ab4)GNb6)Ma6)Mb4GNb4GN;Asn
1286	NNa3Ab4GNb2(GNb4)Ma3(GNb2(Aa3Ab4GNb6)Ma6)Mb4GNb4GN;Asn
1287	Fa3(Ab4)GNb2(GNb4)Ma3(GNb2(NNa3Ab4GNb6)Ma6)Mb4GNb4GN;Asn
1288	Ab4GNb2(GNb4)Ma3(GNb2(Fa3(NNa3Ab4)GNb6)Ma6)Mb4GNb4GN;Asn
1289	Aa3Ab4GNb2(GNb4)Ma3(GNb2(NNa3Ab4GNb6)Ma6)Mb4GNb4GN;Asn
1290	Fa3(Ab4)GNb2(GNb4)Ma3(GNb2(Fa3(Ab4)GNb6)Ma6)Mb4GNb4GN;Asn
1291	Fa3(Ab4)GNb2(GNb4)Ma3(GNb2(Aa3Ab4GNb6)Ma6)Mb4GNb4GN;Asn
1292	Aa3Ab4GNb2(GNb4)Ma3(GNb2(Fa3(Ab4)GNb6)Ma6)Mb4GNb4GN;Asn
1293	GNb2(Ab4GNb3Ab4GNb4)Ma3(Ab4GNb2(GNb6)Ma6)Mb4GNb4GN;Asn
1294	GNb2(Ab4GNb3Ab4GNb4)Ma3(GNb2(Ab4GNb6)Ma6)Mb4GNb4GN;Asn
1295	GNb2(GNb3Ab4GNb4)Ma3(Ab4GNb2(Ab4GNb6)Ma6)Mb4GNb4GN;Asn
1296	GNb2(Ab4GNb4)Ma3(Ab4GNb3Ab4GNb2(GNb6)Ma6)Mb4GNb4GN;Asn
1297	GNb2(Ab4GNb4)Ma3(GNb3Ab4GNb2(Ab4GNb6)Ma6)Mb4GNb4GN;Asn
1298	GNb2(NNa3Ab4GNb4)Ma3(GNb3Ab4GNb2(GNb6)Ma6)Mb4GNb4GN;Asn
1299	GNb2(Ab4GNb4)Ma3(Ab4GNb2(GNb3Ab4GNb6)Ma6)Mb4GNb4GN;Asn
1300	GNb2(NNa3Ab4GNb4)Ma3(Ab4GNb2(Ab4GNb6)Ma6)Mb4GNb4GN;Asn
1301	GNb2(Ab4GNb4)Ma3(NNa3Ab4GNb2(Ab4GNb6)Ma6)Mb4GNb4GN;Asn
1302	GNb2(Ab4GNb4)Ma3(Ab4GNb2(NNa3Ab4GNb6)Ma6)Mb4GNb4GN;Asn
1303	GNb2(Fa3(Ab4)GNb4)Ma3(Ab4GNb2(Ab4GNb6)Ma6)Mb4GNb4GN;Asn
1304	GNb2(Ab4GNb4)Ma3(Fa3(Ab4)GNb2(Ab4GNb6)Ma6)Mb4GNb4GN;Asn
1305	GNb2(Ab4GNb4)Ma3(Ab4GNb2(Fa3(Ab4)GNb6)Ma6)Mb4GNb4GN;Asn
1306	GNb2(Aa3Ab4GNb4)Ma3(Ab4GNb2(Ab4GNb6)Ma6)Mb4GNb4GN;Asn
1307	GNb2(Ab4GNb4)Ma3(Aa3Ab4GNb2(Ab4GNb6)Ma6)Mb4GNb4GN;Asn
1308	GNb2(Ab4GNb4)Ma3(Ab4GNb2(Aa3Ab4GNb6)Ma6)Mb4GNb4GN;Asn
1309	GNb2(NNa3Ab4GNb4)Ma3(NNa3Ab4GNb2(GNb6)Ma6)Mb4GNb4GN;Asn
1310	GNb2(Fa3(NNa3Ab4)GNb4)Ma3(Ab4GNb2(GNb6)Ma6)Mb4GNb4GN;Asn
1311	GNb2(NNa3Ab4GNb4)Ma3(Fa3(Ab4)GNb2(GNb6)Ma6)Mb4GNb4GN;Asn
1312	GNb2(NNa3Ab4GNb4)Ma3(Aa3Ab4GNb2(GNb6)Ma6)Mb4GNb4GN;Asn
1313	GNb2(Fa3(Ab4)GNb4)Ma3(NNa3Ab4GNb2(GNb6)Ma6)Mb4GNb4GN;Asn
1314	GNb2(Ab4GNb4)Ma3(Fa3(NNa3Ab4)GNb2(GNb6)Ma6)Mb4GNb4GN;Asn
1315	GNb2(Aa3Ab4GNb4)Ma3(NNa3Ab4GNb2(GNb6)Ma6)Mb4GNb4GN;Asn
1316	GNb2(Fa3(Ab4)GNb4)Ma3(Fa3(Ab4)GNb2(GNb6)Ma6)Mb4GNb4GN;Asn
1317	GNb2(Ab4GNb4)Ma3(GNb2(Ab4GNb3Ab4GNb6)Ma6)Mb4GNb4GN;Asn
1318	GNb2(NNa3Ab4GNb4)Ma3(GNb2(GNb3Ab4GNb6)Ma6)Mb4GNb4GN;Asn
1319	GNb2(Fa3(Ab4)GNb4)Ma3(GNb2(GNb3Ab4GNb6)Ma6)Mb4GNb4GN;Asn
1320	GNb2(NNa3Ab4GNb4)Ma3(GNb2(NNa3Ab4GNb6)Ma6)Mb4GNb4GN;Asn
1321	GNb2(Fa3(NNa3Ab4)GNb4)Ma3(GNb2(Ab4GNb6)Ma6)Mb4GNb4GN;Asn
1322	GNb2(NNa3Ab4GNb4)Ma3(GNb2(Fa3(Ab4)GNb6)Ma6)Mb4GNb4GN;Asn
1323	GNb2(NNa3Ab4GNb4)Ma3(GNb2(Aa3Ab4GNb6)Ma6)Mb4GNb4GN;Asn
1324	GNb2(Fa3(Ab4)GNb4)Ma3(GNb2(NNa3Ab4GNb6)Ma6)Mb4GNb4GN;Asn
1325	GNb2(Ab4GNb4)Ma3(GNb2(Fa3(NNa3Ab4)GNb6)Ma6)Mb4GNb4GN;Asn
1326	GNb2(Aa3Ab4GNb4)Ma3(GNb2(NNa3Ab4GNb6)Ma6)Mb4GNb4GN;Asn
1327	GNb2(Fa3(Ab4)GNb4)Ma3(GNb2(Fa3(Ab4)GNb6)Ma6)Mb4GNb4GN;Asn
1328	GNb2(Fa3(Ab4)GNb4)Ma3(GNb2(Aa3Ab4GNb6)Ma6)Mb4GNb4GN;Asn
1329	GNb2(Aa3Ab4GNb4)Ma3(GNb2(Fa3(Ab4)GNb6)Ma6)Mb4GNb4GN;Asn
1330	GNb2(Fa3(Aa3Ab4)GNb4)Ma3(GNb2(Ab4GNb6)Ma6)Mb4GNb4GN;Asn
1331	GNb2(GNb4)Ma3(Ab4GNb3Ab4GNb2(Ab4GNb6)Ma6)Mb4GNb4GN;Asn
1332	GNb2(GNb4)Ma3(GNb3Ab4GNb2(NNa3Ab4GNb6)Ma6)Mb4GNb4GN;Asn
1333	GNb2(GNb4)Ma3(Ab4GNb2(Ab4GNb3Ab4GNb6)Ma6)Mb4GNb4GN;Asn
1334	GNb2(GNb4)Ma3(NNa3Ab4GNb2(GNb3Ab4GNb6)Ma6)Mb4GNb4GN;Asn
1335	GNb2(GNb4)Ma3(NNa3Ab4GNb2(NNa3Ab4GNb6)Ma6)Mb4GNb4GN;Asn
1336	GNb2(GNb4)Ma3(Fa3(NNa3Ab4)GNb2(Ab4GNb6)Ma6)Mb4GNb4GN;Asn
1337	GNb2(GNb4)Ma3(NNa3Ab4GNb2(Fa3(Ab4)GNb6)Ma6)Mb4GNb4GN;Asn
1338	GNb2(GNb4)Ma3(NNa3Ab4GNb2(Aa3Ab4GNb6)Ma6)Mb4GNb4GN;Asn
1339	GNb2(GNb4)Ma3(Fa3(Ab4)GNb2(NNa3Ab4GNb6)Ma6)Mb4GNb4GN;Asn
1340	GNb2(GNb4)Ma3(Ab4GNb2(Fa3(NNa3Ab4)GNb6)Ma6)Mb4GNb4GN;Asn
1341	GNb2(GNb4)Ma3(Aa3Ab4GNb2(NNa3Ab4GNb6)Ma6)Mb4GNb4GN;Asn
1342	GNb2(GNb4)Ma3(Fa3(Ab4)GNb2(Fa3(Ab4)GNb6)Ma6)Mb4GNb4GN;Asn
1343	GNb2(GNb4)Ma3(GNb2(NNa3Ab4GNb3Ab4GNb6)Ma6)Mb4GNb4GN;Asn
1344	Ab4GNb3Ab4GNb2(Ab4GNb4)Ma3(Ab4GNb2Ma6)Mb4GNb4GN;Asn
1345	GNb3Ab4GNb2(NNa3Ab4GNb4)Ma3(Ab4GNb2Ma6)Mb4GNb4GN;Asn
1346	Ab4GNb2(Ab4GNb3Ab4GNb4)Ma3(Ab4GNb2Ma6)Mb4GNb4GN;Asn
1347	NNa3Ab4GNb2(Ab4GNb3Ab4GNb4)Ma3(GNb2Ma6)Mb4GNb4GN;Asn
1348	Ab4GNb2(NNa3Ab4GNb3Ab4GNb4)Ma3(GNb2Ma6)Mb4GNb4GN;Asn
1349	NNa3Ab4GNb2(GNb3Ab4GNb4)Ma3(Ab4GNb2Ma6)Mb4GNb4GN;Asn
1350	Ab4GNb2(GNb3Ab4GNb4)Ma3(NNa3Ab4GNb2Ma6)Mb4GNb4GN;Asn
1351	Ab4GNb2(Ab4GNb4)Ma3(Ab4GNb3Ab4GNb2Ma6)Mb4GNb4GN;Asn
1352	NNa3Ab4GNb2(Ab4GNb4)Ma3(GNb3Ab4GNb2Ma6)Mb4GNb4GN;Asn
1353	Ab4GNb2(NNa3Ab4GNb4)Ma3(GNb3Ab4GNb2Ma6)Mb4GNb4GN;Asn
1354	NNa3Ab4GNb2(NNa3Ab4GNb4)Ma3(Ab4GNb2Ma6)Mb4GNb4GN;Asn
1355	NNa3Ab4GNb2(Ab4GNb4)Ma3(NNa3Ab4GNb2Ma6)Mb4GNb4GN;Asn
1356	Fa3(NNa3Ab4)GNb2(Ab4GNb4)Ma3(Ab4GNb2Ma6)Mb4GNb4GN;Asn
1357	NNa3Ab4GNb2(Fa3(Ab4)GNb4)Ma3(Ab4GNb2Ma6)Mb4GNb4GN;Asn
1358	NNa3Ab4GNb2(Ab4GNb4)Ma3(Fa3(Ab4)GNb2Ma6)Mb4GNb4GN;Asn
1359	NNa3Ab4GNb2(Aa3Ab4GNb4)Ma3(Ab4GNb2Ma6)Mb4GNb4GN;Asn
1360	NNa3Ab4GNb2(Ab4GNb4)Ma3(Aa3Ab4GNb2Ma6)Mb4GNb4GN;Asn
1361	Ab4GNb2(NNa3Ab4GNb4)Ma3(NNa3Ab4GNb2Ma6)Mb4GNb4GN;Asn
1362	Fa3(Ab4)GNb2(NNa3Ab4GNb4)Ma3(Ab4GNb2Ma6)Mb4GNb4GN;Asn
1363	Ab4GNb2(Fa3(NNa3Ab4)GNb4)Ma3(Ab4GNb2Ma6)Mb4GNb4GN;Asn
1364	Ab4GNb2(NNa3Ab4GNb4)Ma3(Fa3(Ab4)GNb2Ma6)Mb4GNb4GN;Asn
1365	Aa3Ab4GNb2(NNa3Ab4GNb4)Ma3(Ab4GNb2Ma6)Mb4GNb4GN;Asn
1366	Ab4GNb2(NNa3Ab4GNb4)Ma3(Aa3Ab4GNb2Ma6)Mb4GNb4GN;Asn
1367	Fa3(Ab4)GNb2(Ab4GNb4)Ma3(NNa3Ab4GNb2Ma6)Mb4GNb4GN;Asn
1368	Ab4GNb2(Fa3(Ab4)GNb4)Ma3(NNa3Ab4GNb2Ma6)Mb4GNb4GN;Asn
1369	Ab4GNb2(Ab4GNb4)Ma3(Fa3(NNa3Ab4)GNb2Ma6)Mb4GNb4GN;Asn
1370	Aa3Ab4GNb2(Ab4GNb4)Ma3(NNa3Ab4GNb2Ma6)Mb4GNb4GN;Asn
1371	Ab4GNb2(Aa3Ab4GNb4)Ma3(NNa3Ab4GNb2Ma6)Mb4GNb4GN;Asn
1372	Fa3(Ab4)GNb2(Fa3(Ab4)GNb4)Ma3(Ab4GNb2Ma6)Mb4GNb4GN;Asn
1373	Fa3(Ab4)GNb2(Ab4GNb4)Ma3(Fa3(Ab4)GNb2Ma6)Mb4GNb4GN;Asn
1374	Fa3(Ab4)GNb2(Aa3Ab4GNb4)Ma3(Ab4GNb2Ma6)Mb4GNb4GN;Asn
1375	Fa3(Ab4)GNb2(Ab4GNb4)Ma3(Aa3Ab4GNb2Ma6)Mb4GNb4GN;Asn
1376	Ab4GNb2(Fa3(Ab4)GNb4)Ma3(Fa3(Ab4)GNb2Ma6)Mb4GNb4GN;Asn
1377	Aa3Ab4GNb2(Fa3(Ab4)GNb4)Ma3(Ab4GNb2Ma6)Mb4GNb4GN;Asn
1378	Ab4GNb2(Fa3(Ab4)GNb4)Ma3(Aa3Ab4GNb2Ma6)Mb4GNb4GN;Asn
1379	Aa3Ab4GNb2(Ab4GNb4)Ma3(Fa3(Ab4)GNb2Ma6)Mb4GNb4GN;Asn
1380	Ab4GNb2(Aa3Ab4GNb4)Ma3(Fa3(Ab4)GNb2Ma6)Mb4GNb4GN;Asn
1381	Fa3(Aa3Ab4)GNb2(Ab4GNb4)Ma3(Ab4GNb2Ma6)Mb4GNb4GN;Asn
1382	Ab4GNb2(Fa3(Aa3Ab4)GNb4)Ma3(Ab4GNb2Ma6)Mb4GNb4GN;Asn
1383	Ab4GNb2(Aa3Ab4GNb4)Ma3(Aa3Ab4GNb2Ma6)Mb4GNb4GN;Asn
1384	Ab4GNb2(Ab4GNb4)Ma3(Fa3(Aa3Ab4)GNb2Ma6)Mb4GNb4GN;Asn
1385	Fa3(NNa3Ab4)GNb2(NNa3Ab4GNb4)Ma3(GNb2Ma6)Mb4GNb4GN;Asn
1386	NNa3Ab4GNb2(Fa3(NNa3Ab4)GNb4)Ma3(GNb2Ma6)Mb4GNb4GN;Asn
1387	Ab4GNb2Ma3(GNb4)(GNb3Ab4GNb2(Ab4GNb6)Ma6)Mb4GNb4GN;Asn
1388	Ab4GNb2Ma3(GNb4)(Ab4GNb2(GNb3Ab4GNb6)Ma6)Mb4GNb4GN;Asn
1389	NNa3Ab4GNb2Ma3(GNb4)(Ab4GNb2(Ab4GNb6)Ma6)Mb4GNb4GN;Asn
1390	Ab4GNb2Ma3(GNb4)(NNa3Ab4GNb2(Ab4GNb6)Ma6)Mb4GNb4GN;Asn
1391	Ab4GNb2Ma3(GNb4)(Ab4GNb2(NNa3Ab4GNb6)Ma6)Mb4GNb4GN;Asn
1392	Fa3(Ab4)GNb2Ma3(GNb4)(Ab4GNb2(Ab4GNb6)Ma6)Mb4GNb4GN;Asn
1393	Ab4GNb2Ma3(GNb4)(Fa3(Ab4)GNb2(Ab4GNb6)Ma6)Mb4GNb4GN;Asn
1394	Ab4GNb2Ma3(GNb4)(Ab4GNb2(Fa3(Ab4)GNb6)Ma6)Mb4GNb4GN;Asn
1395	Aa3Ab4GNb2Ma3(GNb4)(Ab4GNb2(Ab4GNb6)Ma6)Mb4GNb4GN;Asn
1396	Ab4GNb2Ma3(GNb4)(Aa3Ab4GNb2(Ab4GNb6)Ma6)Mb4GNb4GN;Asn
1397	Ab4GNb2Ma3(GNb4)(Ab4GNb2(Aa3Ab4GNb6)Ma6)Mb4GNb4GN;Asn
1398	NNa3Ab4GNb2Ma3(GNb4)(NNa3Ab4GNb2(GNb6)Ma6)Mb4GNb4GN;Asn
1399	Ab4GNb2Ma3(GNb4)(GNb2(Ab4GNb3Ab4GNb6)Ma6)Mb4GNb4GN;Asn
1400	NNa3Ab4GNb2Ma3(GNb4)(GNb2(GNb3Ab4GNb6)Ma6)Mb4GNb4GN;Asn
1401	NNa3Ab4GNb2Ma3(GNb4)(GNb2(NNa3Ab4GNb6)Ma6)Mb4GNb4GN;Asn
1402	Fa3(NNa3Ab4)GNb2Ma3(GNb4)(GNb2(Ab4GNb6)Ma6)Mb4GNb4GN;Asn
1403	NNa3Ab4GNb2Ma3(GNb4)(GNb2(Fa3(Ab4)GNb6)Ma6)Mb4GNb4GN;Asn
1404	NNa3Ab4GNb2Ma3(GNb4)(GNb2(Aa3Ab4GNb6)Ma6)Mb4GNb4GN;Asn
1405	Fa3(Ab4)GNb2Ma3(GNb4)(GNb2(NNa3Ab4GNb6)Ma6)Mb4GNb4GN;Asn
1406	Ab4GNb2Ma3(GNb4)(GNb2(Fa3(NNa3Ab4)GNb6)Ma6)Mb4GNb4GN;Asn
1407	Aa3Ab4GNb2Ma3(GNb4)(GNb2(NNa3Ab4GNb6)Ma6)Mb4GNb4GN;Asn
1408	Fa3(Ab4)GNb2Ma3(GNb4)(GNb2(Fa3(Ab4)GNb6)Ma6)Mb4GNb4GN;Asn
1409	GNb2Ma3(GNb4)(Ab4GNb3Ab4GNb2(Ab4GNb6)Ma6)Mb4GNb4GN;Asn
1410	GNb2Ma3(GNb4)(Ab4GNb2(Ab4GNb3Ab4GNb6)Ma6)Mb4GNb4GN;Asn
1411	GNb2Ma3(GNb4)(NNa3Ab4GNb2(NNa3Ab4GNb6)Ma6)Mb4GNb4GN;Asn
1412	GNb2Ma3(GNb4)(NNa3Ab4GNb2(Fa3(Ab4)GNb6)Ma6)Mb4GNb4GN;Asn
1413	GNb2Ma3(GNb4)(Fa3(Ab4)GNb2(NNa3Ab4GNb6)Ma6)Mb4GNb4GN;Asn
1414	GNb2Ma3(GNb4)(Ab4GNb2(Fa3(NNa3Ab4)GNb6)Ma6)Mb4GNb4GN;Asn
1415	Ab4GNb3Ab4GNb2Ma3(Ab4GNb2(Ab4GNb6)Ma6)Mb4GNb4GN;Asn
1416	NNa3Ab4GNb3Ab4GNb2Ma3(Ab4GNb2(GNb6)Ma6)Mb4GNb4GN;Asn
1417	Ab4GNb3Ab4GNb2Ma3(NNa3Ab4GNb2(GNb6)Ma6)Mb4GNb4GN;Asn
1418	Fa3(Ab4)GNb3Ab4GNb2Ma3(Ab4GNb2(GNb6)Ma6)Mb4GNb4GN;Asn
1419	Fa3(Ab4GNb3Ab4)GNb2Ma3(Ab4GNb2(GNb6)Ma6)Mb4GNb4GN;Asn
1420	Ab4GNb3Ab4GNb2Ma3(Fa3(Ab4)GNb2(GNb6)Ma6)Mb4GNb4GN;Asn
1421	Ab4GNb3Ab4GNb2Ma3(GNb2(GNb3Ab4GNb6)Ma6)Mb4GNb4GN;Asn
1422	NNa3Ab4GNb3Ab4GNb2Ma3(GNb2(Ab4GNb6)Ma6)Mb4GNb4GN;Asn
1423	Ab4GNb3Ab4GNb2Ma3(GNb2(NNa3Ab4GNb6)Ma6)Mb4GNb4GN;Asn
1424	Fa3(Ab4)GNb3Ab4GNb2Ma3(GNb2(Ab4GNb6)Ma6)Mb4GNb4GN;Asn
1425	Fa3(Ab4GNb3Ab4)GNb2Ma3(GNb2(Ab4GNb6)Ma6)Mb4GNb4GN;Asn
1426	Ab4GNb3Ab4GNb2Ma3(GNb2(Fa3(Ab4)GNb6)Ma6)Mb4GNb4GN;Asn
1427	Aa3Ab4GNb3Ab4GNb2Ma3(GNb2(Ab4GNb6)Ma6)Mb4GNb4GN;Asn
1428	Ab4GNb3Ab4GNb2Ma3(GNb2(Aa3Ab4GNb6)Ma6)Mb4GNb4GN;Asn
1429	GNb3Ab4GNb2Ma3(GNb3Ab4GNb2(Ab4GNb6)Ma6)Mb4GNb4GN;Asn
1430	GNb3Ab4GNb2Ma3(Ab4GNb2(GNb3Ab4GNb6)Ma6)Mb4GNb4GN;Asn
1431	GNb3Ab4GNb2Ma3(NNa3Ab4GNb2(Ab4GNb6)Ma6)Mb4GNb4GN;Asn
1432	GNb3Ab4GNb2Ma3(Ab4GNb2(NNa3Ab4GNb6)Ma6)Mb4GNb4GN;Asn
1433	Fa3(GNb3Ab4)GNb2Ma3(Ab4GNb2(Ab4GNb6)Ma6)Mb4GNb4GN;Asn
1434	GNb3Ab4GNb2Ma3(Fa3(Ab4)GNb2(Ab4GNb6)Ma6)Mb4GNb4GN;Asn
1435	GNb3Ab4GNb2Ma3(Ab4GNb2(Fa3(Ab4)GNb6)Ma6)Mb4GNb4GN;Asn
1436	GNb3Ab4GNb2Ma3(Aa3Ab4GNb2(Ab4GNb6)Ma6)Mb4GNb4GN;Asn
1437	GNb3Ab4GNb2Ma3(Ab4GNb2(Aa3Ab4GNb6)Ma6)Mb4GNb4GN;Asn
1438	Ab4GNb2Ma3(GNb3Ab4GNb3Ab4GNb2(GNb6)Ma6)Mb4GNb4GN;Asn
1439	Ab4GNb2Ma3(Ab4GNb3Ab4GNb2(Ab4GNb6)Ma6)Mb4GNb4GN;Asn
1440	NNa3Ab4GNb2Ma3(Ab4GNb3Ab4GNb2(GNb6)Ma6)Mb4GNb4GN;Asn
1441	Ab4GNb2Ma3(NNa3Ab4GNb3Ab4GNb2(GNb6)Ma6)Mb4GNb4GN;Asn
1442	Fa3(Ab4)GNb2Ma3(Ab4GNb3Ab4GNb2(GNb6)Ma6)Mb4GNb4GN;Asn
1443	Ab4GNb2Ma3(Fa3(Ab4)GNb3Ab4GNb2(GNb6)Ma6)Mb4GNb4GN;Asn
1444	Ab4GNb2Ma3(Fa3(Ab4GNb3Ab4)GNb2(GNb6)Ma6)Mb4GNb4GN;Asn
1445	Aa3Ab4GNb2Ma3(Ab4GNb3Ab4GNb2(GNb6)Ma6)Mb4GNb4GN;Asn
1446	Ab4GNb2Ma3(Aa3Ab4GNb3Ab4GNb2(GNb6)Ma6)Mb4GNb4GN;Asn
1447	Ab4GNb2Ma3(GNb3Ab4GNb2(GNb3Ab4GNb6)Ma6)Mb4GNb4GN;Asn
1448	NNa3Ab4GNb2Ma3(GNb3Ab4GNb2(Ab4GNb6)Ma6)Mb4GNb4GN;Asn
1449	Ab4GNb2Ma3(GNb3Ab4GNb2(NNa3Ab4GNb6)Ma6)Mb4GNb4GN;Asn
1450	Fa3(Ab4)GNb2Ma3(GNb3Ab4GNb2(Ab4GNb6)Ma6)Mb4GNb4GN;Asn
1451	Ab4GNb2Ma3(Fa3(GNb3Ab4)GNb2(Ab4GNb6)Ma6)Mb4GNb4GN;Asn
1452	Ab4GNb2Ma3(GNb3Ab4GNb2(Fa3(Ab4)GNb6)Ma6)Mb4GNb4GN;Asn
1453	Aa3Ab4GNb2Ma3(GNb3Ab4GNb2(Ab4GNb6)Ma6)Mb4GNb4GN;Asn
1454	Ab4GNb2Ma3(GNb3Ab4GNb2(Aa3Ab4GNb6)Ma6)Mb4GNb4GN;Asn
1455	Fa3(NNa3Ab4)GNb2Ma3(GNb3Ab4GNb2(GNb6)Ma6)Mb4GNb4GN;Asn
1456	Ab4GNb2Ma3(Ab4GNb2(Ab4GNb3Ab4GNb6)Ma6)Mb4GNb4GN;Asn
1457	NNa3Ab4GNb2Ma3(Ab4GNb2(GNb3Ab4GNb6)Ma6)Mb4GNb4GN;Asn
1458	Ab4GNb2Ma3(NNa3Ab4GNb2(GNb3Ab4GNb6)Ma6)Mb4GNb4GN;Asn
1459	Fa3(Ab4)GNb2Ma3(Ab4GNb2(GNb3Ab4GNb6)Ma6)Mb4GNb4GN;Asn
1460	Ab4GNb2Ma3(Fa3(Ab4)GNb2(GNb3Ab4GNb6)Ma6)Mb4GNb4GN;Asn
1461	Ab4GNb2Ma3(Ab4GNb2(Fa3(GNb3Ab4)GNb6)Ma6)Mb4GNb4GN;Asn
1462	Aa3Ab4GNb2Ma3(Ab4GNb2(GNb3Ab4GNb6)Ma6)Mb4GNb4GN;Asn
1463	Ab4GNb2Ma3(Aa3Ab4GNb2(GNb3Ab4GNb6)Ma6)Mb4GNb4GN;Asn
1464	NNa3Ab4GNb2Ma3(NNa3Ab4GNb2(Ab4GNb6)Ma6)Mb4GNb4GN;Asn
1465	NNa3Ab4GNb2Ma3(Ab4GNb2(NNa3Ab4GNb6)Ma6)Mb4GNb4GN;Asn
1466	Fa3(NNa3Ab4)GNb2Ma3(Ab4GNb2(Ab4GNb6)Ma6)Mb4GNb4GN;Asn
1467	NNa3Ab4GNb2Ma3(Fa3(Ab4)GNb2(Ab4GNb6)Ma6)Mb4GNb4GN;Asn
1468	NNa3Ab4GNb2Ma3(Ab4GNb2(Fa3(Ab4)GNb6)Ma6)Mb4GNb4GN;Asn
1469	NNa3Ab4GNb2Ma3(Aa3Ab4GNb2(Ab4GNb6)Ma6)Mb4GNb4GN;Asn
1470	NNa3Ab4GNb2Ma3(Ab4GNb2(Aa3Ab4GNb6)Ma6)Mb4GNb4GN;Asn
1471	Ab4GNb2Ma3(NNa3Ab4GNb2(NNa3Ab4GNb6)Ma6)Mb4GNb4GN;Asn
1472	Fa3(Ab4)GNb2Ma3(NNa3Ab4GNb2(Ab4GNb6)Ma6)Mb4GNb4GN;Asn
1473	Ab4GNb2Ma3(Fa3(NNa3Ab4)GNb2(Ab4GNb6)Ma6)Mb4GNb4GN;Asn
1474	Ab4GNb2Ma3(NNa3Ab4GNb2(Fa3(Ab4)GNb6)Ma6)Mb4GNb4GN;Asn
1475	Aa3Ab4GNb2Ma3(NNa3Ab4GNb2(Ab4GNb6)Ma6)Mb4GNb4GN;Asn
1476	Ab4GNb2Ma3(NNa3Ab4GNb2(Aa3Ab4GNb6)Ma6)Mb4GNb4GN;Asn
1477	Fa3(Ab4)GNb2Ma3(Ab4GNb2(NNa3Ab4GNb6)Ma6)Mb4GNb4GN;Asn
1478	Ab4GNb2Ma3(Fa3(Ab4)GNb2(NNa3Ab4GNb6)Ma6)Mb4GNb4GN;Asn
1479	Ab4GNb2Ma3(Ab4GNb2(Fa3(NNa3Ab4)GNb6)Ma6)Mb4GNb4GN;Asn
1480	Aa3Ab4GNb2Ma3(Ab4GNb2(NNa3Ab4GNb6)Ma6)Mb4GNb4GN;Asn
1481	Ab4GNb2Ma3(Aa3Ab4GNb2(NNa3Ab4GNb6)Ma6)Mb4GNb4GN;Asn
1482	Fa3(Ab4)GNb2Ma3(Fa3(Ab4)GNb2(Ab4GNb6)Ma6)Mb4GNb4GN;Asn
1483	Fa3(Ab4)GNb2Ma3(Ab4GNb2(Fa3(Ab4)GNb6)Ma6)Mb4GNb4GN;Asn
1484	Fa3(Ab4)GNb2Ma3(Aa3Ab4GNb2(Ab4GNb6)Ma6)Mb4GNb4GN;Asn
1485	Fa3(Ab4)GNb2Ma3(Ab4GNb2(Aa3Ab4GNb6)Ma6)Mb4GNb4GN;Asn
1486	Ab4GNb2Ma3(Fa3(Ab4)GNb2(Fa3(Ab4)GNb6)Ma6)Mb4GNb4GN;Asn
1487	Aa3Ab4GNb2Ma3(Fa3(Ab4)GNb2(Ab4GNb6)Ma6)Mb4GNb4GN;Asn
1488	Ab4GNb2Ma3(Fa3(Ab4)GNb2(Aa3Ab4GNb6)Ma6)Mb4GNb4GN;Asn
1489	Aa3Ab4GNb2Ma3(Ab4GNb2(Fa3(Ab4)GNb6)Ma6)Mb4GNb4GN;Asn
1490	Ab4GNb2Ma3(Aa3Ab4GNb2(Fa3(Ab4)GNb6)Ma6)Mb4GNb4GN;Asn
1491	Fa3(Aa3Ab4)GNb2Ma3(Ab4GNb2(Ab4GNb6)Ma6)Mb4GNb4GN;Asn
1492	Aa3Ab4GNb2Ma3(Aa3Ab4GNb2(Ab4GNb6)Ma6)Mb4GNb4GN;Asn
1493	Aa3Ab4GNb2Ma3(Ab4GNb2(Aa3Ab4GNb6)Ma6)Mb4GNb4GN;Asn
1494	Ab4GNb2Ma3(Fa3(Aa3Ab4)GNb2(Ab4GNb6)Ma6)Mb4GNb4GN;Asn
1495	Ab4GNb2Ma3(Aa3Ab4GNb2(Aa3Ab4GNb6)Ma6)Mb4GNb4GN;Asn
1496	Ab4GNb2Ma3(Ab4GNb2(Fa3(Aa3Ab4)GNb6)Ma6)Mb4GNb4GN;Asn
1497	Fa3(NNa3Ab4)GNb2Ma3(NNa3Ab4GNb2(GNb6)Ma6)Mb4GNb4GN;Asn
1498	NNa3Ab4GNb2Ma3(Fa3(NNa3Ab4)GNb2(GNb6)Ma6)Mb4GNb4GN;Asn
1499	Fa3(NNa3Ab4)GNb2Ma3(Fa3(Ab4)GNb2(GNb6)Ma6)Mb4GNb4GN;Asn
1500	Fa3(NNa3Ab4)GNb2Ma3(Aa3Ab4GNb2(GNb6)Ma6)Mb4GNb4GN;Asn
1501	Fa3(Ab4)GNb2Ma3(Fa3(NNa3Ab4)GNb2(GNb6)Ma6)Mb4GNb4GN;Asn
1502	Fa3(Aa3Ab4)GNb2Ma3(NNa3Ab4GNb2(GNb6)Ma6)Mb4GNb4GN;Asn
1503	GNb3Ab4GNb2Ma3(GNb2(Ab4GNb3Ab4GNb6)Ma6)Mb4GNb4GN;Asn
1504	Ab4GNb2Ma3(GNb2(GNb3Ab4GNb3Ab4GNb6)Ma6)Mb4GNb4GN;Asn
1505	NNa3Ab4GNb2Ma3(GNb2(Ab4GNb3Ab4GNb6)Ma6)Mb4GNb4GN;Asn
1506	Ab4GNb2Ma3(GNb2(NNa3Ab4GNb3Ab4GNb6)Ma6)Mb4GNb4GN;Asn
1507	Fa3(Ab4)GNb2Ma3(GNb2(Ab4GNb3Ab4GNb6)Ma6)Mb4GNb4GN;Asn
1508	Ab4GNb2Ma3(GNb2(Fa3(Ab4)GNb3Ab4GNb6)Ma6)Mb4GNb4GN;Asn
1509	Ab4GNb2Ma3(GNb2(Fa3(Ab4GNb3Ab4)GNb6)Ma6)Mb4GNb4GN;Asn
1510	Aa3Ab4GNb2Ma3(GNb2(Ab4GNb3Ab4GNb6)Ma6)Mb4GNb4GN;Asn
1511	Ab4GNb2Ma3(GNb2(Aa3Ab4GNb3Ab4GNb6)Ma6)Mb4GNb4GN;Asn
1512	Fa3(NNa3Ab4)GNb2Ma3(GNb2(GNb3Ab4GNb6)Ma6)Mb4GNb4GN;Asn
1513	NNa3Ab4GNb2Ma3(GNb2(Fa3(GNb3Ab4)GNb6)Ma6)Mb4GNb4GN;Asn
1514	Fa3(Ab4)GNb2Ma3(GNb2(Fa3(GNb3Ab4)GNb6)Ma6)Mb4GNb4GN;Asn
1515	Fa3(NNa3Ab4)GNb2Ma3(GNb2(NNa3Ab4GNb6)Ma6)Mb4GNb4GN;Asn
1516	NNa3Ab4GNb2Ma3(GNb2(Fa3(NNa3Ab4)GNb6)Ma6)Mb4GNb4GN;Asn
1517	Fa3(NNa3Ab4)GNb2Ma3(GNb2(Fa3(Ab4)GNb6)Ma6)Mb4GNb4GN;Asn
1518	Fa3(NNa3Ab4)GNb2Ma3(GNb2(Aa3Ab4GNb6)Ma6)Mb4GNb4GN;Asn
1519	NNa3Ab4GNb2Ma3(GNb2(Fa3(Aa3Ab4)GNb6)Ma6)Mb4GNb4GN;Asn
1520	Fa3(Ab4)GNb2Ma3(GNb2(Fa3(NNa3Ab4)GNb6)Ma6)Mb4GNb4GN;Asn
1521	Aa3Ab4GNb2Ma3(GNb2(Fa3(NNa3Ab4)GNb6)Ma6)Mb4GNb4GN;Asn
1522	Fa3(Aa3Ab4)GNb2Ma3(GNb2(NNa3Ab4GNb6)Ma6)Mb4GNb4GN;Asn
1523	Fa3(Ab4)GNb2Ma3(GNb2(Fa3(Aa3Ab4)GNb6)Ma6)Mb4GNb4GN;Asn
1524	Fa3(Aa3Ab4)GNb2Ma3(GNb2(Fa3(Ab4)GNb6)Ma6)Mb4GNb4GN;Asn
1525	GNb2Ma3(GNb3Ab4GNb3Ab4GNb2(Ab4GNb6)Ma6)Mb4GNb4GN;Asn
1526	GNb2Ma3(Ab4GNb3Ab4GNb2(GNb3Ab4GNb6)Ma6)Mb4GNb4GN;Asn
1527	GNb2Ma3(NNa3Ab4GNb3Ab4GNb2(Ab4GNb6)Ma6)Mb4GNb4GN;Asn
1528	GNb2Ma3(Ab4GNb3Ab4GNb2(NNa3Ab4GNb6)Ma6)Mb4GNb4GN;Asn
1529	GNb2Ma3(Fa3(Ab4)GNb3Ab4GNb2(Ab4GNb6)Ma6)Mb4GNb4GN;Asn
1530	GNb2Ma3(Fa3(Ab4GNb3Ab4)GNb2(Ab4GNb6)Ma6)Mb4GNb4GN;Asn
1531	GNb2Ma3(Ab4GNb3Ab4GNb2(Fa3(Ab4)GNb6)Ma6)Mb4GNb4GN;Asn
1532	GNb2Ma3(Aa3Ab4GNb3Ab4GNb2(Ab4GNb6)Ma6)Mb4GNb4GN;Asn
1533	GNb2Ma3(Ab4GNb3Ab4GNb2(Aa3Ab4GNb6)Ma6)Mb4GNb4GN;Asn
1534	GNb2Ma3(GNb3Ab4GNb2(Ab4GNb3Ab4GNb6)Ma6)Mb4GNb4GN;Asn
1535	GNb2Ma3(Ab4GNb2(GNb3Ab4GNb3Ab4GNb6)Ma6)Mb4GNb4GN;Asn
1536	GNb2Ma3(NNa3Ab4GNb2(Ab4GNb3Ab4GNb6)Ma6)Mb4GNb4GN;Asn
1537	GNb2Ma3(Ab4GNb2(NNa3Ab4GNb3Ab4GNb6)Ma6)Mb4GNb4GN;Asn
1538	GNb2Ma3(Fa3(Ab4)GNb2(Ab4GNb3Ab4GNb6)Ma6)Mb4GNb4GN;Asn
1539	GNb2Ma3(Ab4GNb2(Fa3(Ab4)GNb3Ab4GNb6)Ma6)Mb4GNb4GN;Asn
1540	GNb2Ma3(Ab4GNb2(Fa3(Ab4GNb3Ab4)GNb6)Ma6)Mb4GNb4GN;Asn
1541	GNb2Ma3(Aa3Ab4GNb2(Ab4GNb3Ab4GNb6)Ma6)Mb4GNb4GN;Asn
1542	GNb2Ma3(Ab4GNb2(Aa3Ab4GNb3Ab4GNb6)Ma6)Mb4GNb4GN;Asn
1543	GNb2Ma3(Fa3(NNa3Ab4)GNb2(NNa3Ab4GNb6)Ma6)Mb4GNb4GN;Asn
1544	GNb2Ma3(NNa3Ab4GNb2(Fa3(NNa3Ab4)GNb6)Ma6)Mb4GNb4GN;Asn
1545	GNb2Ma3(Fa3(NNa3Ab4)GNb2(Fa3(Ab4)GNb6)Ma6)Mb4GNb4GN;Asn
1546	GNb2Ma3(Fa3(Ab4)GNb2(Fa3(NNa3Ab4)GNb6)Ma6)Mb4GNb4GN;Asn
1547	GNb2Ma3(GNb2(Ab4GNb3Ab4GNb3Ab4GNb6)Ma6)Mb4GNb4GN;Asn
1548	GNb2Ma3(GNb2(Fa3(NNa3Ab4GNb3Ab4)GNb6)Ma6)Mb4GNb4GN;Asn
1549	NNa3Ab4GNb3Ab4GNb2Ma3(NNa3Ab4GNb2Ma6)Mb4GNb4GN;Asn
1550	NNa3Ab4GNb2Ma3(NNa3Ab4GNb3Ab4GNb2Ma6)Mb4GNb4GN;Asn
1551	Fa3(NNa3Ab4)GNb2Ma3(Ab4GNb3Ab4GNb2Ma6)Mb4GNb4GN;Asn
1552	NNa3Ab4GNb2Ma3(Fa3(Ab4GNb3Ab4)GNb2Ma6)Mb4GNb4GN;Asn
1553	Ab4GNb2Ma3(Fa3(NNa3Ab4GNb3Ab4)GNb2Ma6)Mb4GNb4GN;Asn
1554	Fa3(NNa3Ab4)GNb2Ma3(Fa3(NNa3Ab4)GNb2Ma6)Mb4GNb4GN;Asn
1555	Fa3(NNa3Ab4)GNb2Ma3(Fa3(Aa3Ab4)GNb2Ma6)Mb4GNb4GN;Asn
1556	Fa3(Aa3Ab4)GNb2Ma3(Fa3(NNa3Ab4)GNb2Ma6)Mb4GNb4GN;Asn
1557	Fa3(NNa3Ab4)GNb2Ma3(GNb4)(Fa3(Ab4)GNb2Ma6)Mb4GNb4(Fa6)GN;Asn
1558	Fa3(Ab4)GNb2Ma3(GNb4)(Fa3(NNa3Ab4)GNb2Ma6)Mb4GNb4(Fa6)GN;Asn
1559	NNa3Ab4GNb2(Ab4GNb4)Ma3(GNb4)(Ab4GNb2Ma6)Mb4GNb4(Fa6)GN;Asn
1560	Ab4GNb2(NNa3Ab4GNb4)Ma3(GNb4)(Ab4GNb2Ma6)Mb4GNb4(Fa6)GN;Asn
1561	Ab4GNb2(Ab4GNb4)Ma3(GNb4)(NNa3Ab4GNb2Ma6)Mb4GNb4(Fa6)GN;Asn
1562	Fa3(Ab4)GNb2(Ab4GNb4)Ma3(GNb4)(Ab4GNb2Ma6)Mb4GNb4(Fa6)GN;Asn
1563	Ab4GNb2(Fa3(Ab4)GNb4)Ma3(GNb4)(Ab4GNb2Ma6)Mb4GNb4(Fa6)GN;Asn
1564	Ab4GNb2(Ab4GNb4)Ma3(GNb4)(Fa3(Ab4)GNb2Ma6)Mb4GNb4(Fa6)GN;Asn
1565	Ab4GNb2(Ab4GNb4)Ma3(GNb4)(Ab4GNb2(GNb6)Ma6)Mb4GNb4(Fa6)GN;Asn
1566	Ab4GNb2(Ab4GNb4)Ma3(GNb4)(GNb2(Ab4GNb6)Ma6)Mb4GNb4(Fa6)GN;Asn
1567	NNa3Ab4GNb2(Ab4GNb4)Ma3(GNb4)(GNb2(GNb6)Ma6)Mb4GNb4(Fa6)GN;Asn
1568	Ab4GNb2(NNa3Ab4GNb4)Ma3(GNb4)(GNb2(GNb6)Ma6)Mb4GNb4(Fa6)GN;Asn
1569	Fa3(Ab4)GNb2(Ab4GNb4)Ma3(GNb4)(GNb2(GNb6)Ma6)Mb4GNb4(Fa6)GN;Asn
1570	Ab4GNb2(Fa3(Ab4)GNb4)Ma3(GNb4)(GNb2(GNb6)Ma6)Mb4GNb4(Fa6)GN;Asn
1571	Aa3Ab4GNb2(Ab4GNb4)Ma3(GNb4)(GNb2(GNb6)Ma6)Mb4GNb4(Fa6)GN;Asn
1572	Ab4GNb2(Aa3Ab4GNb4)Ma3(GNb4)(GNb2(GNb6)Ma6)Mb4GNb4(Fa6)GN;Asn
1573	Ab4GNb2(GNb4)Ma3(GNb4)(Ab4GNb2(Ab4GNb6)Ma6)Mb4GNb4(Fa6)GN;Asn
1574	NNa3Ab4GNb2(GNb4)Ma3(GNb4)(Ab4GNb2(GNb6)Ma6)Mb4GNb4(Fa6)GN;Asn
1575	Ab4GNb2(GNb4)Ma3(GNb4)(NNa3Ab4GNb2(GNb6)Ma6)Mb4GNb4(Fa6)GN;Asn
1576	Fa3(Ab4)GNb2(GNb4)Ma3(GNb4)(Ab4GNb2(GNb6)Ma6)Mb4GNb4(Fa6)GN;Asn
1577	NNa3Ab4GNb2(GNb4)Ma3(GNb4)(GNb2(Ab4GNb6)Ma6)Mb4GNb4(Fa6)GN;Asn
1578	Ab4GNb2(GNb4)Ma3(GNb4)(GNb2(NNa3Ab4GNb6)Ma6)Mb4GNb4(Fa6)GN;Asn
1579	Fa3(Ab4)GNb2(GNb4)Ma3(GNb4)(GNb2(Ab4GNb6)Ma6)Mb4GNb4(Fa6)GN;Asn
1580	Ab4GNb2(GNb4)Ma3(GNb4)(GNb2(Fa3(Ab4)GNb6)Ma6)Mb4GNb4(Fa6)GN;Asn
1581	Aa3Ab4GNb2(GNb4)Ma3(GNb4)(GNb2(Ab4GNb6)Ma6)Mb4GNb4(Fa6)GN;Asn
1582	Ab4GNb2(GNb4)Ma3(GNb4)(GNb2(Aa3Ab4GNb6)Ma6)Mb4GNb4(Fa6)GN;Asn
1583	GNb2(Ab4GNb4)Ma3(GNb4)(Ab4GNb2(Ab4GNb6)Ma6)Mb4GNb4(Fa6)GN;Asn
1584	GNb2(NNa3Ab4GNb4)Ma3(GNb4)(Ab4GNb2(GNb6)Ma6)Mb4GNb4(Fa6)GN;Asn
1585	GNb2(Ab4GNb4)Ma3(GNb4)(NNa3Ab4GNb2(GNb6)Ma6)Mb4GNb4(Fa6)GN;Asn
1586	GNb2(Fa3(Ab4)GNb4)Ma3(GNb4)(Ab4GNb2(GNb6)Ma6)Mb4GNb4(Fa6)GN;Asn
1587	GNb2(Ab4GNb4)Ma3(GNb4)(Fa3(Ab4)GNb2(GNb6)Ma6)Mb4GNb4(Fa6)GN;Asn
1588	GNb2(Ab4GNb4)Ma3(GNb4)(GNb2(GNb3Ab4GNb6)Ma6)Mb4GNb4(Fa6)GN;Asn
1589	GNb2(NNa3Ab4GNb4)Ma3(GNb4)(GNb2(Ab4GNb6)Ma6)Mb4GNb4(Fa6)GN;Asn
1590	GNb2(Ab4GNb4)Ma3(GNb4)(GNb2(NNa3Ab4GNb6)Ma6)Mb4GNb4(Fa6)GN;Asn
1591	GNb2(Fa3(Ab4)GNb4)Ma3(GNb4)(GNb2(Ab4GNb6)Ma6)Mb4GNb4(Fa6)GN;Asn
1592	GNb2(Ab4GNb4)Ma3(GNb4)(GNb2(Fa3(Ab4)GNb6)Ma6)Mb4GNb4(Fa6)GN;Asn
1593	GNb2(Aa3Ab4GNb4)Ma3(GNb4)(GNb2(Ab4GNb6)Ma6)Mb4GNb4(Fa6)GN;Asn
1594	GNb2(Ab4GNb4)Ma3(GNb4)(GNb2(Aa3Ab4GNb6)Ma6)Mb4GNb4(Fa6)GN;Asn
1595	GNb2(GNb4)Ma3(GNb4)(NNa3Ab4GNb2(Ab4GNb6)Ma6)Mb4GNb4(Fa6)GN;Asn
1596	GNb2(GNb4)Ma3(GNb4)(Ab4GNb2(NNa3Ab4GNb6)Ma6)Mb4GNb4(Fa6)GN;Asn
1597	GNb2(GNb4)Ma3(GNb4)(Ab4GNb2(Fa3(Ab4)GNb6)Ma6)Mb4GNb4(Fa6)GN;Asn
1598	Ab4GNb3Ab4GNb2(Ab4GNb4)Ma3(GNb2(GNb6)Ma6)Mb4GNb4(Fa6)GN;Asn
1599	GNb3Ab4GNb2(Ab4GNb4)Ma3(Ab4GNb2(GNb6)Ma6)Mb4GNb4(Fa6)GN;Asn
1600	GNb3Ab4GNb2(Ab4GNb4)Ma3(GNb2(Ab4GNb6)Ma6)Mb4GNb4(Fa6)GN;Asn
1601	Ab4GNb2(Ab4GNb3Ab4GNb4)Ma3(GNb2(GNb6)Ma6)Mb4GNb4(Fa6)GN;Asn
1602	Ab4GNb2(GNb3Ab4GNb4)Ma3(Ab4GNb2(GNb6)Ma6)Mb4GNb4(Fa6)GN;Asn
1603	Ab4GNb2(GNb3Ab4GNb4)Ma3(GNb2(Ab4GNb6)Ma6)Mb4GNb4(Fa6)GN;Asn
1604	Ab4GNb2(Ab4GNb4)Ma3(GNb3Ab4GNb2(GNb6)Ma6)Mb4GNb4(Fa6)GN;Asn
1605	Ab4GNb2(Ab4GNb4)Ma3(Ab4GNb2(Ab4GNb6)Ma6)Mb4GNb4(Fa6)GN;Asn
1606	NNa3Ab4GNb2(Ab4GNb4)Ma3(Ab4GNb2(GNb6)Ma6)Mb4GNb4(Fa6)GN;Asn
1607	Ab4GNb2(NNa3Ab4GNb4)Ma3(Ab4GNb2(GNb6)Ma6)Mb4GNb4(Fa6)GN;Asn
1608	Ab4GNb2(Ab4GNb4)Ma3(NNa3Ab4GNb2(GNb6)Ma6)Mb4GNb4(Fa6)GN;Asn
1609	Fa3(Ab4)GNb2(Ab4GNb4)Ma3(Ab4GNb2(GNb6)Ma6)Mb4GNb4(Fa6)GN;Asn
1610	Ab4GNb2(Fa3(Ab4)GNb4)Ma3(Ab4GNb2(GNb6)Ma6)Mb4GNb4(Fa6)GN;Asn
1611	Ab4GNb2(Ab4GNb4)Ma3(Fa3(Ab4)GNb2(GNb6)Ma6)Mb4GNb4(Fa6)GN;Asn
1612	Aa3Ab4GNb2(Ab4GNb4)Ma3(Ab4GNb2(GNb6)Ma6)Mb4GNb4(Fa6)GN;Asn
1613	Ab4GNb2(Aa3Ab4GNb4)Ma3(Ab4GNb2(GNb6)Ma6)Mb4GNb4(Fa6)GN;Asn
1614	Ab4GNb2(Ab4GNb4)Ma3(Aa3Ab4GNb2(GNb6)Ma6)Mb4GNb4(Fa6)GN;Asn
1615	Ab4GNb2(Ab4GNb4)Ma3(GNb2(GNb3Ab4GNb6)Ma6)Mb4GNb4(Fa6)GN;Asn
1616	NNa3Ab4GNb2(Ab4GNb4)Ma3(GNb2(Ab4GNb6)Ma6)Mb4GNb4(Fa6)GN;Asn
1617	Ab4GNb2(NNa3Ab4GNb4)Ma3(GNb2(Ab4GNb6)Ma6)Mb4GNb4(Fa6)GN;Asn
1618	Ab4GNb2(Ab4GNb4)Ma3(GNb2(NNa3Ab4GNb6)Ma6)Mb4GNb4(Fa6)GN;Asn
1619	Fa3(Ab4)GNb2(Ab4GNb4)Ma3(GNb2(Ab4GNb6)Ma6)Mb4GNb4(Fa6)GN;Asn
1620	Ab4GNb2(Fa3(Ab4)GNb4)Ma3(GNb2(Ab4GNb6)Ma6)Mb4GNb4(Fa6)GN;Asn
1621	Ab4GNb2(Ab4GNb4)Ma3(GNb2(Fa3(Ab4)GNb6)Ma6)Mb4GNb4(Fa6)GN;Asn
1622	Aa3Ab4GNb2(Ab4GNb4)Ma3(GNb2(Ab4GNb6)Ma6)Mb4GNb4(Fa6)GN;Asn
1623	Ab4GNb2(Aa3Ab4GNb4)Ma3(GNb2(Ab4GNb6)Ma6)Mb4GNb4(Fa6)GN;Asn
1624	Ab4GNb2(Ab4GNb4)Ma3(GNb2(Aa3Ab4GNb6)Ma6)Mb4GNb4(Fa6)GN;Asn
1625	NNa3Ab4GNb2(NNa3Ab4GNb4)Ma3(GNb2(GNb6)Ma6)Mb4GNb4(Fa6)GN;Asn
1626	Fa3(NNa3Ab4)GNb2(Ab4GNb4)Ma3(GNb2(GNb6)Ma6)Mb4GNb4(Fa6)GN;Asn
1627	NNa3Ab4GNb2(Fa3(Ab4)GNb4)Ma3(GNb2(GNb6)Ma6)Mb4GNb4(Fa6)GN;Asn
1628	NNa3Ab4GNb2(Aa3Ab4GNb4)Ma3(GNb2(GNb6)Ma6)Mb4GNb4(Fa6)GN;Asn
1629	Fa3(Ab4)GNb2(NNa3Ab4GNb4)Ma3(GNb2(GNb6)Ma6)Mb4GNb4(Fa6)GN;Asn
1630	Ab4GNb2(Fa3(NNa3Ab4)GNb4)Ma3(GNb2(GNb6)Ma6)Mb4GNb4(Fa6)GN;Asn
1631	Aa3Ab4GNb2(NNa3Ab4GNb4)Ma3(GNb2(GNb6)Ma6)Mb4GNb4(Fa6)GN;Asn
1632	Fa3(Ab4)GNb2(Fa3(Ab4)GNb4)Ma3(GNb2(GNb6)Ma6)Mb4GNb4(Fa6)GN;Asn
1633	Fa3(Ab4)GNb2(Aa3Ab4GNb4)Ma3(GNb2(GNb6)Ma6)Mb4GNb4(Fa6)GN;Asn
1634	Aa3Ab4GNb2(Fa3(Ab4)GNb4)Ma3(GNb2(GNb6)Ma6)Mb4GNb4(Fa6)GN;Asn
1635	Fa3(Aa3Ab4)GNb2(Ab4GNb4)Ma3(GNb2(GNb6)Ma6)Mb4GNb4(Fa6)GN;Asn
1636	Ab4GNb2(Fa3(Aa3Ab4)GNb4)Ma3(GNb2(GNb6)Ma6)Mb4GNb4(Fa6)GN;Asn
1637	Ab4GNb2(GNb4)Ma3(Ab4GNb3Ab4GNb2(GNb6)Ma6)Mb4GNb4(Fa6)GN;Asn
1638	Ab4GNb2(GNb4)Ma3(GNb3Ab4GNb2(Ab4GNb6)Ma6)Mb4GNb4(Fa6)GN;Asn
1639	GNb3Ab4GNb2(GNb4)Ma3(Ab4GNb2(Ab4GNb6)Ma6)Mb4GNb4(Fa6)GN;Asn
1640	Ab4GNb2(GNb4)Ma3(Ab4GNb2(GNb3Ab4GNb6)Ma6)Mb4GNb4(Fa6)GN;Asn
1641	NNa3Ab4GNb2(GNb4)Ma3(Ab4GNb2(Ab4GNb6)Ma6)Mb4GNb4(Fa6)GN;Asn
1642	Ab4GNb2(GNb4)Ma3(NNa3Ab4GNb2(Ab4GNb6)Ma6)Mb4GNb4(Fa6)GN;Asn
1643	Ab4GNb2(GNb4)Ma3(Ab4GNb2(NNa3Ab4GNb6)Ma6)Mb4GNb4(Fa6)GN;Asn
1644	Fa3(Ab4)GNb2(GNb4)Ma3(Ab4GNb2(Ab4GNb6)Ma6)Mb4GNb4(Fa6)GN;Asn
1645	Ab4GNb2(GNb4)Ma3(Fa3(Ab4)GNb2(Ab4GNb6)Ma6)Mb4GNb4(Fa6)GN;Asn
1646	Ab4GNb2(GNb4)Ma3(Ab4GNb2(Fa3(Ab4)GNb6)Ma6)Mb4GNb4(Fa6)GN;Asn
1647	Aa3Ab4GNb2(GNb4)Ma3(Ab4GNb2(Ab4GNb6)Ma6)Mb4GNb4(Fa6)GN;Asn
1648	Ab4GNb2(GNb4)Ma3(Aa3Ab4GNb2(Ab4GNb6)Ma6)Mb4GNb4(Fa6)GN;Asn
1649	Ab4GNb2(GNb4)Ma3(Ab4GNb2(Aa3Ab4GNb6)Ma6)Mb4GNb4(Fa6)GN;Asn
1650	NNa3Ab4GNb2(GNb4)Ma3(NNa3Ab4GNb2(GNb6)Ma6)Mb4GNb4(Fa6)GN;Asn
1651	Fa3(NNa3Ab4)GNb2(GNb4)Ma3(Ab4GNb2(GNb6)Ma6)Mb4GNb4(Fa6)GN;Asn
1652	NNa3Ab4GNb2(GNb4)Ma3(Fa3(Ab4)GNb2(GNb6)Ma6)Mb4GNb4(Fa6)GN;Asn
1653	Fa3(Ab4)GNb2(GNb4)Ma3(NNa3Ab4GNb2(GNb6)Ma6)Mb4GNb4(Fa6)GN;Asn
1654	Ab4GNb2(GNb4)Ma3(Fa3(NNa3Ab4)GNb2(GNb6)Ma6)Mb4GNb4(Fa6)GN;Asn
1655	Fa3(Ab4)GNb2(GNb4)Ma3(Fa3(Ab4)GNb2(GNb6)Ma6)Mb4GNb4(Fa6)GN;Asn
1656	Ab4GNb3Ab4GNb2(GNb4)Ma3(GNb2(Ab4GNb6)Ma6)Mb4GNb4(Fa6)GN;Asn
1657	Ab4GNb2(GNb4)Ma3(GNb2(Ab4GNb3Ab4GNb6)Ma6)Mb4GNb4(Fa6)GN;Asn
1658	NNa3Ab4GNb2(GNb4)Ma3(GNb2(GNb3Ab4GNb6)Ma6)Mb4GNb4(Fa6)GN;Asn
1659	Fa3(Ab4)GNb2(GNb4)Ma3(GNb2(GNb3Ab4GNb6)Ma6)Mb4GNb4(Fa6)GN;Asn
1660	NNa3Ab4GNb2(GNb4)Ma3(GNb2(NNa3Ab4GNb6)Ma6)Mb4GNb4(Fa6)GN;Asn
1661	Fa3(NNa3Ab4)GNb2(GNb4)Ma3(GNb2(Ab4GNb6)Ma6)Mb4GNb4(Fa6)GN;Asn
1662	NNa3Ab4GNb2(GNb4)Ma3(GNb2(Fa3(Ab4)GNb6)Ma6)Mb4GNb4(Fa6)GN;Asn
1663	NNa3Ab4GNb2(GNb4)Ma3(GNb2(Aa3Ab4GNb6)Ma6)Mb4GNb4(Fa6)GN;Asn
1664	Fa3(Ab4)GNb2(GNb4)Ma3(GNb2(NNa3Ab4GNb6)Ma6)Mb4GNb4(Fa6)GN;Asn
1665	Ab4GNb2(GNb4)Ma3(GNb2(Fa3(NNa3Ab4)GNb6)Ma6)Mb4GNb4(Fa6)GN;Asn
1666	Aa3Ab4GNb2(GNb4)Ma3(GNb2(NNa3Ab4GNb6)Ma6)Mb4GNb4(Fa6)GN;Asn
1667	Fa3(Ab4)GNb2(GNb4)Ma3(GNb2(Fa3(Ab4)GNb6)Ma6)Mb4GNb4(Fa6)GN;Asn
1668	Fa3(Ab4)GNb2(GNb4)Ma3(GNb2(Aa3Ab4GNb6)Ma6)Mb4GNb4(Fa6)GN;Asn
1669	Aa3Ab4GNb2(GNb4)Ma3(GNb2(Fa3(Ab4)GNb6)Ma6)Mb4GNb4(Fa6)GN;Asn
1670	Fa3(Aa3Ab4)GNb2(GNb4)Ma3(GNb2(Ab4GNb6)Ma6)Mb4GNb4(Fa6)GN;Asn
1671	GNb2(Ab4GNb3Ab4GNb4)Ma3(Ab4GNb2(GNb6)Ma6)Mb4GNb4(Fa6)GN;Asn
1672	GNb2(Ab4GNb3Ab4GNb4)Ma3(GNb2(Ab4GNb6)Ma6)Mb4GNb4(Fa6)GN;Asn
1673	GNb2(GNb3Ab4GNb4)Ma3(Ab4GNb2(Ab4GNb6)Ma6)Mb4GNb4(Fa6)GN;Asn
1674	GNb2(Ab4GNb4)Ma3(Ab4GNb3Ab4GNb2(GNb6)Ma6)Mb4GNb4(Fa6)GN;Asn
1675	GNb2(Ab4GNb4)Ma3(GNb3Ab4GNb2(Ab4GNb6)Ma6)Mb4GNb4(Fa6)GN;Asn
1676	GNb2(NNa3Ab4GNb4)Ma3(GNb3Ab4GNb2(GNb6)Ma6)Mb4GNb4(Fa6)GN;Asn
1677	GNb2(Ab4GNb4)Ma3(Ab4GNb2(GNb3Ab4GNb6)Ma6)Mb4GNb4(Fa6)GN;Asn
1678	GNb2(NNa3Ab4GNb4)Ma3(Ab4GNb2(Ab4GNb6)Ma6)Mb4GNb4(Fa6)GN;Asn
1679	GNb2(Ab4GNb4)Ma3(NNa3Ab4GNb2(Ab4GNb6)Ma6)Mb4GNb4(Fa6)GN;Asn
1680	GNb2(Ab4GNb4)Ma3(Ab4GNb2(NNa3Ab4GNb6)Ma6)Mb4GNb4(Fa6)GN;Asn
1681	GNb2(Fa3(Ab4)GNb4)Ma3(Ab4GNb2(Ab4GNb6)Ma6)Mb4GNb4(Fa6)GN;Asn
1682	GNb2(Ab4GNb4)Ma3(Fa3(Ab4)GNb2(Ab4GNb6)Ma6)Mb4GNb4(Fa6)GN;Asn
1683	GNb2(Ab4GNb4)Ma3(Ab4GNb2(Fa3(Ab4)GNb6)Ma6)Mb4GNb4(Fa6)GN;Asn
1684	GNb2(Aa3Ab4GNb4)Ma3(Ab4GNb2(Ab4GNb6)Ma6)Mb4GNb4(Fa6)GN;Asn
1685	GNb2(Ab4GNb4)Ma3(Aa3Ab4GNb2(Ab4GNb6)Ma6)Mb4GNb4(Fa6)GN;Asn
1686	GNb2(Ab4GNb4)Ma3(Ab4GNb2(Aa3Ab4GNb6)Ma6)Mb4GNb4(Fa6)GN;Asn
1687	GNb2(NNa3Ab4GNb4)Ma3(NNa3Ab4GNb2(GNb6)Ma6)Mb4GNb4(Fa6)GN;Asn
1688	GNb2(Fa3(NNa3Ab4)GNb4)Ma3(Ab4GNb2(GNb6)Ma6)Mb4GNb4(Fa6)GN;Asn
1689	GNb2(NNa3Ab4GNb4)Ma3(Fa3(Ab4)GNb2(GNb6)Ma6)Mb4GNb4(Fa6)GN;Asn
1690	GNb2(NNa3Ab4GNb4)Ma3(Aa3Ab4GNb2(GNb6)Ma6)Mb4GNb4(Fa6)GN;Asn
1691	GNb2(Fa3(Ab4)GNb4)Ma3(NNa3Ab4GNb2(GNb6)Ma6)Mb4GNb4(Fa6)GN;Asn
1692	GNb2(Ab4GNb4)Ma3(Fa3(NNa3Ab4)GNb2(GNb6)Ma6)Mb4GNb4(Fa6)GN;Asn
1693	GNb2(Aa3Ab4GNb4)Ma3(NNa3Ab4GNb2(GNb6)Ma6)Mb4GNb4(Fa6)GN;Asn
1694	GNb2(Fa3(Ab4)GNb4)Ma3(Fa3(Ab4)GNb2(GNb6)Ma6)Mb4GNb4(Fa6)GN;Asn
1695	GNb2(Ab4GNb4)Ma3(GNb2(Ab4GNb3Ab4GNb6)Ma6)Mb4GNb4(Fa6)GN;Asn
1696	GNb2(NNa3Ab4GNb4)Ma3(GNb2(GNb3Ab4GNb6)Ma6)Mb4GNb4(Fa6)GN;Asn
1697	GNb2(Fa3(Ab4)GNb4)Ma3(GNb2(GNb3Ab4GNb6)Ma6)Mb4GNb4(Fa6)GN;Asn
1698	GNb2(NNa3Ab4GNb4)Ma3(GNb2(NNa3Ab4GNb6)Ma6)Mb4GNb4(Fa6)GN;Asn
1699	GNb2(Fa3(NNa3Ab4)GNb4)Ma3(GNb2(Ab4GNb6)Ma6)Mb4GNb4(Fa6)GN;Asn
1700	GNb2(NNa3Ab4GNb4)Ma3(GNb2(Fa3(Ab4)GNb6)Ma6)Mb4GNb4(Fa6)GN;Asn
1701	GNb2(NNa3Ab4GNb4)Ma3(GNb2(Aa3Ab4GNb6)Ma6)Mb4GNb4(Fa6)GN;Asn
1702	GNb2(Fa3(Ab4)GNb4)Ma3(GNb2(NNa3Ab4GNb6)Ma6)Mb4GNb4(Fa6)GN;Asn
1703	GNb2(Ab4GNb4)Ma3(GNb2(Fa3(NNa3Ab4)GNb6)Ma6)Mb4GNb4(Fa6)GN;Asn
1704	GNb2(Aa3Ab4GNb4)Ma3(GNb2(NNa3Ab4GNb6)Ma6)Mb4GNb4(Fa6)GN;Asn
1705	GNb2(Fa3(Ab4)GNb4)Ma3(GNb2(Fa3(Ab4)GNb6)Ma6)Mb4GNb4(Fa6)GN;Asn
1706	GNb2(Fa3(Ab4)GNb4)Ma3(GNb2(Aa3Ab4GNb6)Ma6)Mb4GNb4(Fa6)GN;Asn
1707	GNb2(Aa3Ab4GNb4)Ma3(GNb2(Fa3(Ab4)GNb6)Ma6)Mb4GNb4(Fa6)GN;Asn
1708	GNb2(Fa3(Aa3Ab4)GNb4)Ma3(GNb2(Ab4GNb6)Ma6)Mb4GNb4(Fa6)GN;Asn
1709	GNb2(Ab4GNb4)Ma3(GNb2(Fa3(Aa3Ab4)GNb6)Ma6)Mb4GNb4(Fa6)GN;Asn
1710	GNb2(GNb4)Ma3(Ab4GNb3Ab4GNb2(Ab4GNb6)Ma6)Mb4GNb4(Fa6)GN;Asn
1711	GNb2(GNb4)Ma3(Ab4GNb2(Ab4GNb3Ab4GNb6)Ma6)Mb4GNb4(Fa6)GN;Asn
1712	GNb2(GNb4)Ma3(NNa3Ab4GNb2(NNa3Ab4GNb6)Ma6)Mb4GNb4(Fa6)GN;Asn
1713	GNb2(GNb4)Ma3(Fa3(NNa3Ab4)GNb2(Ab4GNb6)Ma6)Mb4GNb4(Fa6)GN;Asn
1714	GNb2(GNb4)Ma3(NNa3Ab4GNb2(Fa3(Ab4)GNb6)Ma6)Mb4GNb4(Fa6)GN;Asn
1715	GNb2(GNb4)Ma3(NNa3Ab4GNb2(Aa3Ab4GNb6)Ma6)Mb4GNb4(Fa6)GN;Asn
1716	GNb2(GNb4)Ma3(Fa3(Ab4)GNb2(NNa3Ab4GNb6)Ma6)Mb4GNb4(Fa6)GN;Asn
1717	GNb2(GNb4)Ma3(Ab4GNb2(Fa3(NNa3Ab4)GNb6)Ma6)Mb4GNb4(Fa6)GN;Asn
1718	GNb2(GNb4)Ma3(Aa3Ab4GNb2(NNa3Ab4GNb6)Ma6)Mb4GNb4(Fa6)GN;Asn
1719	GNb2(GNb4)Ma3(Fa3(Ab4)GNb2(Fa3(Ab4)GNb6)Ma6)Mb4GNb4(Fa6)GN;Asn
1720	GNb2(GNb4)Ma3(GNb2(NNa3Ab4GNb3Ab4GNb6)Ma6)Mb4GNb4(Fa6)GN;Asn
1721	Ab4GNb3Ab4GNb2(Ab4GNb4)Ma3(Ab4GNb2Ma6)Mb4GNb4(Fa6)GN;Asn
1722	Ab4GNb2(Ab4GNb3Ab4GNb4)Ma3(Ab4GNb2Ma6)Mb4GNb4(Fa6)GN;Asn
1723	Ab4GNb2(Ab4GNb4)Ma3(Ab4GNb3Ab4GNb2Ma6)Mb4GNb4(Fa6)GN;Asn
1724	NNa3Ab4GNb2(Ab4GNb4)Ma3(GNb3Ab4GNb2Ma6)Mb4GNb4(Fa6)GN;Asn
1725	Ab4GNb2(NNa3Ab4GNb4)Ma3(GNb3Ab4GNb2Ma6)Mb4GNb4(Fa6)GN;Asn
1726	NNa3Ab4GNb2(NNa3Ab4GNb4)Ma3(Ab4GNb2Ma6)Mb4GNb4(Fa6)GN;Asn
1727	NNa3Ab4GNb2(Ab4GNb4)Ma3(NNa3Ab4GNb2Ma6)Mb4GNb4(Fa6)GN;Asn
1728	Fa3(NNa3Ab4)GNb2(Ab4GNb4)Ma3(Ab4GNb2Ma6)Mb4GNb4(Fa6)GN;Asn
1729	NNa3Ab4GNb2(Fa3(Ab4)GNb4)Ma3(Ab4GNb2Ma6)Mb4GNb4(Fa6)GN;Asn
1730	NNa3Ab4GNb2(Ab4GNb4)Ma3(Fa3(Ab4)GNb2Ma6)Mb4GNb4(Fa6)GN;Asn
1731	NNa3Ab4GNb2(Aa3Ab4GNb4)Ma3(Ab4GNb2Ma6)Mb4GNb4(Fa6)GN;Asn
1732	NNa3Ab4GNb2(Ab4GNb4)Ma3(Aa3Ab4GNb2Ma6)Mb4GNb4(Fa6)GN;Asn
1733	Ab4GNb2(NNa3Ab4GNb4)Ma3(NNa3Ab4GNb2Ma6)Mb4GNb4(Fa6)GN;Asn
1734	Fa3(Ab4)GNb2(NNa3Ab4GNb4)Ma3(Ab4GNb2Ma6)Mb4GNb4(Fa6)GN;Asn
1735	Ab4GNb2(Fa3(NNa3Ab4)GNb4)Ma3(Ab4GNb2Ma6)Mb4GNb4(Fa6)GN;Asn
1736	Ab4GNb2(NNa3Ab4GNb4)Ma3(Fa3(Ab4)GNb2Ma6)Mb4GNb4(Fa6)GN;Asn
1737	Aa3Ab4GNb2(NNa3Ab4GNb4)Ma3(Ab4GNb2Ma6)Mb4GNb4(Fa6)GN;Asn
1738	Ab4GNb2(NNa3Ab4GNb4)Ma3(Aa3Ab4GNb2Ma6)Mb4GNb4(Fa6)GN;Asn
1739	Fa3(Ab4)GNb2(Ab4GNb4)Ma3(NNa3Ab4GNb2Ma6)Mb4GNb4(Fa6)GN;Asn
1740	Ab4GNb2(Fa3(Ab4)GNb4)Ma3(NNa3Ab4GNb2Ma6)Mb4GNb4(Fa6)GN;Asn
1741	Ab4GNb2(Ab4GNb4)Ma3(Fa3(NNa3Ab4)GNb2Ma6)Mb4GNb4(Fa6)GN;Asn
1742	Aa3Ab4GNb2(Ab4GNb4)Ma3(NNa3Ab4GNb2Ma6)Mb4GNb4(Fa6)GN;Asn
1743	Ab4GNb2(Aa3Ab4GNb4)Ma3(NNa3Ab4GNb2Ma6)Mb4GNb4(Fa6)GN;Asn
1744	Fa3(Ab4)GNb2(Fa3(Ab4)GNb4)Ma3(Ab4GNb2Ma6)Mb4GNb4(Fa6)GN;Asn
1745	Fa3(Ab4)GNb2(Ab4GNb4)Ma3(Fa3(Ab4)GNb2Ma6)Mb4GNb4(Fa6)GN;Asn
1746	Fa3(Ab4)GNb2(Aa3Ab4GNb4)Ma3(Ab4GNb2Ma6)Mb4GNb4(Fa6)GN;Asn
1747	Fa3(Ab4)GNb2(Ab4GNb4)Ma3(Aa3Ab4GNb2Ma6)Mb4GNb4(Fa6)GN;Asn
1748	Ab4GNb2(Fa3(Ab4)GNb4)Ma3(Fa3(Ab4)GNb2Ma6)Mb4GNb4(Fa6)GN;Asn
1749	Aa3Ab4GNb2(Fa3(Ab4)GNb4)Ma3(Ab4GNb2Ma6)Mb4GNb4(Fa6)GN;Asn
1750	Ab4GNb2(Fa3(Ab4)GNb4)Ma3(Aa3Ab4GNb2Ma6)Mb4GNb4(Fa6)GN;Asn
1751	Aa3Ab4GNb2(Ab4GNb4)Ma3(Fa3(Ab4)GNb2Ma6)Mb4GNb4(Fa6)GN;Asn
1752	Ab4GNb2(Aa3Ab4GNb4)Ma3(Fa3(Ab4)GNb2Ma6)Mb4GNb4(Fa6)GN;Asn
1753	Fa3(Aa3Ab4)GNb2(Ab4GNb4)Ma3(Ab4GNb2Ma6)Mb4GNb4(Fa6)GN;Asn
1754	Ab4GNb2(Fa3(Aa3Ab4)GNb4)Ma3(Ab4GNb2Ma6)Mb4GNb4(Fa6)GN;Asn
1755	Ab4GNb2(Ab4GNb4)Ma3(Fa3(Aa3Ab4)GNb2Ma6)Mb4GNb4(Fa6)GN;Asn
1756	Ab4GNb2Ma3(GNb4)(GNb3Ab4GNb2(Ab4GNb6)Ma6)Mb4GNb4(Fa6)GN;Asn
1757	Ab4GNb2Ma3(GNb4)(Ab4GNb2(GNb3Ab4GNb6)Ma6)Mb4GNb4(Fa6)GN;Asn
1758	NNa3Ab4GNb2Ma3(GNb4)(Ab4GNb2(Ab4GNb6)Ma6)Mb4GNb4(Fa6)GN;Asn
1759	Ab4GNb2Ma3(GNb4)(NNa3Ab4GNb2(Ab4GNb6)Ma6)Mb4GNb4(Fa6)GN;Asn
1760	Ab4GNb2Ma3(GNb4)(Ab4GNb2(NNa3Ab4GNb6)Ma6)Mb4GNb4(Fa6)GN;Asn
1761	Fa3(Ab4)GNb2Ma3(GNb4)(Ab4GNb2(Ab4GNb6)Ma6)Mb4GNb4(Fa6)GN;Asn
1762	Ab4GNb2Ma3(GNb4)(Fa3(Ab4)GNb2(Ab4GNb6)Ma6)Mb4GNb4(Fa6)GN;Asn
1763	Ab4GNb2Ma3(GNb4)(Ab4GNb2(Fa3(Ab4)GNb6)Ma6)Mb4GNb4(Fa6)GN;Asn
1764	Aa3Ab4GNb2Ma3(GNb4)(Ab4GNb2(Ab4GNb6)Ma6)Mb4GNb4(Fa6)GN;Asn
1765	Ab4GNb2Ma3(GNb4)(Aa3Ab4GNb2(Ab4GNb6)Ma6)Mb4GNb4(Fa6)GN;Asn
1766	Ab4GNb2Ma3(GNb4)(Ab4GNb2(Aa3Ab4GNb6)Ma6)Mb4GNb4(Fa6)GN;Asn
1767	NNa3Ab4GNb2Ma3(GNb4)(NNa3Ab4GNb2(GNb6)Ma6)Mb4GNb4(Fa6)GN;Asn
1768	Ab4GNb2Ma3(GNb4)(GNb2(Ab4GNb3Ab4GNb6)Ma6)Mb4GNb4(Fa6)GN;Asn
1769	NNa3Ab4GNb2Ma3(GNb4)(GNb2(NNa3Ab4GNb6)Ma6)Mb4GNb4(Fa6)GN;Asn
1770	Fa3(NNa3Ab4)GNb2Ma3(GNb4)(GNb2(Ab4GNb6)Ma6)Mb4GNb4(Fa6)GN;Asn
1771	NNa3Ab4GNb2Ma3(GNb4)(GNb2(Fa3(Ab4)GNb6)Ma6)Mb4GNb4(Fa6)GN;Asn
1772	NNa3Ab4GNb2Ma3(GNb4)(GNb2(Aa3Ab4GNb6)Ma6)Mb4GNb4(Fa6)GN;Asn
1773	Fa3(Ab4)GNb2Ma3(GNb4)(GNb2(NNa3Ab4GNb6)Ma6)Mb4GNb4(Fa6)GN;Asn
1774	Ab4GNb2Ma3(GNb4)(GNb2(Fa3(NNa3Ab4)GNb6)Ma6)Mb4GNb4(Fa6)GN;Asn
1775	Aa3Ab4GNb2Ma3(GNb4)(GNb2(NNa3Ab4GNb6)Ma6)Mb4GNb4(Fa6)GN;Asn
1776	Fa3(Ab4)GNb2Ma3(GNb4)(GNb2(Fa3(Ab4)GNb6)Ma6)Mb4GNb4(Fa6)GN;Asn
1777	GNb2Ma3(GNb4)(Ab4GNb2(Ab4GNb3Ab4GNb6)Ma6)Mb4GNb4(Fa6)GN;Asn
1778	GNb2Ma3(GNb4)(NNa3Ab4GNb2(NNa3Ab4GNb6)Ma6)Mb4GNb4(Fa6)GN;Asn
1779	Ab4GNb3Ab4GNb2Ma3(Ab4GNb2(Ab4GNb6)Ma6)Mb4GNb4(Fa6)GN;Asn
1780	NNa3Ab4GNb3Ab4GNb2Ma3(Ab4GNb2(GNb6)Ma6)Mb4GNb4(Fa6)GN;Asn
1781	Ab4GNb3Ab4GNb2Ma3(NNa3Ab4GNb2(GNb6)Ma6)Mb4GNb4(Fa6)GN;Asn
1782	Fa3(Ab4)GNb3Ab4GNb2Ma3(Ab4GNb2(GNb6)Ma6)Mb4GNb4(Fa6)GN;Asn
1783	Fa3(Ab4GNb3Ab4)GNb2Ma3(Ab4GNb2(GNb6)Ma6)Mb4GNb4(Fa6)GN;Asn
1784	Ab4GNb3Ab4GNb2Ma3(Fa3(Ab4)GNb2(GNb6)Ma6)Mb4GNb4(Fa6)GN;Asn
1785	Ab4GNb3Ab4GNb2Ma3(GNb2(GNb3Ab4GNb6)Ma6)Mb4GNb4(Fa6)GN;Asn
1786	NNa3Ab4GNb3Ab4GNb2Ma3(GNb2(Ab4GNb6)Ma6)Mb4GNb4(Fa6)GN;Asn
1787	Ab4GNb3Ab4GNb2Ma3(GNb2(NNa3Ab4GNb6)Ma6)Mb4GNb4(Fa6)GN;Asn
1788	Fa3(Ab4)GNb3Ab4GNb2Ma3(GNb2(Ab4GNb6)Ma6)Mb4GNb4(Fa6)GN;Asn
1789	Fa3(Ab4GNb3Ab4)GNb2Ma3(GNb2(Ab4GNb6)Ma6)Mb4GNb4(Fa6)GN;Asn
1790	Ab4GNb3Ab4GNb2Ma3(GNb2(Fa3(Ab4)GNb6)Ma6)Mb4GNb4(Fa6)GN;Asn
1791	Aa3Ab4GNb3Ab4GNb2Ma3(GNb2(Ab4GNb6)Ma6)Mb4GNb4(Fa6)GN;Asn
1792	Ab4GNb3Ab4GNb2Ma3(GNb2(Aa3Ab4GNb6)Ma6)Mb4GNb4(Fa6)GN;Asn
1793	GNb3Ab4GNb2Ma3(NNa3Ab4GNb2(Ab4GNb6)Ma6)Mb4GNb4(Fa6)GN;Asn
1794	GNb3Ab4GNb2Ma3(Ab4GNb2(NNa3Ab4GNb6)Ma6)Mb4GNb4(Fa6)GN;Asn
1795	Fa3(GNb3Ab4)GNb2Ma3(Ab4GNb2(Ab4GNb6)Ma6)Mb4GNb4(Fa6)GN;Asn
1796	GNb3Ab4GNb2Ma3(Fa3(Ab4)GNb2(Ab4GNb6)Ma6)Mb4GNb4(Fa6)GN;Asn
1797	GNb3Ab4GNb2Ma3(Ab4GNb2(Fa3(Ab4)GNb6)Ma6)Mb4GNb4(Fa6)GN;Asn
1798	Ab4GNb2Ma3(Ab4GNb3Ab4GNb2(Ab4GNb6)Ma6)Mb4GNb4(Fa6)GN;Asn
1799	NNa3Ab4GNb2Ma3(Ab4GNb3Ab4GNb2(GNb6)Ma6)Mb4GNb4(Fa6)GN;Asn
1800	Ab4GNb2Ma3(NNa3Ab4GNb3Ab4GNb2(GNb6)Ma6)Mb4GNb4(Fa6)GN;Asn
1801	Fa3(Ab4)GNb2Ma3(Ab4GNb3Ab4GNb2(GNb6)Ma6)Mb4GNb4(Fa6)GN;Asn
1802	Ab4GNb2Ma3(Fa3(Ab4)GNb3Ab4GNb2(GNb6)Ma6)Mb4GNb4(Fa6)GN;Asn
1803	Ab4GNb2Ma3(Fa3(Ab4GNb3Ab4)GNb2(GNb6)Ma6)Mb4GNb4(Fa6)GN;Asn
1804	Aa3Ab4GNb2Ma3(Ab4GNb3Ab4GNb2(GNb6)Ma6)Mb4GNb4(Fa6)GN;Asn
1805	Ab4GNb2Ma3(GNb3Ab4GNb2(GNb3Ab4GNb6)Ma6)Mb4GNb4(Fa6)GN;Asn
1806	NNa3Ab4GNb2Ma3(GNb3Ab4GNb2(Ab4GNb6)Ma6)Mb4GNb4(Fa6)GN;Asn
1807	Ab4GNb2Ma3(GNb3Ab4GNb2(NNa3Ab4GNb6)Ma6)Mb4GNb4(Fa6)GN;Asn
1808	Fa3(Ab4)GNb2Ma3(GNb3Ab4GNb2(Ab4GNb6)Ma6)Mb4GNb4(Fa6)GN;Asn
1809	Ab4GNb2Ma3(Fa3(GNb3Ab4)GNb2(Ab4GNb6)Ma6)Mb4GNb4(Fa6)GN;Asn
1810	Ab4GNb2Ma3(GNb3Ab4GNb2(Fa3(Ab4)GNb6)Ma6)Mb4GNb4(Fa6)GN;Asn
1811	Aa3Ab4GNb2Ma3(GNb3Ab4GNb2(Ab4GNb6)Ma6)Mb4GNb4(Fa6)GN;Asn
1812	Ab4GNb2Ma3(GNb3Ab4GNb2(Aa3Ab4GNb6)Ma6)Mb4GNb4(Fa6)GN;Asn
1813	Ab4GNb2Ma3(Ab4GNb2(Ab4GNb3Ab4GNb6)Ma6)Mb4GNb4(Fa6)GN;Asn
1814	NNa3Ab4GNb2Ma3(Ab4GNb2(GNb3Ab4GNb6)Ma6)Mb4GNb4(Fa6)GN;Asn
1815	Ab4GNb2Ma3(NNa3Ab4GNb2(GNb3Ab4GNb6)Ma6)Mb4GNb4(Fa6)GN;Asn
1816	Fa3(Ab4)GNb2Ma3(Ab4GNb2(GNb3Ab4GNb6)Ma6)Mb4GNb4(Fa6)GN;Asn
1817	Ab4GNb2Ma3(Fa3(Ab4)GNb2(GNb3Ab4GNb6)Ma6)Mb4GNb4(Fa6)GN;Asn
1818	Ab4GNb2Ma3(Ab4GNb2(Fa3(GNb3Ab4)GNb6)Ma6)Mb4GNb4(Fa6)GN;Asn
1819	Aa3Ab4GNb2Ma3(Ab4GNb2(GNb3Ab4GNb6)Ma6)Mb4GNb4(Fa6)GN;Asn
1820	Ab4GNb2Ma3(Aa3Ab4GNb2(GNb3Ab4GNb6)Ma6)Mb4GNb4(Fa6)GN;Asn
1821	NNa3Ab4GNb2Ma3(NNa3Ab4GNb2(Ab4GNb6)Ma6)Mb4GNb4(Fa6)GN;Asn
1822	NNa3Ab4GNb2Ma3(Ab4GNb2(NNa3Ab4GNb6)Ma6)Mb4GNb4(Fa6)GN;Asn
1823	Fa3(NNa3Ab4)GNb2Ma3(Ab4GNb2(Ab4GNb6)Ma6)Mb4GNb4(Fa6)GN;Asn
1824	NNa3Ab4GNb2Ma3(Fa3(Ab4)GNb2(Ab4GNb6)Ma6)Mb4GNb4(Fa6)GN;Asn
1825	NNa3Ab4GNb2Ma3(Ab4GNb2(Fa3(Ab4)GNb6)Ma6)Mb4GNb4(Fa6)GN;Asn
1826	NNa3Ab4GNb2Ma3(Aa3Ab4GNb2(Ab4GNb6)Ma6)Mb4GNb4(Fa6)GN;Asn
1827	NNa3Ab4GNb2Ma3(Ab4GNb2(Aa3Ab4GNb6)Ma6)Mb4GNb4(Fa6)GN;Asn
1828	Ab4GNb2Ma3(NNa3Ab4GNb2(NNa3Ab4GNb6)Ma6)Mb4GNb4(Fa6)GN;Asn
1829	Fa3(Ab4)GNb2Ma3(NNa3Ab4GNb2(Ab4GNb6)Ma6)Mb4GNb4(Fa6)GN;Asn
1830	Ab4GNb2Ma3(Fa3(NNa3Ab4)GNb2(Ab4GNb6)Ma6)Mb4GNb4(Fa6)GN;Asn
1831	Ab4GNb2Ma3(NNa3Ab4GNb2(Fa3(Ab4)GNb6)Ma6)Mb4GNb4(Fa6)GN;Asn
1832	Aa3Ab4GNb2Ma3(NNa3Ab4GNb2(Ab4GNb6)Ma6)Mb4GNb4(Fa6)GN;Asn
1833	Ab4GNb2Ma3(NNa3Ab4GNb2(Aa3Ab4GNb6)Ma6)Mb4GNb4(Fa6)GN;Asn
1834	Fa3(Ab4)GNb2Ma3(Ab4GNb2(NNa3Ab4GNb6)Ma6)Mb4GNb4(Fa6)GN;Asn
1835	Ab4GNb2Ma3(Fa3(Ab4)GNb2(NNa3Ab4GNb6)Ma6)Mb4GNb4(Fa6)GN;Asn
1836	Ab4GNb2Ma3(Ab4GNb2(Fa3(NNa3Ab4)GNb6)Ma6)Mb4GNb4(Fa6)GN;Asn
1837	Aa3Ab4GNb2Ma3(Ab4GNb2(NNa3Ab4GNb6)Ma6)Mb4GNb4(Fa6)GN;Asn
1838	Ab4GNb2Ma3(Aa3Ab4GNb2(NNa3Ab4GNb6)Ma6)Mb4GNb4(Fa6)GN;Asn
1839	Fa3(Ab4)GNb2Ma3(Fa3(Ab4)GNb2(Ab4GNb6)Ma6)Mb4GNb4(Fa6)GN;Asn
1840	Fa3(Ab4)GNb2Ma3(Ab4GNb2(Fa3(Ab4)GNb6)Ma6)Mb4GNb4(Fa6)GN;Asn
1841	Fa3(Ab4)GNb2Ma3(Aa3Ab4GNb2(Ab4GNb6)Ma6)Mb4GNb4(Fa6)GN;Asn
1842	Fa3(Ab4)GNb2Ma3(Ab4GNb2(Aa3Ab4GNb6)Ma6)Mb4GNb4(Fa6)GN;Asn
1843	Ab4GNb2Ma3(Fa3(Ab4)GNb2(Fa3(Ab4)GNb6)Ma6)Mb4GNb4(Fa6)GN;Asn
1844	Aa3Ab4GNb2Ma3(Fa3(Ab4)GNb2(Ab4GNb6)Ma6)Mb4GNb4(Fa6)GN;Asn
1845	Ab4GNb2Ma3(Fa3(Ab4)GNb2(Aa3Ab4GNb6)Ma6)Mb4GNb4(Fa6)GN;Asn
1846	Aa3Ab4GNb2Ma3(Ab4GNb2(Fa3(Ab4)GNb6)Ma6)Mb4GNb4(Fa6)GN;Asn
1847	Ab4GNb2Ma3(Aa3Ab4GNb2(Fa3(Ab4)GNb6)Ma6)Mb4GNb4(Fa6)GN;Asn
1848	Fa3(Aa3Ab4)GNb2Ma3(Ab4GNb2(Ab4GNb6)Ma6)Mb4GNb4(Fa6)GN;Asn
1849	Aa3Ab4GNb2Ma3(Aa3Ab4GNb2(Ab4GNb6)Ma6)Mb4GNb4(Fa6)GN;Asn
1850	Aa3Ab4GNb2Ma3(Ab4GNb2(Aa3Ab4GNb6)Ma6)Mb4GNb4(Fa6)GN;Asn
1851	Ab4GNb2Ma3(Fa3(Aa3Ab4)GNb2(Ab4GNb6)Ma6)Mb4GNb4(Fa6)GN;Asn
1852	Ab4GNb2Ma3(Aa3Ab4GNb2(Aa3Ab4GNb6)Ma6)Mb4GNb4(Fa6)GN;Asn
1853	Ab4GNb2Ma3(Ab4GNb2(Fa3(Aa3Ab4)GNb6)Ma6)Mb4GNb4(Fa6)GN;Asn
1854	Fa3(NNa3Ab4)GNb2Ma3(NNa3Ab4GNb2(GNb6)Ma6)Mb4GNb4(Fa6)GN;Asn
1855	NNa3Ab4GNb2Ma3(Fa3(NNa3Ab4)GNb2(GNb6)Ma6)Mb4GNb4(Fa6)GN;Asn
1856	Fa3(NNa3Ab4)GNb2Ma3(Fa3(Ab4)GNb2(GNb6)Ma6)Mb4GNb4(Fa6)GN;Asn
1857	Fa3(Ab4)GNb2Ma3(Fa3(NNa3Ab4)GNb2(GNb6)Ma6)Mb4GNb4(Fa6)GN;Asn
1858	Ab4GNb2Ma3(GNb2(GNb3Ab4GNb3Ab4GNb6)Ma6)Mb4GNb4(Fa6)GN;Asn
1859	NNa3Ab4GNb2Ma3(GNb2(Ab4GNb3Ab4GNb6)Ma6)Mb4GNb4(Fa6)GN;Asn
1860	Ab4GNb2Ma3(GNb2(NNa3Ab4GNb3Ab4GNb6)Ma6)Mb4GNb4(Fa6)GN;Asn
1861	Fa3(Ab4)GNb2Ma3(GNb2(Ab4GNb3Ab4GNb6)Ma6)Mb4GNb4(Fa6)GN;Asn
1862	Ab4GNb2Ma3(GNb2(Fa3(Ab4)GNb3Ab4GNb6)Ma6)Mb4GNb4(Fa6)GN;Asn
1863	Ab4GNb2Ma3(GNb2(Fa3(Ab4GNb3Ab4)GNb6)Ma6)Mb4GNb4(Fa6)GN;Asn
1864	Aa3Ab4GNb2Ma3(GNb2(Ab4GNb3Ab4GNb6)Ma6)Mb4GNb4(Fa6)GN;Asn
1865	Ab4GNb2Ma3(GNb2(Aa3Ab4GNb3Ab4GNb6)Ma6)Mb4GNb4(Fa6)GN;Asn
1866	Fa3(NNa3Ab4)GNb2Ma3(GNb2(GNb3Ab4GNb6)Ma6)Mb4GNb4(Fa6)GN;Asn
1867	NNa3Ab4GNb2Ma3(GNb2(Fa3(GNb3Ab4)GNb6)Ma6)Mb4GNb4(Fa6)GN;Asn
1868	Fa3(NNa3Ab4)GNb2Ma3(GNb2(NNa3Ab4GNb6)Ma6)Mb4GNb4(Fa6)GN;Asn
1869	NNa3Ab4GNb2Ma3(GNb2(Fa3(NNa3Ab4)GNb6)Ma6)Mb4GNb4(Fa6)GN;Asn
1870	Fa3(NNa3Ab4)GNb2Ma3(GNb2(Fa3(Ab4)GNb6)Ma6)Mb4GNb4(Fa6)GN;Asn
1871	Fa3(NNa3Ab4)GNb2Ma3(GNb2(Aa3Ab4GNb6)Ma6)Mb4GNb4(Fa6)GN;Asn
1872	NNa3Ab4GNb2Ma3(GNb2(Fa3(Aa3Ab4)GNb6)Ma6)Mb4GNb4(Fa6)GN;Asn
1873	Fa3(Ab4)GNb2Ma3(GNb2(Fa3(NNa3Ab4)GNb6)Ma6)Mb4GNb4(Fa6)GN;Asn
1874	Aa3Ab4GNb2Ma3(GNb2(Fa3(NNa3Ab4)GNb6)Ma6)Mb4GNb4(Fa6)GN;Asn
1875	Fa3(Aa3Ab4)GNb2Ma3(GNb2(NNa3Ab4GNb6)Ma6)Mb4GNb4(Fa6)GN;Asn
1876	Fa3(Aa3Ab4)GNb2Ma3(GNb2(Fa3(Ab4)GNb6)Ma6)Mb4GNb4(Fa6)GN;Asn
1877	GNb2Ma3(NNa3Ab4GNb3Ab4GNb2(Ab4GNb6)Ma6)Mb4GNb4(Fa6)GN;Asn
1878	GNb2Ma3(Ab4GNb3Ab4GNb2(NNa3Ab4GNb6)Ma6)Mb4GNb4(Fa6)GN;Asn
1879	GNb2Ma3(Fa3(Ab4)GNb3Ab4GNb2(Ab4GNb6)Ma6)Mb4GNb4(Fa6)GN;Asn
1880	GNb2Ma3(Fa3(Ab4GNb3Ab4)GNb2(Ab4GNb6)Ma6)Mb4GNb4(Fa6)GN;Asn
1881	GNb2Ma3(Ab4GNb3Ab4GNb2(Fa3(Ab4)GNb6)Ma6)Mb4GNb4(Fa6)GN;Asn
1882	GNb2Ma3(Ab4GNb3Ab4GNb2(Aa3Ab4GNb6)Ma6)Mb4GNb4(Fa6)GN;Asn
1883	GNb2Ma3(GNb3Ab4GNb2(Ab4GNb3Ab4GNb6)Ma6)Mb4GNb4(Fa6)GN;Asn
1884	GNb2Ma3(Ab4GNb2(GNb3Ab4GNb3Ab4GNb6)Ma6)Mb4GNb4(Fa6)GN;Asn
1885	GNb2Ma3(NNa3Ab4GNb2(Ab4GNb3Ab4GNb6)Ma6)Mb4GNb4(Fa6)GN;Asn
1886	GNb2Ma3(Ab4GNb2(NNa3Ab4GNb3Ab4GNb6)Ma6)Mb4GNb4(Fa6)GN;Asn
1887	GNb2Ma3(Fa3(Ab4)GNb2(Ab4GNb3Ab4GNb6)Ma6)Mb4GNb4(Fa6)GN;Asn
1888	GNb2Ma3(Ab4GNb2(Fa3(Ab4)GNb3Ab4GNb6)Ma6)Mb4GNb4(Fa6)GN;Asn
1889	GNb2Ma3(Ab4GNb2(Fa3(Ab4GNb3Ab4)GNb6)Ma6)Mb4GNb4(Fa6)GN;Asn
1890	GNb2Ma3(Aa3Ab4GNb2(Ab4GNb3Ab4GNb6)Ma6)Mb4GNb4(Fa6)GN;Asn
1891	GNb2Ma3(Ab4GNb2(Aa3Ab4GNb3Ab4GNb6)Ma6)Mb4GNb4(Fa6)GN;Asn
1892	GNb2Ma3(Fa3(NNa3Ab4)GNb2(NNa3Ab4GNb6)Ma6)Mb4GNb4(Fa6)GN;Asn
1893	GNb2Ma3(NNa3Ab4GNb2(Fa3(NNa3Ab4)GNb6)Ma6)Mb4GNb4(Fa6)GN;Asn
1894	GNb2Ma3(Fa3(NNa3Ab4)GNb2(Fa3(Ab4)GNb6)Ma6)Mb4GNb4(Fa6)GN;Asn
1895	GNb2Ma3(Fa3(Ab4)GNb2(Fa3(NNa3Ab4)GNb6)Ma6)Mb4GNb4(Fa6)GN;Asn
1896	GNb2Ma3(GNb2(Ab4GNb3Ab4GNb3Ab4GNb6)Ma6)Mb4GNb4(Fa6)GN;Asn
1897	Fa3(NNa3Ab4)GNb2Ma3(Fa3(NNa3Ab4)GNb2Ma6)Mb4GNb4(Fa6)GN;Asn
1898	Ab4GNb2(Ab4GNb4)Ma3(GNb4)(Ab4GNb2(Ab4GNb6)Ma6)Mb4GNb4GN;Asn
1899	NNa3Ab4GNb2(Ab4GNb4)Ma3(GNb4)(Ab4GNb2(GNb6)Ma6)Mb4GNb4GN;Asn
1900	Ab4GNb2(NNa3Ab4GNb4)Ma3(GNb4)(Ab4GNb2(GNb6)Ma6)Mb4GNb4GN;Asn
1901	Ab4GNb2(Ab4GNb4)Ma3(GNb4)(NNa3Ab4GNb2(GNb6)Ma6)Mb4GNb4GN;Asn
1902	Fa3(Ab4)GNb2(Ab4GNb4)Ma3(GNb4)(Ab4GNb2(GNb6)Ma6)Mb4GNb4GN;Asn
1903	Ab4GNb2(Fa3(Ab4)GNb4)Ma3(GNb4)(Ab4GNb2(GNb6)Ma6)Mb4GNb4GN;Asn
1904	Ab4GNb2(Ab4GNb4)Ma3(GNb4)(Fa3(Ab4)GNb2(GNb6)Ma6)Mb4GNb4GN;Asn
1905	Ab4GNb2(Ab4GNb4)Ma3(GNb4)(GNb2(GNb3Ab4GNb6)Ma6)Mb4GNb4GN;Asn
1906	NNa3Ab4GNb2(Ab4GNb4)Ma3(GNb4)(GNb2(Ab4GNb6)Ma6)Mb4GNb4GN;Asn
1907	Ab4GNb2(NNa3Ab4GNb4)Ma3(GNb4)(GNb2(Ab4GNb6)Ma6)Mb4GNb4GN;Asn
1908	Ab4GNb2(Ab4GNb4)Ma3(GNb4)(GNb2(NNa3Ab4GNb6)Ma6)Mb4GNb4GN;Asn
1909	Fa3(Ab4)GNb2(Ab4GNb4)Ma3(GNb4)(GNb2(Ab4GNb6)Ma6)Mb4GNb4GN;Asn
1910	Ab4GNb2(Fa3(Ab4)GNb4)Ma3(GNb4)(GNb2(Ab4GNb6)Ma6)Mb4GNb4GN;Asn
1911	Ab4GNb2(Ab4GNb4)Ma3(GNb4)(GNb2(Fa3(Ab4)GNb6)Ma6)Mb4GNb4GN;Asn
1912	Aa3Ab4GNb2(Ab4GNb4)Ma3(GNb4)(GNb2(Ab4GNb6)Ma6)Mb4GNb4GN;Asn
1913	Ab4GNb2(Aa3Ab4GNb4)Ma3(GNb4)(GNb2(Ab4GNb6)Ma6)Mb4GNb4GN;Asn
1914	Ab4GNb2(Ab4GNb4)Ma3(GNb4)(GNb2(Aa3Ab4GNb6)Ma6)Mb4GNb4GN;Asn
1915	NNa3Ab4GNb2(GNb4)Ma3(GNb4)(Ab4GNb2(Ab4GNb6)Ma6)Mb4GNb4GN;Asn
1916	Ab4GNb2(GNb4)Ma3(GNb4)(NNa3Ab4GNb2(Ab4GNb6)Ma6)Mb4GNb4GN;Asn
1917	Ab4GNb2(GNb4)Ma3(GNb4)(Ab4GNb2(NNa3Ab4GNb6)Ma6)Mb4GNb4GN;Asn
1918	Fa3(Ab4)GNb2(GNb4)Ma3(GNb4)(Ab4GNb2(Ab4GNb6)Ma6)Mb4GNb4GN;Asn
1919	Ab4GNb2(GNb4)Ma3(GNb4)(Ab4GNb2(Fa3(Ab4)GNb6)Ma6)Mb4GNb4GN;Asn
1920	GNb2(NNa3Ab4GNb4)Ma3(GNb4)(Ab4GNb2(Ab4GNb6)Ma6)Mb4GNb4GN;Asn
1921	GNb2(Ab4GNb4)Ma3(GNb4)(NNa3Ab4GNb2(Ab4GNb6)Ma6)Mb4GNb4GN;Asn
1922	GNb2(Ab4GNb4)Ma3(GNb4)(Ab4GNb2(NNa3Ab4GNb6)Ma6)Mb4GNb4GN;Asn
1923	GNb2(Fa3(Ab4)GNb4)Ma3(GNb4)(Ab4GNb2(Ab4GNb6)Ma6)Mb4GNb4GN;Asn
1924	GNb2(Ab4GNb4)Ma3(GNb4)(Fa3(Ab4)GNb2(Ab4GNb6)Ma6)Mb4GNb4GN;Asn
1925	GNb2(Ab4GNb4)Ma3(GNb4)(Ab4GNb2(Fa3(Ab4)GNb6)Ma6)Mb4GNb4GN;Asn
1926	Ab4GNb3Ab4GNb2(Ab4GNb4)Ma3(Ab4GNb2(GNb6)Ma6)Mb4GNb4GN;Asn
1927	Ab4GNb3Ab4GNb2(Ab4GNb4)Ma3(GNb2(Ab4GNb6)Ma6)Mb4GNb4GN;Asn
1928	NNa3Ab4GNb3Ab4GNb2(Ab4GNb4)Ma3(GNb2(GNb6)Ma6)Mb4GNb4GN;Asn
1929	Ab4GNb3Ab4GNb2(NNa3Ab4GNb4)Ma3(GNb2(GNb6)Ma6)Mb4GNb4GN;Asn
1930	GNb3Ab4GNb2(Ab4GNb4)Ma3(Ab4GNb2(Ab4GNb6)Ma6)Mb4GNb4GN;Asn
1931	GNb3Ab4GNb2(NNa3Ab4GNb4)Ma3(Ab4GNb2(GNb6)Ma6)Mb4GNb4GN;Asn
1932	GNb3Ab4GNb2(NNa3Ab4GNb4)Ma3(GNb2(Ab4GNb6)Ma6)Mb4GNb4GN;Asn
1933	GNb3Ab4GNb2(Ab4GNb4)Ma3(GNb2(NNa3Ab4GNb6)Ma6)Mb4GNb4GN;Asn
1934	GNb3Ab4GNb2(Fa3(Ab4)GNb4)Ma3(GNb2(Ab4GNb6)Ma6)Mb4GNb4GN;Asn
1935	GNb3Ab4GNb2(Ab4GNb4)Ma3(GNb2(Fa3(Ab4)GNb6)Ma6)Mb4GNb4GN;Asn
1936	Ab4GNb2(Ab4GNb3Ab4GNb4)Ma3(Ab4GNb2(GNb6)Ma6)Mb4GNb4GN;Asn
1937	Ab4GNb2(Ab4GNb3Ab4GNb4)Ma3(GNb2(Ab4GNb6)Ma6)Mb4GNb4GN;Asn
1938	NNa3Ab4GNb2(Ab4GNb3Ab4GNb4)Ma3(GNb2(GNb6)Ma6)Mb4GNb4GN;Asn
1939	Ab4GNb2(NNa3Ab4GNb3Ab4GNb4)Ma3(GNb2(GNb6)Ma6)Mb4GNb4GN;Asn
1940	Fa3(Ab4)GNb2(Ab4GNb3Ab4GNb4)Ma3(GNb2(GNb6)Ma6)Mb4GNb4GN;Asn
1941	Ab4GNb2(Fa3(Ab4)GNb3Ab4GNb4)Ma3(GNb2(GNb6)Ma6)Mb4GNb4GN;Asn
1942	Ab4GNb2(Fa3(Ab4GNb3Ab4)GNb4)Ma3(GNb2(GNb6)Ma6)Mb4GNb4GN;Asn
1943	Ab4GNb2(GNb3Ab4GNb4)Ma3(Ab4GNb2(Ab4GNb6)Ma6)Mb4GNb4GN;Asn
1944	NNa3Ab4GNb2(GNb3Ab4GNb4)Ma3(Ab4GNb2(GNb6)Ma6)Mb4GNb4GN;Asn
1945	Ab4GNb2(GNb3Ab4GNb4)Ma3(NNa3Ab4GNb2(GNb6)Ma6)Mb4GNb4GN;Asn
1946	NNa3Ab4GNb2(GNb3Ab4GNb4)Ma3(GNb2(Ab4GNb6)Ma6)Mb4GNb4GN;Asn
1947	Ab4GNb2(GNb3Ab4GNb4)Ma3(GNb2(NNa3Ab4GNb6)Ma6)Mb4GNb4GN;Asn
1948	Fa3(Ab4)GNb2(GNb3Ab4GNb4)Ma3(GNb2(Ab4GNb6)Ma6)Mb4GNb4GN;Asn
1949	Ab4GNb2(Fa3(GNb3Ab4)GNb4)Ma3(GNb2(Ab4GNb6)Ma6)Mb4GNb4GN;Asn
1950	Ab4GNb2(GNb3Ab4GNb4)Ma3(GNb2(Fa3(Ab4)GNb6)Ma6)Mb4GNb4GN;Asn
1951	Ab4GNb2(Ab4GNb4)Ma3(Ab4GNb3Ab4GNb2(GNb6)Ma6)Mb4GNb4GN;Asn
1952	Ab4GNb2(Ab4GNb4)Ma3(GNb3Ab4GNb2(Ab4GNb6)Ma6)Mb4GNb4GN;Asn
1953	NNa3Ab4GNb2(Ab4GNb4)Ma3(GNb3Ab4GNb2(GNb6)Ma6)Mb4GNb4GN;Asn
1954	Ab4GNb2(NNa3Ab4GNb4)Ma3(GNb3Ab4GNb2(GNb6)Ma6)Mb4GNb4GN;Asn
1955	Fa3(Ab4)GNb2(Ab4GNb4)Ma3(GNb3Ab4GNb2(GNb6)Ma6)Mb4GNb4GN;Asn
1956	Ab4GNb2(Fa3(Ab4)GNb4)Ma3(GNb3Ab4GNb2(GNb6)Ma6)Mb4GNb4GN;Asn
1957	Ab4GNb2(Ab4GNb4)Ma3(Fa3(GNb3Ab4)GNb2(GNb6)Ma6)Mb4GNb4GN;Asn
1958	Ab4GNb2(Aa3Ab4GNb4)Ma3(GNb3Ab4GNb2(GNb6)Ma6)Mb4GNb4GN;Asn
1959	Ab4GNb2(Ab4GNb4)Ma3(Ab4GNb2(GNb3Ab4GNb6)Ma6)Mb4GNb4GN;Asn
1960	NNa3Ab4GNb2(Ab4GNb4)Ma3(Ab4GNb2(Ab4GNb6)Ma6)Mb4GNb4GN;Asn
1961	Ab4GNb2(NNa3Ab4GNb4)Ma3(Ab4GNb2(Ab4GNb6)Ma6)Mb4GNb4GN;Asn
1962	Ab4GNb2(Ab4GNb4)Ma3(NNa3Ab4GNb2(Ab4GNb6)Ma6)Mb4GNb4GN;Asn
1963	Ab4GNb2(Ab4GNb4)Ma3(Ab4GNb2(NNa3Ab4GNb6)Ma6)Mb4GNb4GN;Asn
1964	Fa3(Ab4)GNb2(Ab4GNb4)Ma3(Ab4GNb2(Ab4GNb6)Ma6)Mb4GNb4GN;Asn
1965	Ab4GNb2(Fa3(Ab4)GNb4)Ma3(Ab4GNb2(Ab4GNb6)Ma6)Mb4GNb4GN;Asn
1966	Ab4GNb2(Ab4GNb4)Ma3(Fa3(Ab4)GNb2(Ab4GNb6)Ma6)Mb4GNb4GN;Asn
1967	Ab4GNb2(Ab4GNb4)Ma3(Ab4GNb2(Fa3(Ab4)GNb6)Ma6)Mb4GNb4GN;Asn
1968	Aa3Ab4GNb2(Ab4GNb4)Ma3(Ab4GNb2(Ab4GNb6)Ma6)Mb4GNb4GN;Asn
1969	Ab4GNb2(Aa3Ab4GNb4)Ma3(Ab4GNb2(Ab4GNb6)Ma6)Mb4GNb4GN;Asn
1970	Ab4GNb2(Ab4GNb4)Ma3(Aa3Ab4GNb2(Ab4GNb6)Ma6)Mb4GNb4GN;Asn
1971	Ab4GNb2(Ab4GNb4)Ma3(Ab4GNb2(Aa3Ab4GNb6)Ma6)Mb4GNb4GN;Asn
1972	NNa3Ab4GNb2(NNa3Ab4GNb4)Ma3(Ab4GNb2(GNb6)Ma6)Mb4GNb4GN;Asn
1973	NNa3Ab4GNb2(Ab4GNb4)Ma3(NNa3Ab4GNb2(GNb6)Ma6)Mb4GNb4GN;Asn
1974	Fa3(NNa3Ab4)GNb2(Ab4GNb4)Ma3(Ab4GNb2(GNb6)Ma6)Mb4GNb4GN;Asn
1975	NNa3Ab4GNb2(Fa3(Ab4)GNb4)Ma3(Ab4GNb2(GNb6)Ma6)Mb4GNb4GN;Asn
1976	NNa3Ab4GNb2(Ab4GNb4)Ma3(Fa3(Ab4)GNb2(GNb6)Ma6)Mb4GNb4GN;Asn
1977	NNa3Ab4GNb2(Aa3Ab4GNb4)Ma3(Ab4GNb2(GNb6)Ma6)Mb4GNb4GN;Asn
1978	NNa3Ab4GNb2(Ab4GNb4)Ma3(Aa3Ab4GNb2(GNb6)Ma6)Mb4GNb4GN;Asn
1979	Ab4GNb2(NNa3Ab4GNb4)Ma3(NNa3Ab4GNb2(GNb6)Ma6)Mb4GNb4GN;Asn
1980	Fa3(Ab4)GNb2(NNa3Ab4GNb4)Ma3(Ab4GNb2(GNb6)Ma6)Mb4GNb4GN;Asn
1981	Ab4GNb2(Fa3(NNa3Ab4)GNb4)Ma3(Ab4GNb2(GNb6)Ma6)Mb4GNb4GN;Asn
1982	Ab4GNb2(NNa3Ab4GNb4)Ma3(Fa3(Ab4)GNb2(GNb6)Ma6)Mb4GNb4GN;Asn
1983	Aa3Ab4GNb2(NNa3Ab4GNb4)Ma3(Ab4GNb2(GNb6)Ma6)Mb4GNb4GN;Asn
1984	Ab4GNb2(NNa3Ab4GNb4)Ma3(Aa3Ab4GNb2(GNb6)Ma6)Mb4GNb4GN;Asn
1985	Fa3(Ab4)GNb2(Ab4GNb4)Ma3(NNa3Ab4GNb2(GNb6)Ma6)Mb4GNb4GN;Asn
1986	Ab4GNb2(Fa3(Ab4)GNb4)Ma3(NNa3Ab4GNb2(GNb6)Ma6)Mb4GNb4GN;Asn
1987	Ab4GNb2(Ab4GNb4)Ma3(Fa3(NNa3Ab4)GNb2(GNb6)Ma6)Mb4GNb4GN;Asn
1988	Aa3Ab4GNb2(Ab4GNb4)Ma3(NNa3Ab4GNb2(GNb6)Ma6)Mb4GNb4GN;Asn
1989	Ab4GNb2(Aa3Ab4GNb4)Ma3(NNa3Ab4GNb2(GNb6)Ma6)Mb4GNb4GN;Asn
1990	Fa3(Ab4)GNb2(Fa3(Ab4)GNb4)Ma3(Ab4GNb2(GNb6)Ma6)Mb4GNb4GN;Asn
1991	Fa3(Ab4)GNb2(Ab4GNb4)Ma3(Fa3(Ab4)GNb2(GNb6)Ma6)Mb4GNb4GN;Asn
1992	Fa3(Ab4)GNb2(Aa3Ab4GNb4)Ma3(Ab4GNb2(GNb6)Ma6)Mb4GNb4GN;Asn
1993	Fa3(Ab4)GNb2(Ab4GNb4)Ma3(Aa3Ab4GNb2(GNb6)Ma6)Mb4GNb4GN;Asn
1994	Ab4GNb2(Fa3(Ab4)GNb4)Ma3(Fa3(Ab4)GNb2(GNb6)Ma6)Mb4GNb4GN;Asn
1995	Aa3Ab4GNb2(Fa3(Ab4)GNb4)Ma3(Ab4GNb2(GNb6)Ma6)Mb4GNb4GN;Asn
1996	Ab4GNb2(Fa3(Ab4)GNb4)Ma3(Aa3Ab4GNb2(GNb6)Ma6)Mb4GNb4GN;Asn
1997	Aa3Ab4GNb2(Ab4GNb4)Ma3(Fa3(Ab4)GNb2(GNb6)Ma6)Mb4GNb4GN;Asn
1998	Ab4GNb2(Aa3Ab4GNb4)Ma3(Fa3(Ab4)GNb2(GNb6)Ma6)Mb4GNb4GN;Asn
1999	Fa3(Aa3Ab4)GNb2(Ab4GNb4)Ma3(Ab4GNb2(GNb6)Ma6)Mb4GNb4GN;Asn
[truncated: 32,882 more rows]
